# Supplementary material for: Do minimum wage laws affect those who are not covered? Evidence from agricultural and non-agricultural workers
Source: PubMed Central journal article supplement (PMC6774472; doi:10.1371/journal.pone.0221935), 2019-10-02
Supplement: pone.0221935.s005.pdf [file pone.0221935.s005.pdf]

## User Extract cps\_00016.dat

### Jump to Section

1. [Document Description](#)
2. [Study Description](#)
3. [File Description](#)
4. [Variable Description](#)

## § 1. Document Description

### Citation

|                                 |                                                                                             |
|---------------------------------|---------------------------------------------------------------------------------------------|
| <b>Title Statement</b>          |                                                                                             |
| Title:                          | Codebook for an IPUMS-CPS Data Extract                                                      |
| Subtitle:                       | DDI 2.1 metadata describing the extract file 'cps_00016.dat'                                |
| Identification Number:          | ddi2-69109_cps_00016.dat-cps.ipums.org                                                      |
| <b>Responsibility Statement</b> |                                                                                             |
| Authoring Entity:               | Minnesota Population Center                                                                 |
| Affiliation:                    | University of Minnesota                                                                     |
| <b>Production Statement</b>     |                                                                                             |
| Producer:                       | Minnesota Population Center                                                                 |
| Affiliation:                    | University of Minnesota                                                                     |
| Role:                           | Documentation                                                                               |
| Date of Production:             | May 21, 2017                                                                                |
| Place of Production:            | Minnesota Population Center, 50 Willey Hall, 225 - 19th Avenue South, Minneapolis, MN 55455 |

|                               |                                                     |
|-------------------------------|-----------------------------------------------------|
| <b>Distribution Statement</b> |                                                     |
| Contact Persons:              | Minnesota Population Center                         |
| Affiliation:                  | University of Minnesota                             |
| URI:                          | <a href="http://pop.umn.edu">http://pop.umn.edu</a> |

## § 2. Study Description

### Citation

|                                 |                                                                                             |
|---------------------------------|---------------------------------------------------------------------------------------------|
| <b>Title Statement</b>          |                                                                                             |
| Title:                          | User Extract cps_00016.dat                                                                  |
| <b>Responsibility Statement</b> |                                                                                             |
| Authoring Entity:               | Minnesota Population Center                                                                 |
| Affiliation:                    | University of Minnesota                                                                     |
| <b>Production Statement</b>     |                                                                                             |
| Producer:                       | Minnesota Population Center                                                                 |
| Affiliation:                    | University of Minnesota                                                                     |
| Role:                           | Documentation                                                                               |
| Date of Production:             | May 21, 2017                                                                                |
| Place of Production:            | Minnesota Population Center, 50 Willey Hall, 225 - 19th Avenue South, Minneapolis, MN 55455 |
| <b>Distribution Statement</b>   |                                                                                             |
| Contact Persons:                | Minnesota Population Center                                                                 |
| Affiliation:                    | University of Minnesota                                                                     |
| URI:                            | <a href="http://pop.umn.edu">http://pop.umn.edu</a>                                         |
| <b>Version Statement</b>        |                                                                                             |

|       |            |
|-------|------------|
| Date: | 2017-05-21 |
|-------|------------|

## Study Scope

| <b>Subject Information</b>      |                                                             |
|---------------------------------|-------------------------------------------------------------|
| Topic Classification:           | Technical Variables -- HOUSEHOLD                            |
|                                 | Linking Variables -- HOUSEHOLD                              |
|                                 | Geographic Variables -- HOUSEHOLD                           |
|                                 | Technical Variables -- PERSON                               |
|                                 | Linking Variables -- PERSON                                 |
|                                 | Family Interrelationship Variables -- PERSON                |
|                                 | Core Demographic Variables -- PERSON                        |
|                                 | Ethnicity/Nativity Variables -- PERSON                      |
|                                 | Education Variables -- PERSON                               |
|                                 | Work Variables -- PERSON                                    |
|                                 | Outgoing Rotation Groups (Earner Study) Variables -- PERSON |
|                                 | Income Variables -- PERSON                                  |
| <b>Summary Data Description</b> |                                                             |
| Time Period:                    | 1980-03                                                     |
| Country:                        | United States                                               |
| <b>Summary Data Description</b> |                                                             |
| Time Period:                    | 1981-03                                                     |
| Country:                        | United States                                               |
| <b>Summary Data Description</b> |                                                             |
| Time Period:                    | 1982-03                                                     |

|                                 |               |
|---------------------------------|---------------|
| Country:                        | United States |
| <b>Summary Data Description</b> |               |
| Time Period:                    | 1983-03       |
| Country:                        | United States |
| <b>Summary Data Description</b> |               |
| Time Period:                    | 1984-03       |
| Country:                        | United States |
| <b>Summary Data Description</b> |               |
| Time Period:                    | 1985-03       |
| Country:                        | United States |
| <b>Summary Data Description</b> |               |
| Time Period:                    | 1986-03       |
| Country:                        | United States |
| <b>Summary Data Description</b> |               |
| Time Period:                    | 1987-03       |
| Country:                        | United States |
| <b>Summary Data Description</b> |               |
| Time Period:                    | 1988-03       |
| Country:                        | United States |
| <b>Summary Data Description</b> |               |
| Time Period:                    | 1989-03       |
| Country:                        | United States |
| <b>Summary Data Description</b> |               |

|                                 |               |
|---------------------------------|---------------|
| Time Period:                    | 1990-03       |
| Country:                        | United States |
| <b>Summary Data Description</b> |               |
| Time Period:                    | 1991-03       |
| Country:                        | United States |
| <b>Summary Data Description</b> |               |
| Time Period:                    | 1992-03       |
| Country:                        | United States |
| <b>Summary Data Description</b> |               |
| Time Period:                    | 1993-03       |
| Country:                        | United States |
| <b>Summary Data Description</b> |               |
| Time Period:                    | 1994-03       |
| Country:                        | United States |
| <b>Summary Data Description</b> |               |
| Time Period:                    | 1995-03       |
| Country:                        | United States |
| <b>Summary Data Description</b> |               |
| Time Period:                    | 1996-03       |
| Country:                        | United States |
| <b>Summary Data Description</b> |               |
| Time Period:                    | 1997-03       |
| Country:                        | United States |

|                                 |               |
|---------------------------------|---------------|
| <b>Summary Data Description</b> |               |
| Time Period:                    | 1998-03       |
| Country:                        | United States |
| <b>Summary Data Description</b> |               |
| Time Period:                    | 1999-03       |
| Country:                        | United States |
| <b>Summary Data Description</b> |               |
| Time Period:                    | 2000-03       |
| Country:                        | United States |
| <b>Summary Data Description</b> |               |
| Time Period:                    | 2001-03       |
| Country:                        | United States |
| <b>Summary Data Description</b> |               |
| Time Period:                    | 2002-03       |
| Country:                        | United States |
| <b>Summary Data Description</b> |               |
| Time Period:                    | 2003-03       |
| Country:                        | United States |
| <b>Summary Data Description</b> |               |
| Time Period:                    | 2004-03       |
| Country:                        | United States |
| <b>Summary Data Description</b> |               |
| Time Period:                    | 2005-03       |

|                                 |               |
|---------------------------------|---------------|
| Country:                        | United States |
| <b>Summary Data Description</b> |               |
| Time Period:                    | 2006-03       |
| Country:                        | United States |
| <b>Summary Data Description</b> |               |
| Time Period:                    | 2007-03       |
| Country:                        | United States |
| <b>Summary Data Description</b> |               |
| Time Period:                    | 2008-03       |
| Country:                        | United States |
| <b>Summary Data Description</b> |               |
| Time Period:                    | 2009-03       |
| Country:                        | United States |
| <b>Summary Data Description</b> |               |
| Time Period:                    | 2010-03       |
| Country:                        | United States |
| <b>Summary Data Description</b> |               |
| Time Period:                    | 2011-03       |
| Country:                        | United States |
| <b>Summary Data Description</b> |               |
| Time Period:                    | 2012-03       |
| Country:                        | United States |
| <b>Summary Data Description</b> |               |

|                                 |                                                                                             |
|---------------------------------|---------------------------------------------------------------------------------------------|
| Time Period:                    | 2013-03                                                                                     |
| Country:                        | United States                                                                               |
| <b>Summary Data Description</b> |                                                                                             |
| Time Period:                    | 2014-03                                                                                     |
| Country:                        | United States                                                                               |
| <b>Summary Data Description</b> |                                                                                             |
| Time Period:                    | 2015-03                                                                                     |
| Country:                        | United States                                                                               |
| <b>Summary Data Description</b> |                                                                                             |
| Time Period:                    | 2016-03                                                                                     |
| Country:                        | United States                                                                               |
| <b>Notes</b>                    |                                                                                             |
| Note:                           | Additional notes on a sample that is part of this study: IPUMS-CPS, ASEC 1980; regular size |
|                                 | Additional notes on a sample that is part of this study: IPUMS-CPS, ASEC 1981; regular size |
|                                 | Additional notes on a sample that is part of this study: IPUMS-CPS, ASEC 1982; regular size |
|                                 | Additional notes on a sample that is part of this study: IPUMS-CPS, ASEC 1983; regular size |
|                                 | Additional notes on a sample that is part of this study: IPUMS-CPS, ASEC 1984; regular size |
|                                 | Additional notes on a sample that is part of this study: IPUMS-CPS, ASEC 1985; regular size |
|                                 | Additional notes on a sample that is part of this study: IPUMS-CPS, ASEC 1986; regular size |
|                                 | Additional notes on a sample that is part of this study: IPUMS-CPS, ASEC 1987; regular size |



|  |                                                                                             |
|--|---------------------------------------------------------------------------------------------|
|  | Additional notes on a sample that is part of this study: IPUMS-CPS, ASEC 1988; regular size |
|  | Additional notes on a sample that is part of this study: IPUMS-CPS, ASEC 1989; regular size |
|  | Additional notes on a sample that is part of this study: IPUMS-CPS, ASEC 1990; regular size |
|  | Additional notes on a sample that is part of this study: IPUMS-CPS, ASEC 1991; regular size |
|  | Additional notes on a sample that is part of this study: IPUMS-CPS, ASEC 1992; regular size |
|  | Additional notes on a sample that is part of this study: IPUMS-CPS, ASEC 1993; regular size |
|  | Additional notes on a sample that is part of this study: IPUMS-CPS, ASEC 1994; regular size |
|  | Additional notes on a sample that is part of this study: IPUMS-CPS, ASEC 1995; regular size |
|  | Additional notes on a sample that is part of this study: IPUMS-CPS, ASEC 1996; regular size |
|  | Additional notes on a sample that is part of this study: IPUMS-CPS, ASEC 1997; regular size |
|  | Additional notes on a sample that is part of this study: IPUMS-CPS, ASEC 1998; regular size |
|  | Additional notes on a sample that is part of this study: IPUMS-CPS, ASEC 1999; regular size |
|  | Additional notes on a sample that is part of this study: IPUMS-CPS, ASEC 2000; regular size |
|  | Additional notes on a sample that is part of this study: IPUMS-CPS, ASEC 2001; regular size |
|  | Additional notes on a sample that is part of this study: IPUMS-CPS, ASEC 2002; regular size |
|  | Additional notes on a sample that is part of this study: IPUMS-CPS, ASEC 2003; regular size |
|  | Additional notes on a sample that is part of this study: IPUMS-CPS, ASEC 2004; regular size |

|  |                                                                                             |
|--|---------------------------------------------------------------------------------------------|
|  | Additional notes on a sample that is part of this study: IPUMS-CPS, ASEC 2005; regular size |
|  | Additional notes on a sample that is part of this study: IPUMS-CPS, ASEC 2006; regular size |
|  | Additional notes on a sample that is part of this study: IPUMS-CPS, ASEC 2007; regular size |
|  | Additional notes on a sample that is part of this study: IPUMS-CPS, ASEC 2008; regular size |
|  | Additional notes on a sample that is part of this study: IPUMS-CPS, ASEC 2009; regular size |
|  | Additional notes on a sample that is part of this study: IPUMS-CPS, ASEC 2010; regular size |
|  | Additional notes on a sample that is part of this study: IPUMS-CPS, ASEC 2011; regular size |
|  | Additional notes on a sample that is part of this study: IPUMS-CPS, ASEC 2012; regular size |
|  | Additional notes on a sample that is part of this study: IPUMS-CPS, ASEC 2013; regular size |
|  | Additional notes on a sample that is part of this study: IPUMS-CPS, ASEC 2014; regular size |
|  | Additional notes on a sample that is part of this study: IPUMS-CPS, ASEC 2015; regular size |
|  | Additional notes on a sample that is part of this study: IPUMS-CPS, ASEC 2016; regular size |

## Data Access - Use Statement

|                                    |                                                           |
|------------------------------------|-----------------------------------------------------------|
| <b>Confidentiality Declaration</b> |                                                           |
| None                               |                                                           |
| Contact Persons:                   | IPUMS-CPS                                                 |
| Affiliation:                       | Minnesota Population Center                               |
| URI:                               | <a href="http://cps.ipums.org/">http://cps.ipums.org/</a> |
| <b>Citation Requirement</b>        |                                                           |

Publications and research reports based on the IPUMS-CPS database must cite it appropriately. The citation should include the following:

Sarah Flood, Miriam King, Steven Ruggles, and J. Robert Warren. <i>Integrated Public Use Microdata Series, Current Population Survey: Version 4.0</i> [dataset]. Minneapolis, MN: University of Minnesota, 2015. <br/><http://doi.org/10.18128/D030.V4.0>.

The licensing agreement for use of IPUMS-CPS data requires that users supply us with the title and full citation for any publications, research reports, or educational materials making use of the data or documentation. Please add your citation to the IPUMS bibliography: <http://bibliography.ipums.org/>

### Conditions

Users of IPUMS-CPS data must agree to abide by the conditions of use. A user's license is valid for one year and may be renewed. Users must agree to the following conditions:

- (1) No fees may be charged for use or distribution of the data. All persons are granted a limited license to use these data, but you may not charge a fee for the data if you distribute it to others.
- (2) Cite IPUMS appropriately. For information on proper citation, refer to the citation requirement section of this DDI document.
- (3) Tell us about any work you do using the IPUMS. Publications, research reports, or presentations making use of IPUMS-CPS should be added to our Bibliography. Continued funding for the IPUMS depends on our ability to show our sponsor agencies that researchers are using the data for productive purposes.
- (4) Use it for GOOD -- never for EVIL.

### Disclaimer

The user of the data acknowledges that the original collector of the data, the authorized distributor of the data, and the relevant funding agency bear no responsibility for use of the data or for interpretations or inferences based upon such uses.

## Study Notes

### Notes

|       |                                                                                                      |
|-------|------------------------------------------------------------------------------------------------------|
| Note: | User-provided description: Revision of (Revision of (Revision of (Revision of (CPS_minimum_Wage1)))) |
|       | This extract is a revision of the user's previous extract, number 15.                                |

## § 3. File Description

### File

|                    |                   |
|--------------------|-------------------|
| File Name:         | cps_00016.dat     |
| Contents of Files: | Microdata records |

|                           |                                                                                             |
|---------------------------|---------------------------------------------------------------------------------------------|
| Type:                     | rectangular                                                                                 |
| File Type:                | ISO-8859-1 data file                                                                        |
| Data Format:              | fixed length fields                                                                         |
| Place of File Production: | Minnesota Population Center, 50 Willey Hall, 225 - 19th Avenue South, Minneapolis, MN 55455 |

## § 4. Variable Description

### Jump to Variable

1. [YEAR](#) (Survey year)
2. [SERIAL](#) (Household serial number)
3. [HWTSUPP](#) (Household weight, Supplement)
4. [CPSID](#) (CPSID, household record)
5. [STATEFIP](#) (State (FIPS code))
6. [STATECENSUS](#) (State (Census code))
7. [ASECFLAG](#) (Flag for ASEC)
8. [HFLAG](#) (Flag for the 3/8 file 2014)
9. [METRO](#) (Metropolitan central city status)
10. [COUNTY](#) (FIPS county code)
11. [METFIPS](#) (Metropolitan area FIPS code)
12. [CPI99](#) (CPI-U adjustment factor to 1999 dollars)
13. [MONTH](#) (Month)
14. [PERNUM](#) (Person number in sample unit)
15. [CPSIDP](#) (CPSID, person record)
16. [WTSUPP](#) (Supplement Weight)
17. [EARNWT](#) (Earnings weight)
18. [NCHILD](#) (Number of own children in household)
19. [AGE](#) (Age)
20. [SEX](#) (Sex)
21. [RACE](#) (Race)
22. [MARST](#) (Marital status)
23. [POPSTAT](#) (Adult civilian, armed forces, or child)
24. [BPL](#) (Birthplace)
25. [YRIMMIG](#) (Year of immigration)
26. [CITIZEN](#) (Citizenship status)
27. [NATIVITY](#) (Foreign birthplace or parentage)
28. [HISPAN](#) (Hispanic origin)
29. [EDUC](#) (Educational attainment recode)
30. [EDUC99](#) (Educational attainment, 1990)
31. [EMPSTAT](#) (Employment status)
32. [OCC](#) (Occupation)

33. [OCC2010](#) (Occupation, 2010 basis)
34. [OCC1990](#) (Occupation, 1990 basis)
35. [IND1990](#) (Industry, 1990 basis)
36. [OCC1950](#) (Occupation, 1950 basis)
37. [IND](#) (Industry)
38. [IND1950](#) (Industry, 1950 basis)
39. [CLASSWKR](#) (Class of worker)
40. [WKSWORK1](#) (Weeks worked last year)
41. [UHRSWORKLY](#) (Usual hours worked per week (last yr))
42. [UHRSWORKT](#) (Hours usually worked per week at all jobs)
43. [UHRSWORK1](#) (Hours usually worked per week at main job)
44. [AHRSWORKT](#) (Hours worked last week)
45. [HOURLWAGE](#) (Hourly wage)
46. [PAIDHOUR](#) (Paid by the hour)
47. [UNION](#) (Union membership)
48. [FIRMSIZE](#) (Number of employees)
49. [INCWAGE](#) (Wage and salary income)
50. [INCFARM](#) (Farm income)
51. [EARNWEEK](#) (Weekly earnings)
52. [OINCWAGE](#) (Earnings from other work included wage and salary earnings)
53. [WKSTAT](#) (Full or part time status)

### Variable: "YEAR"

|                         |                                                                                               |
|-------------------------|-----------------------------------------------------------------------------------------------|
| Name:                   | YEAR                                                                                          |
| Label:                  | Survey year                                                                                   |
| Variable Text:          | YEAR reports the year in which the survey was conducted. YEARP is repeated on person records. |
| Concept:                | Technical Variables -- HOUSEHOLD                                                              |
| Start Position:         | 1                                                                                             |
| End Position:           | 4                                                                                             |
| Width:                  | 4                                                                                             |
| Variable Format:        | numeric                                                                                       |
| Implied Decimal Places: | 0                                                                                             |
| Coder Instructions:     | YEAR is a 4-digit numeric value.                                                              |

**Variable: "SERIAL"**

|                         |                                                                                                                                                                                                                                                                                                                                                                                                                                                                                                                                                                                                 |
|-------------------------|-------------------------------------------------------------------------------------------------------------------------------------------------------------------------------------------------------------------------------------------------------------------------------------------------------------------------------------------------------------------------------------------------------------------------------------------------------------------------------------------------------------------------------------------------------------------------------------------------|
| Name:                   | SERIAL                                                                                                                                                                                                                                                                                                                                                                                                                                                                                                                                                                                          |
| Label:                  | Household serial number                                                                                                                                                                                                                                                                                                                                                                                                                                                                                                                                                                         |
| Variable Text:          | <p>SERIAL is an identifying number unique to each household in a given survey month and year. All person records are assigned the same serial number as the household record they follow. A combination of YEAR, MONTH, and SERIAL provides a within-sample unique identifier for every household in IPUMS-CPS; YEAR, SERIAL, and PERNUM uniquely identify every person in the database within sample.</p> <p>SERIAL is a new value generated for IPUMS-CPS and should not be confused with the household serial number created by the Census Bureau and included in the original CPS data.</p> |
| Concept:                | Technical Variables -- HOUSEHOLD                                                                                                                                                                                                                                                                                                                                                                                                                                                                                                                                                                |
| Start Position:         | 5                                                                                                                                                                                                                                                                                                                                                                                                                                                                                                                                                                                               |
| End Position:           | 9                                                                                                                                                                                                                                                                                                                                                                                                                                                                                                                                                                                               |
| Width:                  | 5                                                                                                                                                                                                                                                                                                                                                                                                                                                                                                                                                                                               |
| Variable Format:        | numeric                                                                                                                                                                                                                                                                                                                                                                                                                                                                                                                                                                                         |
| Implied Decimal Places: | 0                                                                                                                                                                                                                                                                                                                                                                                                                                                                                                                                                                                               |
| Coder Instructions:     | SERIAL is a 5-digit numeric variable.                                                                                                                                                                                                                                                                                                                                                                                                                                                                                                                                                           |

**Variable: "HWTSUPP"**

|                |                                                                                                                                                                                                                                                                                                                                                                                                                                                                                                                                                                                                                                                                                                                                                                                                                     |
|----------------|---------------------------------------------------------------------------------------------------------------------------------------------------------------------------------------------------------------------------------------------------------------------------------------------------------------------------------------------------------------------------------------------------------------------------------------------------------------------------------------------------------------------------------------------------------------------------------------------------------------------------------------------------------------------------------------------------------------------------------------------------------------------------------------------------------------------|
| Name:          | HWTSUPP                                                                                                                                                                                                                                                                                                                                                                                                                                                                                                                                                                                                                                                                                                                                                                                                             |
| Label:         | Household weight, Supplement                                                                                                                                                                                                                                                                                                                                                                                                                                                                                                                                                                                                                                                                                                                                                                                        |
| Variable Text: | <p>HWTSUPP is a household-level weight that should be used to generate statistics about households in March Annual Social and Economic (ASEC) Supplement data. The CPS uses a complex stratified sampling scheme, and HWTSUPP must be used to produce unbiased household-level statistics from the IPUMS-CPS ASEC data. For analyses of non-ASEC data, researchers should use HWTFINL. For individual-level analyses, researchers should use WTFINL, WTSUPP, or EARNWT.</p> <p>HWTSUPP generally has the same value as WTSUPP for the household head or reference person. Vacant housing units and households that could not be interviewed due to residents' absence or refusal to participate have a value of zero in HWTSUPP; such sampled units were included in the public use CPS data beginning in 1988.</p> |

|                         |                                                                                                                                                                                                                                                                                                                                                                                                                                                                                                                                                                                                                                                                                                                                                                                                                                                                                                                                                                                                                                                                                                                                                                                                                                                                                                                                                                                                                                                                                                                                                     |
|-------------------------|-----------------------------------------------------------------------------------------------------------------------------------------------------------------------------------------------------------------------------------------------------------------------------------------------------------------------------------------------------------------------------------------------------------------------------------------------------------------------------------------------------------------------------------------------------------------------------------------------------------------------------------------------------------------------------------------------------------------------------------------------------------------------------------------------------------------------------------------------------------------------------------------------------------------------------------------------------------------------------------------------------------------------------------------------------------------------------------------------------------------------------------------------------------------------------------------------------------------------------------------------------------------------------------------------------------------------------------------------------------------------------------------------------------------------------------------------------------------------------------------------------------------------------------------------------|
|                         | <p>Estimates on the entire population are prepared by projecting forward the resident population from the last available census. These projections are derived by updating the demographic census data from a number of other data sources that account for death, births and net migration. About 3 years after every census (i.e. 2003 for the 2000 Census and 2013 for the 2010 Census), the Census Bureau updates its independent population control and provides a new weight for the relevant years.</p> <p>Two important points should be noted here. First, the lag between when the Census is conducted and when the CPS weights are updated is about 3 years. While the Census data are being processed, the CPS files are made available using the weighting scheme from the US Census prior to the latest Census. Second, once the files are updated, the old weights become obsolete and are replaced in the IPUMS data extract system. Published estimates from the lag years that use the old weights are not always updated. For example, 2010 poverty estimates were released in ASEC using the 2000 population controls. Once the 2010 population controls were made available, IPUMS-CPS replaced the ASEC 2010, 2011, and 2012 weights that are based on the 2000 population control with weights that are based on the 2010 population controls.</p> <p>IPUMS-CPS makes available only the most up-to-date weights. The old values are available here: <a href="#">Old SPM and Weights Values</a> [URL omitted from DDI.].</p> |
| Concept:                | Technical Variables -- HOUSEHOLD                                                                                                                                                                                                                                                                                                                                                                                                                                                                                                                                                                                                                                                                                                                                                                                                                                                                                                                                                                                                                                                                                                                                                                                                                                                                                                                                                                                                                                                                                                                    |
| Start Position:         | 10                                                                                                                                                                                                                                                                                                                                                                                                                                                                                                                                                                                                                                                                                                                                                                                                                                                                                                                                                                                                                                                                                                                                                                                                                                                                                                                                                                                                                                                                                                                                                  |
| End Position:           | 19                                                                                                                                                                                                                                                                                                                                                                                                                                                                                                                                                                                                                                                                                                                                                                                                                                                                                                                                                                                                                                                                                                                                                                                                                                                                                                                                                                                                                                                                                                                                                  |
| Width:                  | 10                                                                                                                                                                                                                                                                                                                                                                                                                                                                                                                                                                                                                                                                                                                                                                                                                                                                                                                                                                                                                                                                                                                                                                                                                                                                                                                                                                                                                                                                                                                                                  |
| Variable Format:        | numeric                                                                                                                                                                                                                                                                                                                                                                                                                                                                                                                                                                                                                                                                                                                                                                                                                                                                                                                                                                                                                                                                                                                                                                                                                                                                                                                                                                                                                                                                                                                                             |
| Implied Decimal Places: | 4                                                                                                                                                                                                                                                                                                                                                                                                                                                                                                                                                                                                                                                                                                                                                                                                                                                                                                                                                                                                                                                                                                                                                                                                                                                                                                                                                                                                                                                                                                                                                   |
| Coder Instructions:     | HWTSUPP is a 10-digit numeric variable with four implied decimals. That is, 1234567890 should be interpreted as 123456.7890. The IPUMS command files automatically divide HWTSUPP by 10,000, so no further adjustment is needed.                                                                                                                                                                                                                                                                                                                                                                                                                                                                                                                                                                                                                                                                                                                                                                                                                                                                                                                                                                                                                                                                                                                                                                                                                                                                                                                    |

### Variable: "CPSID"

|                |                                                                                                                                                                                                                                                                                                                                                                                                                                                                                                                 |
|----------------|-----------------------------------------------------------------------------------------------------------------------------------------------------------------------------------------------------------------------------------------------------------------------------------------------------------------------------------------------------------------------------------------------------------------------------------------------------------------------------------------------------------------|
| Name:          | CPSID                                                                                                                                                                                                                                                                                                                                                                                                                                                                                                           |
| Label:         | CPSID, household record                                                                                                                                                                                                                                                                                                                                                                                                                                                                                         |
| Variable Text: | CPSID is an IPUMS-CPS defined variable that uniquely identifies households across CPS samples. The first six digits of CPSID index the four-digit year and two-digit month that the household was first in the CPS. CPSID allows users to link a household record across samples, based on the 4-8-4 rotation pattern, by assigning a unique CPSID value based on a combination of household identifiers. CPSID will only ever appear for a maximum of 8 times, which is the number of times a household may be |

|                         |                                                                                                                                                                                                                                                                                                                                                                                                                                                                                                                                                                                                                                                                                                                                                                     |
|-------------------------|---------------------------------------------------------------------------------------------------------------------------------------------------------------------------------------------------------------------------------------------------------------------------------------------------------------------------------------------------------------------------------------------------------------------------------------------------------------------------------------------------------------------------------------------------------------------------------------------------------------------------------------------------------------------------------------------------------------------------------------------------------------------|
|                         | <p>observed in the CPS survey (as indexed by MIS). In some cases, a household will appear fewer than 8 times due to migration, mortality, non-response, and recording errors. CPSID Extensive documentation about the creation of CPSID is available elsewhere [URL omitted from DDI].</p> <p>CPSID may also be used to link ASEC respondents who are in the March Basic Monthly file to other months of CPS data. This linking is made possible by IPUMS through the creation of MARBASECIDP. Users should note that ASEC oversample households (as indicated by ASECOVERH) will always have a CPSID value of 0.</p> <p>Users may also want to see CPSIDP for more information about linking individuals across time using a person-specific version of CPSID.</p> |
| Concept:                | Linking Variables -- HOUSEHOLD                                                                                                                                                                                                                                                                                                                                                                                                                                                                                                                                                                                                                                                                                                                                      |
| Start Position:         | 20                                                                                                                                                                                                                                                                                                                                                                                                                                                                                                                                                                                                                                                                                                                                                                  |
| End Position:           | 33                                                                                                                                                                                                                                                                                                                                                                                                                                                                                                                                                                                                                                                                                                                                                                  |
| Width:                  | 14                                                                                                                                                                                                                                                                                                                                                                                                                                                                                                                                                                                                                                                                                                                                                                  |
| Variable Format:        | numeric                                                                                                                                                                                                                                                                                                                                                                                                                                                                                                                                                                                                                                                                                                                                                             |
| Implied Decimal Places: | 0                                                                                                                                                                                                                                                                                                                                                                                                                                                                                                                                                                                                                                                                                                                                                                   |
| Coder Instructions:     | CPSID is a 14-digit numeric variable.                                                                                                                                                                                                                                                                                                                                                                                                                                                                                                                                                                                                                                                                                                                               |

### Variable: "STATEFIP"

|                  |                                                                                                                                                                          |
|------------------|--------------------------------------------------------------------------------------------------------------------------------------------------------------------------|
| Name:            | STATEFIP                                                                                                                                                                 |
| Label:           | State (FIPS code)                                                                                                                                                        |
| Variable Text:   | STATEFIP identifies the household's state of residence, using the Federal Information Processing Standards (FIPS) coding scheme, which orders the states alphabetically. |
| Concept:         | Geographic Variables -- HOUSEHOLD                                                                                                                                        |
| Start Position:  | 34                                                                                                                                                                       |
| End Position:    | 35                                                                                                                                                                       |
| Width:           | 2                                                                                                                                                                        |
| Variable Format: | numeric                                                                                                                                                                  |



Implied  
Decimal Places:

0

**Categories**

| <b>Value</b> | <b>Label</b>         |
|--------------|----------------------|
| 01           | Alabama              |
| 02           | Alaska               |
| 04           | Arizona              |
| 05           | Arkansas             |
| 06           | California           |
| 08           | Colorado             |
| 09           | Connecticut          |
| 10           | Delaware             |
| 11           | District of Columbia |
| 12           | Florida              |
| 13           | Georgia              |
| 15           | Hawaii               |
| 16           | Idaho                |
| 17           | Illinois             |
| 18           | Indiana              |
| 19           | Iowa                 |
| 20           | Kansas               |
| 21           | Kentucky             |
| 22           | Louisiana            |
| 23           | Maine                |

|    |                |
|----|----------------|
| 24 | Maryland       |
| 25 | Massachusetts  |
| 26 | Michigan       |
| 27 | Minnesota      |
| 28 | Mississippi    |
| 29 | Missouri       |
| 30 | Montana        |
| 31 | Nebraska       |
| 32 | Nevada         |
| 33 | New Hampshire  |
| 34 | New Jersey     |
| 35 | New Mexico     |
| 36 | New York       |
| 37 | North Carolina |
| 38 | North Dakota   |
| 39 | Ohio           |
| 40 | Oklahoma       |
| 41 | Oregon         |
| 42 | Pennsylvania   |
| 44 | Rhode Island   |
| 45 | South Carolina |
| 46 | South Dakota   |
| 47 | Tennessee      |
| 48 | Texas          |

|    |                                                        |
|----|--------------------------------------------------------|
| 49 | Utah                                                   |
| 50 | Vermont                                                |
| 51 | Virginia                                               |
| 53 | Washington                                             |
| 54 | West Virginia                                          |
| 55 | Wisconsin                                              |
| 56 | Wyoming                                                |
| 61 | Maine-New Hampshire-Vermont                            |
| 65 | Montana-Idaho-Wyoming                                  |
| 68 | Alaska-Hawaii                                          |
| 69 | Nebraska-North Dakota-South Dakota                     |
| 70 | Maine-Massachusetts-New Hampshire-Rhode Island-Vermont |
| 71 | Michigan-Wisconsin                                     |
| 72 | Minnesota-Iowa                                         |
| 73 | Nebraska-North Dakota-South Dakota-Kansas              |
| 74 | Delaware-Virginia                                      |
| 75 | North Carolina-South Carolina                          |
| 76 | Alabama-Mississippi                                    |
| 77 | Arkansas-Oklahoma                                      |
| 78 | Arizona-New Mexico-Colorado                            |
| 79 | Idaho-Wyoming-Utah-Montana-Nevada                      |
| 80 | Alaska-Washington-Hawaii                               |
| 81 | New Hampshire-Maine-Vermont-Rhode Island               |
| 83 | South Carolina-Georgia                                 |

|    |                                                           |
|----|-----------------------------------------------------------|
| 84 | Kentucky-Tennessee                                        |
| 85 | Arkansas-Louisiana-Oklahoma                               |
| 87 | Iowa-N Dakota-S Dakota-Nebraska-Kansas-Minnesota-Missouri |
| 88 | Washington-Oregon-Alaska-Hawaii                           |
| 89 | Montana-Wyoming-Colorado-New Mexico-Utah-Nevada-Arizona   |
| 90 | Delaware-Maryland-Virginia-West Virginia                  |
| 99 | State not identified                                      |

**Variable: "STATECENSUS"**

|                         |                                                                                     |
|-------------------------|-------------------------------------------------------------------------------------|
| Name:                   | STATECENSUS                                                                         |
| Label:                  | State (Census code)                                                                 |
| Variable Text:          | STATECENSUS identifies the household's state of residence using Census state codes. |
| Concept:                | Geographic Variables -- HOUSEHOLD                                                   |
| Start Position:         | 36                                                                                  |
| End Position:           | 37                                                                                  |
| Width:                  | 2                                                                                   |
| Variable Format:        | numeric                                                                             |
| Implied Decimal Places: | 0                                                                                   |

**Categories**

| Value | Label   |
|-------|---------|
| 00    | Unknown |
| 11    | Maine   |

|    |                                                                         |
|----|-------------------------------------------------------------------------|
| 12 | New Hampshire                                                           |
| 13 | Vermont                                                                 |
| 14 | Massachusetts                                                           |
| 15 | Rhode Island                                                            |
| 16 | Connecticut                                                             |
| 19 | Maine, New Hampshire, Vermont, Rhode Island                             |
| 21 | New York                                                                |
| 22 | New Jersey                                                              |
| 23 | Pennsylvania                                                            |
| 31 | Ohio                                                                    |
| 32 | Indiana                                                                 |
| 33 | Illinois                                                                |
| 34 | Michigan                                                                |
| 35 | Wisconsin                                                               |
| 39 | Michigan, Wisconsin                                                     |
| 41 | Minnesota                                                               |
| 42 | Iowa                                                                    |
| 43 | Missouri                                                                |
| 44 | North Dakota                                                            |
| 45 | South Dakota                                                            |
| 46 | Nebraska                                                                |
| 47 | Kansas                                                                  |
| 49 | Minnesota, Iowa, Missouri, North Dakota, South Dakota, Nebraska, Kansas |
| 50 | Delaware, Maryland, Virginia, West Virginia                             |

|    |                               |
|----|-------------------------------|
| 51 | Delaware                      |
| 52 | Maryland                      |
| 53 | District of Columbia          |
| 54 | Virginia                      |
| 55 | West Virginia                 |
| 56 | North Carolina                |
| 57 | South Carolina                |
| 58 | Georgia                       |
| 59 | Florida                       |
| 60 | South Carolina, Georgia       |
| 61 | Kentucky                      |
| 62 | Tennessee                     |
| 63 | Alabama                       |
| 64 | Mississippi                   |
| 67 | Kentucky, Tennessee           |
| 69 | Alabama, Mississippi          |
| 71 | Arkansas                      |
| 72 | Louisiana                     |
| 73 | Oklahoma                      |
| 74 | Texas                         |
| 79 | Arkansas, Louisiana, Oklahoma |
| 81 | Montana                       |
| 82 | Idaho                         |
| 83 | Wyoming                       |

|    |                                                                      |
|----|----------------------------------------------------------------------|
| 84 | Colorado                                                             |
| 85 | New Mexico                                                           |
| 86 | Arizona                                                              |
| 87 | Utah                                                                 |
| 88 | Nevada                                                               |
| 89 | Montana, Idaho, Wyoming, Colorado, New Mexico, Arizona, Utah, Nevada |
| 91 | Washington                                                           |
| 92 | Oregon                                                               |
| 93 | California                                                           |
| 94 | Alaska                                                               |
| 95 | Hawaii                                                               |
| 99 | Washington, Oregon, Alaska, Hawaii                                   |

**Variable: "ASECFLAG"**

|                  |                                                                                                                                                                                                                                                                                                |
|------------------|------------------------------------------------------------------------------------------------------------------------------------------------------------------------------------------------------------------------------------------------------------------------------------------------|
| Name:            | ASECFLAG                                                                                                                                                                                                                                                                                       |
| Label:           | Flag for ASEC                                                                                                                                                                                                                                                                                  |
| Variable Text:   | ASECFLAG indicates whether the respondent is part of the ASEC or the March Basic. This variable is useful for users who wish to distinguish ASEC and March Basic files in their extracts. See further information [URL omitted from DDI.] about the ASEC versus the March Basic Monthly Files. |
| Concept:         | Technical Variables -- HOUSEHOLD                                                                                                                                                                                                                                                               |
| Start Position:  | 38                                                                                                                                                                                                                                                                                             |
| End Position:    | 38                                                                                                                                                                                                                                                                                             |
| Width:           | 1                                                                                                                                                                                                                                                                                              |
| Variable Format: | numeric                                                                                                                                                                                                                                                                                        |

| Implied<br>Decimal<br>Places:                                                                                                                                                         | 0           |       |       |   |      |   |             |
|---------------------------------------------------------------------------------------------------------------------------------------------------------------------------------------|-------------|-------|-------|---|------|---|-------------|
| <b>Categories</b>                                                                                                                                                                     |             |       |       |   |      |   |             |
| <table border="1"> <thead> <tr> <th>Value</th> <th>Label</th> </tr> </thead> <tbody> <tr> <td>1</td> <td>ASEC</td> </tr> <tr> <td>2</td> <td>March Basic</td> </tr> </tbody> </table> |             | Value | Label | 1 | ASEC | 2 | March Basic |
| Value                                                                                                                                                                                 | Label       |       |       |   |      |   |             |
| 1                                                                                                                                                                                     | ASEC        |       |       |   |      |   |             |
| 2                                                                                                                                                                                     | March Basic |       |       |   |      |   |             |

**Variable: "HFLAG"**

|                               |                                                                                                                                                                                                                                                                                     |
|-------------------------------|-------------------------------------------------------------------------------------------------------------------------------------------------------------------------------------------------------------------------------------------------------------------------------------|
| Name:                         | HFLAG                                                                                                                                                                                                                                                                               |
| Label:                        | Flag for the 3/8 file 2014                                                                                                                                                                                                                                                          |
| Variable<br>Text:             | HFLAG indicates whether the respondent is part of the 3/8 redesign in the 2014 ASEC sample. This variable is useful for users who wish to analyze income and SPM variables in the 2014 ASEC sample. See further information [URL omitted from DDI.] about the 2014 survey redesign. |
| Concept:                      | Technical Variables -- HOUSEHOLD                                                                                                                                                                                                                                                    |
| Start<br>Position:            | 39                                                                                                                                                                                                                                                                                  |
| End Position:                 | 39                                                                                                                                                                                                                                                                                  |
| Width:                        | 1                                                                                                                                                                                                                                                                                   |
| Variable<br>Format:           | numeric                                                                                                                                                                                                                                                                             |
| Implied<br>Decimal<br>Places: | 0                                                                                                                                                                                                                                                                                   |

| <b>Categories</b>                                                                                                                              |          |       |       |   |          |
|------------------------------------------------------------------------------------------------------------------------------------------------|----------|-------|-------|---|----------|
| <table border="1"> <thead> <tr> <th>Value</th> <th>Label</th> </tr> </thead> <tbody> <tr> <td>0</td> <td>5/8 file</td> </tr> </tbody> </table> |          | Value | Label | 0 | 5/8 file |
| Value                                                                                                                                          | Label    |       |       |   |          |
| 0                                                                                                                                              | 5/8 file |       |       |   |          |



1

3/8 file

**Variable: "METRO"**

|                         |                                                                                                                                                                                                                                                                                                                                                       |
|-------------------------|-------------------------------------------------------------------------------------------------------------------------------------------------------------------------------------------------------------------------------------------------------------------------------------------------------------------------------------------------------|
| Name:                   | METRO                                                                                                                                                                                                                                                                                                                                                 |
| Label:                  | Metropolitan central city status                                                                                                                                                                                                                                                                                                                      |
| Variable Text:          | METRO indicates whether a household was located in a metropolitan area. For households within metropolitan areas, METRO specifies whether the housing unit was inside or outside the central city of the metropolitan area. Information on metropolitan status was added by the Census Bureau, rather than being directly collected from respondents. |
| Concept:                | Geographic Variables -- HOUSEHOLD                                                                                                                                                                                                                                                                                                                     |
| Start Position:         | 40                                                                                                                                                                                                                                                                                                                                                    |
| End Position:           | 40                                                                                                                                                                                                                                                                                                                                                    |
| Width:                  | 1                                                                                                                                                                                                                                                                                                                                                     |
| Variable Format:        | numeric                                                                                                                                                                                                                                                                                                                                               |
| Implied Decimal Places: | 0                                                                                                                                                                                                                                                                                                                                                     |

**Categories**

| Value | Label                       |
|-------|-----------------------------|
| 0     | Not identifiable            |
| 1     | Not in metro area           |
| 2     | Central city                |
| 3     | Outside central city        |
| 4     | Central city status unknown |
| 9     | Missing/Unknown             |

**Variable: "COUNTY"**

|                         |                                                                                                                                                                                                                                                                                                                                                                                                                                                   |
|-------------------------|---------------------------------------------------------------------------------------------------------------------------------------------------------------------------------------------------------------------------------------------------------------------------------------------------------------------------------------------------------------------------------------------------------------------------------------------------|
| Name:                   | COUNTY                                                                                                                                                                                                                                                                                                                                                                                                                                            |
| Label:                  | FIPS county code                                                                                                                                                                                                                                                                                                                                                                                                                                  |
| Variable Text:          | COUNTY gives the FIPS state and county codes for the respondent's county of residence. To preserve respondent confidentiality, not all counties are identified; however, about 45 percent of households in recent years are located in a county that is identified.                                                                                                                                                                               |
| Concept:                | Geographic Variables -- HOUSEHOLD                                                                                                                                                                                                                                                                                                                                                                                                                 |
| Start Position:         | 41                                                                                                                                                                                                                                                                                                                                                                                                                                                |
| End Position:           | 45                                                                                                                                                                                                                                                                                                                                                                                                                                                |
| Width:                  | 5                                                                                                                                                                                                                                                                                                                                                                                                                                                 |
| Variable Format:        | numeric                                                                                                                                                                                                                                                                                                                                                                                                                                           |
| Implied Decimal Places: | 0                                                                                                                                                                                                                                                                                                                                                                                                                                                 |
| Coder Instructions:     | <p>COUNTY is a five-digit numeric variable. The first two digits give the FIPS state code; the last three digits give the FIPS county code. For a list of counties identified in each state, follow the following links for the appropriate years:</p> <p>September, 1995-April, 2004 [URL omitted from DDI.]<br/> May, 2004-July,2005 [URL omitted from DDI.]<br/> August, 2005 onward [URL omitted from DDI.]</p> <p>00000 = Not identified</p> |

**Variable: "METFIPS"**

|                |                                                                                                                                                                                                                                                                                                                                                                                                                                                                                                                                                                                                                                                                                                                 |
|----------------|-----------------------------------------------------------------------------------------------------------------------------------------------------------------------------------------------------------------------------------------------------------------------------------------------------------------------------------------------------------------------------------------------------------------------------------------------------------------------------------------------------------------------------------------------------------------------------------------------------------------------------------------------------------------------------------------------------------------|
| Name:          | METFIPS                                                                                                                                                                                                                                                                                                                                                                                                                                                                                                                                                                                                                                                                                                         |
| Label:         | Metropolitan area FIPS code                                                                                                                                                                                                                                                                                                                                                                                                                                                                                                                                                                                                                                                                                     |
| Variable Text: | <p>METFIPS gives the original (unrecoded) codes for the respondent's metropolitan area of residence. For the same variable recoded to FIPS codes from the 1990 census, see (METAREA) (definitions of metropolitan areas can change over time, however). METFIPS information was added to the ASEC CPS data by the Census Bureau, not collected from respondents.</p> <p>Not all metropolitan areas are identified: see under "Codes" for more information. Note also that some component counties are not included in the CPS sample of households in certain metropolitan areas. See the "Specific Metropolitan Identifiers" Appendix of the appropriate month's technical documentation [URL omitted from</p> |

|                         |                                                                                                                                                                                                                                                                                                                                                                                                                                                                                                                                                                                                                                                                                                                                                                                                                                                                                                         |
|-------------------------|---------------------------------------------------------------------------------------------------------------------------------------------------------------------------------------------------------------------------------------------------------------------------------------------------------------------------------------------------------------------------------------------------------------------------------------------------------------------------------------------------------------------------------------------------------------------------------------------------------------------------------------------------------------------------------------------------------------------------------------------------------------------------------------------------------------------------------------------------------------------------------------------------------|
|                         | <p>DDI.] for more information on whether a specific metropolitan area sample has excluded components. For more information on the definitions and components of metropolitan areas over time, see the Census Bureau website [URL omitted from DDI.]; for the current metropolitan area definitions, see here [URL omitted from DDI.].</p> <p>Note that the Census Bureau warns: "One set of estimates that can be produced from CPS microdata files should be treated with caution. These are estimates for individual metropolitan areas. Although estimates for the larger areas such as New York, Los Angeles, and so forth, should be fairly accurate and valid for a multitude of uses, estimates for the smaller metropolitan areas (those with populations under 500,000) should be used with caution because of the relatively large sampling variability associated with these estimates."</p> |
| Concept:                | Geographic Variables -- HOUSEHOLD                                                                                                                                                                                                                                                                                                                                                                                                                                                                                                                                                                                                                                                                                                                                                                                                                                                                       |
| Start Position:         | 46                                                                                                                                                                                                                                                                                                                                                                                                                                                                                                                                                                                                                                                                                                                                                                                                                                                                                                      |
| End Position:           | 50                                                                                                                                                                                                                                                                                                                                                                                                                                                                                                                                                                                                                                                                                                                                                                                                                                                                                                      |
| Width:                  | 5                                                                                                                                                                                                                                                                                                                                                                                                                                                                                                                                                                                                                                                                                                                                                                                                                                                                                                       |
| Variable Format:        | numeric                                                                                                                                                                                                                                                                                                                                                                                                                                                                                                                                                                                                                                                                                                                                                                                                                                                                                                 |
| Implied Decimal Places: | 0                                                                                                                                                                                                                                                                                                                                                                                                                                                                                                                                                                                                                                                                                                                                                                                                                                                                                                       |
| Coder Instructions:     | <p>For a list of metropolitan areas identified and the corresponding codes, consult the links below for the appropriate time period. Note that some metropolitan areas are not available in all months of a time period.</p> <p>1962 (ASEC) [URL omitted from DDI.]<br/> 1963-1967 (ASEC) [URL omitted from DDI.]<br/> 1968-1972 (ASEC) [URL omitted from DDI.]<br/> 1973-1975 (ASEC) [URL omitted from DDI.]<br/> 1976 (ASEC) [URL omitted from DDI.]<br/> 1977-1985 (ASEC) [URL omitted from DDI.]<br/> 1986-1987 (ASEC) [URL omitted from DDI.]<br/> 1988-March, 1995 [URL omitted from DDI.]<br/> September, 1995-April, 2004 [URL omitted from DDI.]<br/> May, 2004 -April, 2014 [URL omitted from DDI.]<br/> May, 2014 onward [URL omitted from DDI.]</p> <p>99998 = Unidentified or nonmetropolitan<br/> 99999 = Missing data</p>                                                                |

**Variable: "CPI99"**

|       |       |
|-------|-------|
| Name: | CPI99 |
|-------|-------|

|                         |                                                                                                                                                                                                                                                                                                                                                                                                                                                                                                                                                                  |
|-------------------------|------------------------------------------------------------------------------------------------------------------------------------------------------------------------------------------------------------------------------------------------------------------------------------------------------------------------------------------------------------------------------------------------------------------------------------------------------------------------------------------------------------------------------------------------------------------|
| Label:                  | CPI-U adjustment factor to 1999 dollars                                                                                                                                                                                                                                                                                                                                                                                                                                                                                                                          |
| Variable Text:          | <p>CPI99 provides the CPI-U multiplier (available from the Bureau of Labor Statistics [URL omitted from DDI.]) to convert dollar figures to constant 1999 dollars. (This corresponds to the dollar amounts in the 2000 CPS, which inquired about income in 1999.) Multiplying dollar amounts by this variable (which is constant within years) will render them comparable across time and thus suitable for multivariate analysis.</p> <p>For more information on how to use CPI99, please see the IPUMS inflation adjustment page [URL omitted from DDI.].</p> |
| Concept:                | Technical Variables -- HOUSEHOLD                                                                                                                                                                                                                                                                                                                                                                                                                                                                                                                                 |
| Start Position:         | 51                                                                                                                                                                                                                                                                                                                                                                                                                                                                                                                                                               |
| End Position:           | 54                                                                                                                                                                                                                                                                                                                                                                                                                                                                                                                                                               |
| Width:                  | 4                                                                                                                                                                                                                                                                                                                                                                                                                                                                                                                                                                |
| Variable Format:        | numeric                                                                                                                                                                                                                                                                                                                                                                                                                                                                                                                                                          |
| Implied Decimal Places: | 3                                                                                                                                                                                                                                                                                                                                                                                                                                                                                                                                                                |
| Coder Instructions:     | CPI99 is a 4-digit variable with three implied decimal places.                                                                                                                                                                                                                                                                                                                                                                                                                                                                                                   |

### Variable: "MONTH"

|                         |                                                          |
|-------------------------|----------------------------------------------------------|
| Name:                   | MONTH                                                    |
| Label:                  | Month                                                    |
| Variable Text:          | MONTH indicates the calendar month of the CPS interview. |
| Concept:                | Technical Variables -- HOUSEHOLD                         |
| Start Position:         | 55                                                       |
| End Position:           | 56                                                       |
| Width:                  | 2                                                        |
| Variable Format:        | numeric                                                  |
| Implied Decimal Places: | 0                                                        |

**Categories**

| Value | Label     |
|-------|-----------|
| 01    | January   |
| 02    | February  |
| 03    | March     |
| 04    | April     |
| 05    | May       |
| 06    | June      |
| 07    | July      |
| 08    | August    |
| 09    | September |
| 10    | October   |
| 11    | November  |
| 12    | December  |

**Variable: "PERNUM"**

|                 |                                                                                                                                                                                                                                                                                                       |
|-----------------|-------------------------------------------------------------------------------------------------------------------------------------------------------------------------------------------------------------------------------------------------------------------------------------------------------|
| Name:           | PERNUM                                                                                                                                                                                                                                                                                                |
| Label:          | Person number in sample unit                                                                                                                                                                                                                                                                          |
| Variable Text:  | PERNUM numbers all persons within each household consecutively (starting with "1") in the order in which they are listed in the original CPS data. When combined with YEAR , MONTH, and SERIAL, PERNUM uniquely identifies each person within IPUMS-CPS samples, though not across IPUMS-CPS samples. |
| Concept:        | Technical Variables -- PERSON                                                                                                                                                                                                                                                                         |
| Start Position: | 57                                                                                                                                                                                                                                                                                                    |
| End Position:   | 58                                                                                                                                                                                                                                                                                                    |
| Width:          | 2                                                                                                                                                                                                                                                                                                     |

|                         |                                       |
|-------------------------|---------------------------------------|
| Variable Format:        | numeric                               |
| Implied Decimal Places: | 0                                     |
| Coder Instructions:     | PERNUM is a 2-digit numeric variable. |

**Variable: "CPSIDP"**

|                 |                                                                                                                                                                                                                                                                                                                                                                                                                                                                                                                                                                                                                                                                                                                                                                                                                                                                                                                                                                                                                                                                                                                                                                                                                                                                                                                                                                                                                                                                                                                                                                                                                                                                                                                                                                                                                                                                                                                                                                                                                                  |
|-----------------|----------------------------------------------------------------------------------------------------------------------------------------------------------------------------------------------------------------------------------------------------------------------------------------------------------------------------------------------------------------------------------------------------------------------------------------------------------------------------------------------------------------------------------------------------------------------------------------------------------------------------------------------------------------------------------------------------------------------------------------------------------------------------------------------------------------------------------------------------------------------------------------------------------------------------------------------------------------------------------------------------------------------------------------------------------------------------------------------------------------------------------------------------------------------------------------------------------------------------------------------------------------------------------------------------------------------------------------------------------------------------------------------------------------------------------------------------------------------------------------------------------------------------------------------------------------------------------------------------------------------------------------------------------------------------------------------------------------------------------------------------------------------------------------------------------------------------------------------------------------------------------------------------------------------------------------------------------------------------------------------------------------------------------|
| Name:           | CPSIDP                                                                                                                                                                                                                                                                                                                                                                                                                                                                                                                                                                                                                                                                                                                                                                                                                                                                                                                                                                                                                                                                                                                                                                                                                                                                                                                                                                                                                                                                                                                                                                                                                                                                                                                                                                                                                                                                                                                                                                                                                           |
| Label:          | CPSID, person record                                                                                                                                                                                                                                                                                                                                                                                                                                                                                                                                                                                                                                                                                                                                                                                                                                                                                                                                                                                                                                                                                                                                                                                                                                                                                                                                                                                                                                                                                                                                                                                                                                                                                                                                                                                                                                                                                                                                                                                                             |
| Variable Text:  | <p>CPSIDP is an IPUMS-CPS defined variable that uniquely identifies individuals across CPS samples. The first six digits of CPSIDP index the four-digit year and two-digit month that the household was first in the CPS. CPSIDP allows users to link a respondent appearing with a designated household roster line number (LINENO) across samples, based on the 4-8-4 rotation pattern, by assigning a unique CPSIDP value to this line number. CPSIDP will only ever appear for a maximum of 8 times, which is the number of times a household may be observed in the CPS survey (as indexed by MISH). In some cases, individuals will appear fewer than 8 times due to migration, mortality, non-response, and recording errors. Extensive documentation about the creation of CPSIDP is available elsewhere [URL omitted from DDI].</p> <p>Users should note that it is important to verify CPSIDP linkages with AGE, SEX, and RACE. In some cases CPSIDP will result in erroneous links, which are due to errors in the source data. Cases with the same CPSIDP value may also have inconsistent responses across samples due to errors on the part of the respondent or in recording the response. Ultimately, it is up to the individual researcher to determine the acceptability of the linkages made using CPSIDP.</p> <p>CPSIDP may also be used to link ASEC respondents who are in the March Basic Monthly file to other months of CPS data. This linking is made possible by IPUMS through the creation of MARBASECIDP.</p> <p>To get started using CPSIDP, users may want to sort their data file by CPSIDP and MISH to create a person-time file.</p> <p>Users should take care when including the March Basic or ASEC as part of their linking. Respondents who are part of the ASEC oversample (as indicated by ASECOVERP) have a CPSIDP value of 0. For further information about the relationship between the March Basic and the ASEC, please see our additional documentation [URL omitted from DDI].</p> |
| Concept:        | Linking Variables -- PERSON                                                                                                                                                                                                                                                                                                                                                                                                                                                                                                                                                                                                                                                                                                                                                                                                                                                                                                                                                                                                                                                                                                                                                                                                                                                                                                                                                                                                                                                                                                                                                                                                                                                                                                                                                                                                                                                                                                                                                                                                      |
| Start Position: | 59                                                                                                                                                                                                                                                                                                                                                                                                                                                                                                                                                                                                                                                                                                                                                                                                                                                                                                                                                                                                                                                                                                                                                                                                                                                                                                                                                                                                                                                                                                                                                                                                                                                                                                                                                                                                                                                                                                                                                                                                                               |
| End Position:   | 72                                                                                                                                                                                                                                                                                                                                                                                                                                                                                                                                                                                                                                                                                                                                                                                                                                                                                                                                                                                                                                                                                                                                                                                                                                                                                                                                                                                                                                                                                                                                                                                                                                                                                                                                                                                                                                                                                                                                                                                                                               |

|                         |                                        |
|-------------------------|----------------------------------------|
| Width:                  | 14                                     |
| Variable Format:        | numeric                                |
| Implied Decimal Places: | 0                                      |
| Coder Instructions:     | CPSIDP is a 14-digit numeric variable. |

### Variable: "WTSUPP"

|                |                                                                                                                                                                                                                                                                                                                                                                                                                                                                                                                                                                                                                                                                                                                                                                                                                                                                                                                                                                                                                                                                                                                                                                                                                                                                                                                                                                                                                                                                                                                                                                                                                                                                                                                                                                                                                                                                                                                                                                                                                                                                                                                                                                                                                                                                                                                                                                                                                                                                                      |
|----------------|--------------------------------------------------------------------------------------------------------------------------------------------------------------------------------------------------------------------------------------------------------------------------------------------------------------------------------------------------------------------------------------------------------------------------------------------------------------------------------------------------------------------------------------------------------------------------------------------------------------------------------------------------------------------------------------------------------------------------------------------------------------------------------------------------------------------------------------------------------------------------------------------------------------------------------------------------------------------------------------------------------------------------------------------------------------------------------------------------------------------------------------------------------------------------------------------------------------------------------------------------------------------------------------------------------------------------------------------------------------------------------------------------------------------------------------------------------------------------------------------------------------------------------------------------------------------------------------------------------------------------------------------------------------------------------------------------------------------------------------------------------------------------------------------------------------------------------------------------------------------------------------------------------------------------------------------------------------------------------------------------------------------------------------------------------------------------------------------------------------------------------------------------------------------------------------------------------------------------------------------------------------------------------------------------------------------------------------------------------------------------------------------------------------------------------------------------------------------------------------|
| Name:          | WTSUPP                                                                                                                                                                                                                                                                                                                                                                                                                                                                                                                                                                                                                                                                                                                                                                                                                                                                                                                                                                                                                                                                                                                                                                                                                                                                                                                                                                                                                                                                                                                                                                                                                                                                                                                                                                                                                                                                                                                                                                                                                                                                                                                                                                                                                                                                                                                                                                                                                                                                               |
| Label:         | Supplement Weight                                                                                                                                                                                                                                                                                                                                                                                                                                                                                                                                                                                                                                                                                                                                                                                                                                                                                                                                                                                                                                                                                                                                                                                                                                                                                                                                                                                                                                                                                                                                                                                                                                                                                                                                                                                                                                                                                                                                                                                                                                                                                                                                                                                                                                                                                                                                                                                                                                                                    |
| Variable Text: | <p>WTSUPP is a person-level weight that should be used in analyses of individual-level CPS supplement data. Since the CPS relies on a complex stratified sampling scheme, it is essential to use one of the provided weighting variables.</p> <p>Researchers should use WTFINL rather than WTSUPP when they wish to conduct person-level analyses of non-supplement data. EARNWT should be used for any analysis including a small number of person-level variables (EARNWEEK, HOURWAGE, PAIDHOUR, and UNION). Researchers should use HWTSUPP for household-level analyses.</p> <p>User Caution: For analyses that include the 2014 ASEC sample, please see the comparability tab.</p> <p>The ASEC CPS files include two groups of people who are not included in the production of published labor force statistics: (1) members of the armed services, and (2) members of the Hispanic oversample who were interviewed in months other than March. WTFINL and EARNWT assign these groups a value of 0. Both groups are assigned non-zero values in WTSUPP.</p> <p>WTSUPP is based on the inverse probability of selection into the sample and adjustments for the following factors: failure to obtain an interview; sampling within large sample units; the known distribution of the entire population according to age, sex, and race; over-sampling Hispanic persons; to give husbands and wives the same weight; and an additional step to provide consistency with labor force estimates from the basic survey.</p> <p>Estimates on the entire population are prepared by projecting forward the resident population from the last available census. These projections are derived by updating the demographic census data from a number of other data sources that account for death, births and net migration. About 3 years after every census (i.e. 2003 for the 2000 Census and 2013 for the 2010 Census), the Census Bureau updates its independent population control and provides a new weight for the relevant years.</p> <p>Two important points should be noted here. First, the lag between when the Census is conducted and when the CPS weights are updated is about 3 years. While the Census data are being processed, the CPS files are made available using the weighting scheme from the US Census prior to the latest Census. Second, once the files are updated, the old weights become obsolete and are replaced in the IPUMS data extract system.</p> |

|                         |                                                                                                                                                                                                                                                                                                                                                                                                                                                                              |
|-------------------------|------------------------------------------------------------------------------------------------------------------------------------------------------------------------------------------------------------------------------------------------------------------------------------------------------------------------------------------------------------------------------------------------------------------------------------------------------------------------------|
|                         | Published estimates from the lag years that use the old weights are not always updated. For example, 2010 poverty estimates were released in ASEC using the 2000 population controls. Once the 2010 population controls were made available, IPUMS-CPS replaced the ASEC 2010, 2011, and 2012 weights that are based on the 2000 population control with weights that are based on the 2010 population controls. IPUMS-CPS makes available only the most up-to-date weights. |
| Concept:                | Technical Variables -- PERSON                                                                                                                                                                                                                                                                                                                                                                                                                                                |
| Start Position:         | 73                                                                                                                                                                                                                                                                                                                                                                                                                                                                           |
| End Position:           | 82                                                                                                                                                                                                                                                                                                                                                                                                                                                                           |
| Width:                  | 10                                                                                                                                                                                                                                                                                                                                                                                                                                                                           |
| Variable Format:        | numeric                                                                                                                                                                                                                                                                                                                                                                                                                                                                      |
| Implied Decimal Places: | 4                                                                                                                                                                                                                                                                                                                                                                                                                                                                            |
| Coder Instructions:     | WTSUPP is a 10-digit numeric variable with four implied decimal places. That is, values of 0012345600 should be interpreted as 1,234.56. The IPUMS command files automatically divide WTSUPP by 10,000, so no further adjustment is needed.                                                                                                                                                                                                                                  |

### Variable: "EARNWT"

|                |                                                                                                                                                                                                                                                                                                                                                                                                                                                                                                                                                                                                                                                                                                                                                                                                                                                                                                                                                                                                                                                                                                                                                                                                                                                                                                                                                                           |
|----------------|---------------------------------------------------------------------------------------------------------------------------------------------------------------------------------------------------------------------------------------------------------------------------------------------------------------------------------------------------------------------------------------------------------------------------------------------------------------------------------------------------------------------------------------------------------------------------------------------------------------------------------------------------------------------------------------------------------------------------------------------------------------------------------------------------------------------------------------------------------------------------------------------------------------------------------------------------------------------------------------------------------------------------------------------------------------------------------------------------------------------------------------------------------------------------------------------------------------------------------------------------------------------------------------------------------------------------------------------------------------------------|
| Name:          | EARNWT                                                                                                                                                                                                                                                                                                                                                                                                                                                                                                                                                                                                                                                                                                                                                                                                                                                                                                                                                                                                                                                                                                                                                                                                                                                                                                                                                                    |
| Label:         | Earnings weight                                                                                                                                                                                                                                                                                                                                                                                                                                                                                                                                                                                                                                                                                                                                                                                                                                                                                                                                                                                                                                                                                                                                                                                                                                                                                                                                                           |
| Variable Text: | <p>EARNWT is a person-level weight that should be used in any analysis including one of the following variables: EARNWEEK, HOURWAGE, PAIDHOUR, UNION, UHRSWORKORG, WKSWORKORG, ELIGORG, and OTPAY. For any other analysis using ASEC data, researchers should use WTSUPP or for analyses of non-ASEC data, WTFINL.</p> <p>Individuals in the 6 rotation groups that were not asked the "earner study" questions (covering EARNWEEK, HOURWAGE, PAIDHOUR, UNION, UHRSWORKORG, WKSWORKORG, ELIGORG, and OTPAY) have a value of zero for EARNWT. Even in the 2 rotation groups where "earner study" questions were fielded, children under 15 and members of the armed forces have a value of zero for EARNWT.</p> <p>According to Technical Paper 66 [URL omitted from DDI.], issued jointly by the Census Bureau and the Bureau of Labor Statistics, individuals eligible for the earner study are civilians age 15 and older in rotation groups 4 or 8 who are not self-employed. In any given month, approximately 1/4 of the CPS sample is in the earner study and each household should appear in the earner study exactly twice. Based on documentation from Unicon and NBER [URL omitted from DDI.], and after an inspection of the original CPS data, we recommend that users impose the CPS eligibility restrictions in any analyses of earner study variables.</p> |



|                         |                                                                                                                                                                                                                           |
|-------------------------|---------------------------------------------------------------------------------------------------------------------------------------------------------------------------------------------------------------------------|
| Concept:                | Technical Variables -- PERSON                                                                                                                                                                                             |
| Start Position:         | 83                                                                                                                                                                                                                        |
| End Position:           | 92                                                                                                                                                                                                                        |
| Width:                  | 10                                                                                                                                                                                                                        |
| Variable Format:        | numeric                                                                                                                                                                                                                   |
| Implied Decimal Places: | 4                                                                                                                                                                                                                         |
| Coder Instructions:     | EARNWT is an 8-digit numeric variable with four implied decimals. That is, 12345678 should be interpreted as 1234.5678. The IPUMS command files automatically divide EARNWT by 10000, so no further adjustment is needed. |

**Variable: "NCHILD"**

|                  |                                                                                                                                                                                                                                                                                                                                                                                                                                                                                                                                       |
|------------------|---------------------------------------------------------------------------------------------------------------------------------------------------------------------------------------------------------------------------------------------------------------------------------------------------------------------------------------------------------------------------------------------------------------------------------------------------------------------------------------------------------------------------------------|
| Name:            | NCHILD                                                                                                                                                                                                                                                                                                                                                                                                                                                                                                                                |
| Label:           | Number of own children in household                                                                                                                                                                                                                                                                                                                                                                                                                                                                                                   |
| Variable Text:   | <p>NCHILD counts the number of own children (of any age or marital status) residing with each individual. NCHILD includes step-children and adopted children as well as biological children. Persons with no children present are coded 0.</p> <p>Note that NCHILD is an IPUMS-derived variable using IPUMS-derived family interrelationships. Thus NCHILD may differ from any family information that comes from just the Census family definitions. See for example FTYPE, FAMKIND, and FAMREL for more on Census family units.</p> |
| Concept:         | Family Interrelationship Variables -- PERSON                                                                                                                                                                                                                                                                                                                                                                                                                                                                                          |
| Start Position:  | 93                                                                                                                                                                                                                                                                                                                                                                                                                                                                                                                                    |
| End Position:    | 93                                                                                                                                                                                                                                                                                                                                                                                                                                                                                                                                    |
| Width:           | 1                                                                                                                                                                                                                                                                                                                                                                                                                                                                                                                                     |
| Variable Format: | numeric                                                                                                                                                                                                                                                                                                                                                                                                                                                                                                                               |
| Implied Decimal  | 0                                                                                                                                                                                                                                                                                                                                                                                                                                                                                                                                     |

Places:

**Categories**

| Value | Label              |
|-------|--------------------|
| 0     | 0 children present |
| 1     | 1 child present    |
| 2     | 2                  |
| 3     | 3                  |
| 4     | 4                  |
| 5     | 5                  |
| 6     | 6                  |
| 7     | 7                  |
| 8     | 8                  |
| 9     | 9+                 |

**Variable: "AGE"**

|                         |                                               |
|-------------------------|-----------------------------------------------|
| Name:                   | AGE                                           |
| Label:                  | Age                                           |
| Variable Text:          | Age gives each person's age at last birthday. |
| Concept:                | Core Demographic Variables -- PERSON          |
| Start Position:         | 94                                            |
| End Position:           | 95                                            |
| Width:                  | 2                                             |
| Variable Format:        | numeric                                       |
| Implied Decimal Places: | 0                                             |

**Categories**

| <b>Value</b> | <b>Label</b> |
|--------------|--------------|
| 00           | Under 1 year |
| 01           | 1            |
| 02           | 2            |
| 03           | 3            |
| 04           | 4            |
| 05           | 5            |
| 06           | 6            |
| 07           | 7            |
| 08           | 8            |
| 09           | 9            |
| 10           | 10           |
| 11           | 11           |
| 12           | 12           |
| 13           | 13           |
| 14           | 14           |
| 15           | 15           |
| 16           | 16           |
| 17           | 17           |
| 18           | 18           |
| 19           | 19           |
| 20           | 20           |

|    |    |
|----|----|
| 21 | 21 |
| 22 | 22 |
| 23 | 23 |
| 24 | 24 |
| 25 | 25 |
| 26 | 26 |
| 27 | 27 |
| 28 | 28 |
| 29 | 29 |
| 30 | 30 |
| 31 | 31 |
| 32 | 32 |
| 33 | 33 |
| 34 | 34 |
| 35 | 35 |
| 36 | 36 |
| 37 | 37 |
| 38 | 38 |
| 39 | 39 |
| 40 | 40 |
| 41 | 41 |
| 42 | 42 |
| 43 | 43 |
| 44 | 44 |

|    |    |
|----|----|
| 45 | 45 |
| 46 | 46 |
| 47 | 47 |
| 48 | 48 |
| 49 | 49 |
| 50 | 50 |
| 51 | 51 |
| 52 | 52 |
| 53 | 53 |
| 54 | 54 |
| 55 | 55 |
| 56 | 56 |
| 57 | 57 |
| 58 | 58 |
| 59 | 59 |
| 60 | 60 |
| 61 | 61 |
| 62 | 62 |
| 63 | 63 |
| 64 | 64 |
| 65 | 65 |
| 66 | 66 |
| 67 | 67 |
| 68 | 68 |

|    |                     |
|----|---------------------|
| 69 | 69                  |
| 70 | 70                  |
| 71 | 71                  |
| 72 | 72                  |
| 73 | 73                  |
| 74 | 74                  |
| 75 | 75                  |
| 76 | 76                  |
| 77 | 77                  |
| 78 | 78                  |
| 79 | 79                  |
| 80 | 80                  |
| 81 | 81                  |
| 82 | 82                  |
| 83 | 83                  |
| 84 | 84                  |
| 85 | 85                  |
| 86 | 86                  |
| 87 | 87                  |
| 88 | 88                  |
| 89 | 89                  |
| 90 | 90 (90+, 1988-2002) |
| 91 | 91                  |
| 92 | 92                  |

|    |     |
|----|-----|
| 93 | 93  |
| 94 | 94  |
| 95 | 95  |
| 96 | 96  |
| 97 | 97  |
| 98 | 98  |
| 99 | 99+ |

**Variable: "SEX"**

|                         |                                      |
|-------------------------|--------------------------------------|
| Name:                   | SEX                                  |
| Label:                  | Sex                                  |
| Variable Text:          | SEX gives each person's sex.         |
| Concept:                | Core Demographic Variables -- PERSON |
| Start Position:         | 96                                   |
| End Position:           | 96                                   |
| Width:                  | 1                                    |
| Variable Format:        | numeric                              |
| Implied Decimal Places: | 0                                    |

**Categories**

| Value | Label  |
|-------|--------|
| 1     | Male   |
| 2     | Female |
| 9     | NIU    |

**Variable: "RACE"**

|                         |                                                                                                                                                                                                                                                                                                                                                                                                                   |
|-------------------------|-------------------------------------------------------------------------------------------------------------------------------------------------------------------------------------------------------------------------------------------------------------------------------------------------------------------------------------------------------------------------------------------------------------------|
| Name:                   | RACE                                                                                                                                                                                                                                                                                                                                                                                                              |
| Label:                  | Race                                                                                                                                                                                                                                                                                                                                                                                                              |
| Variable Text:          | Racial categories in the CPS have been more consistent than racial categories in the census. Up through 2002, the number of race categories ranged from 3 (white, negro, and other) to 5 (white, black, American Indian/Eskimo/Aleut, Asian or Pacific Islander, and other). Beginning in 2003, respondents could report more than one race, and the number of codes rose to 21, and then up to 26 codes in 2013. |
| Concept:                | Core Demographic Variables -- PERSON                                                                                                                                                                                                                                                                                                                                                                              |
| Start Position:         | 97                                                                                                                                                                                                                                                                                                                                                                                                                |
| End Position:           | 99                                                                                                                                                                                                                                                                                                                                                                                                                |
| Width:                  | 3                                                                                                                                                                                                                                                                                                                                                                                                                 |
| Variable Format:        | numeric                                                                                                                                                                                                                                                                                                                                                                                                           |
| Implied Decimal Places: | 0                                                                                                                                                                                                                                                                                                                                                                                                                 |

**Categories**

| Value | Label                          |
|-------|--------------------------------|
| 100   | White                          |
| 200   | Black/Negro                    |
| 300   | American Indian/Aleut/Eskimo   |
| 650   | Asian or Pacific Islander      |
| 651   | Asian only                     |
| 652   | Hawaiian/Pacific Islander only |
| 700   | Other (single) race, n.e.c.    |
| 801   | White-Black                    |



|     |                                                       |
|-----|-------------------------------------------------------|
| 802 | White-American Indian                                 |
| 803 | White-Asian                                           |
| 804 | White-Hawaiian/Pacific Islander                       |
| 805 | Black-American Indian                                 |
| 806 | Black-Asian                                           |
| 807 | Black-Hawaiian/Pacific Islander                       |
| 808 | American Indian-Asian                                 |
| 809 | Asian-Hawaiian/Pacific Islander                       |
| 810 | White-Black-American Indian                           |
| 811 | White-Black-Asian                                     |
| 812 | White-American Indian-Asian                           |
| 813 | White-Asian-Hawaiian/Pacific Islander                 |
| 814 | White-Black-American Indian-Asian                     |
| 815 | American Indian-Hawaiian/Pacific Islander             |
| 816 | White-Black--Hawaiian/Pacific Islander                |
| 817 | White-American Indian-Hawaiian/Pacific Islander       |
| 818 | Black-American Indian-Asian                           |
| 819 | White-American Indian-Asian-Hawaiian/Pacific Islander |
| 820 | Two or three races, unspecified                       |
| 830 | Four or five races, unspecified                       |
| 999 | Blank                                                 |

**Variable: "MARST"**

|       |       |
|-------|-------|
| Name: | MARST |
|-------|-------|

|                         |                                                                                                                            |
|-------------------------|----------------------------------------------------------------------------------------------------------------------------|
| Label:                  | Marital status                                                                                                             |
| Variable Text:          | MARST gives each person's current marital status, including whether the spouse was currently living in the same household. |
| Concept:                | Core Demographic Variables -- PERSON                                                                                       |
| Start Position:         | 100                                                                                                                        |
| End Position:           | 100                                                                                                                        |
| Width:                  | 1                                                                                                                          |
| Variable Format:        | numeric                                                                                                                    |
| Implied Decimal Places: | 0                                                                                                                          |

### Categories

| Value | Label                   |
|-------|-------------------------|
| 1     | Married, spouse present |
| 2     | Married, spouse absent  |
| 3     | Separated               |
| 4     | Divorced                |
| 5     | Widowed                 |
| 6     | Never married/single    |
| 7     | Widowed or Divorced     |
| 9     | NIU                     |

### Variable: "POPSTAT"

|          |                                                                                         |
|----------|-----------------------------------------------------------------------------------------|
| Name:    | POPSTAT                                                                                 |
| Label:   | Adult civilian, armed forces, or child                                                  |
| Variable | POPSTAT reports the person's status in the population -- whether the person is an adult |

| Text:                                                                                                                                                                                                                                 | <p>civilian, member of the U. S. armed forces, or a child.</p> <p>The CPS is, in large part, a labor market survey, and is used to measure unemployment among the civilian labor force. (The U.S. unemployment rate reported by the Bureau of Labor Statistics excludes members of the armed forces.) Children (for ASEC samples under age 14 through 1979 and under age 15 beginning in 1980; for non-ASEC samples under 14 through February, 1989 and under 15 beginning March 1989) were not asked questions pertaining to economic activity. Members of the armed forces were asked only a small number of questions relating to demographic facts, migration, and income during the previous calendar year. POPSTAT provides a useful "filter" variable for excluding persons who had no responses for many of the survey questions. If children and/or members of the armed forces were excluded from the universe of a particular question, they appear only in the "not in universe" category of a variable.</p> |       |       |   |                |   |              |   |       |
|---------------------------------------------------------------------------------------------------------------------------------------------------------------------------------------------------------------------------------------|--------------------------------------------------------------------------------------------------------------------------------------------------------------------------------------------------------------------------------------------------------------------------------------------------------------------------------------------------------------------------------------------------------------------------------------------------------------------------------------------------------------------------------------------------------------------------------------------------------------------------------------------------------------------------------------------------------------------------------------------------------------------------------------------------------------------------------------------------------------------------------------------------------------------------------------------------------------------------------------------------------------------------|-------|-------|---|----------------|---|--------------|---|-------|
| Concept:                                                                                                                                                                                                                              | Core Demographic Variables -- PERSON                                                                                                                                                                                                                                                                                                                                                                                                                                                                                                                                                                                                                                                                                                                                                                                                                                                                                                                                                                                     |       |       |   |                |   |              |   |       |
| Start Position:                                                                                                                                                                                                                       | 101                                                                                                                                                                                                                                                                                                                                                                                                                                                                                                                                                                                                                                                                                                                                                                                                                                                                                                                                                                                                                      |       |       |   |                |   |              |   |       |
| End Position:                                                                                                                                                                                                                         | 101                                                                                                                                                                                                                                                                                                                                                                                                                                                                                                                                                                                                                                                                                                                                                                                                                                                                                                                                                                                                                      |       |       |   |                |   |              |   |       |
| Width:                                                                                                                                                                                                                                | 1                                                                                                                                                                                                                                                                                                                                                                                                                                                                                                                                                                                                                                                                                                                                                                                                                                                                                                                                                                                                                        |       |       |   |                |   |              |   |       |
| Variable Format:                                                                                                                                                                                                                      | numeric                                                                                                                                                                                                                                                                                                                                                                                                                                                                                                                                                                                                                                                                                                                                                                                                                                                                                                                                                                                                                  |       |       |   |                |   |              |   |       |
| Implied Decimal Places:                                                                                                                                                                                                               | 0                                                                                                                                                                                                                                                                                                                                                                                                                                                                                                                                                                                                                                                                                                                                                                                                                                                                                                                                                                                                                        |       |       |   |                |   |              |   |       |
| <b>Categories</b>                                                                                                                                                                                                                     |                                                                                                                                                                                                                                                                                                                                                                                                                                                                                                                                                                                                                                                                                                                                                                                                                                                                                                                                                                                                                          |       |       |   |                |   |              |   |       |
| <table border="1"> <thead> <tr> <th>Value</th> <th>Label</th> </tr> </thead> <tbody> <tr> <td>1</td> <td>Adult civilian</td> </tr> <tr> <td>2</td> <td>Armed Forces</td> </tr> <tr> <td>3</td> <td>Child</td> </tr> </tbody> </table> |                                                                                                                                                                                                                                                                                                                                                                                                                                                                                                                                                                                                                                                                                                                                                                                                                                                                                                                                                                                                                          | Value | Label | 1 | Adult civilian | 2 | Armed Forces | 3 | Child |
| Value                                                                                                                                                                                                                                 | Label                                                                                                                                                                                                                                                                                                                                                                                                                                                                                                                                                                                                                                                                                                                                                                                                                                                                                                                                                                                                                    |       |       |   |                |   |              |   |       |
| 1                                                                                                                                                                                                                                     | Adult civilian                                                                                                                                                                                                                                                                                                                                                                                                                                                                                                                                                                                                                                                                                                                                                                                                                                                                                                                                                                                                           |       |       |   |                |   |              |   |       |
| 2                                                                                                                                                                                                                                     | Armed Forces                                                                                                                                                                                                                                                                                                                                                                                                                                                                                                                                                                                                                                                                                                                                                                                                                                                                                                                                                                                                             |       |       |   |                |   |              |   |       |
| 3                                                                                                                                                                                                                                     | Child                                                                                                                                                                                                                                                                                                                                                                                                                                                                                                                                                                                                                                                                                                                                                                                                                                                                                                                                                                                                                    |       |       |   |                |   |              |   |       |

**Variable: "BPL"**

|                |                                                                                                                     |
|----------------|---------------------------------------------------------------------------------------------------------------------|
| Name:          | BPL                                                                                                                 |
| Label:         | Birthplace                                                                                                          |
| Variable Text: | BPL indicates whether persons were born in the United States and, if not, the foreign country where they were born. |

|                         |                                        |
|-------------------------|----------------------------------------|
| Concept:                | Ethnicity/Nativity Variables -- PERSON |
| Start Position:         | 102                                    |
| End Position:           | 106                                    |
| Width:                  | 5                                      |
| Variable Format:        | numeric                                |
| Implied Decimal Places: | 0                                      |

### Categories

| Value | Label                     |
|-------|---------------------------|
| 09900 | United States, n.s.       |
| 10000 | American Samoa            |
| 10500 | Guam                      |
| 10750 | Northern Mariana Islands  |
| 11000 | Puerto Rico               |
| 11500 | U.S. Virgin Islands       |
| 12090 | U.S. outlying areas, n.s. |
| 15000 | Canada                    |
| 16010 | Bermuda                   |
| 19900 | North America, n.s.       |
| 20000 | Mexico                    |
| 21010 | Belize/British Honduras   |
| 21020 | Costa Rica                |
| 21030 | El Salvador               |
| 21040 | Guatemala                 |

|       |                             |
|-------|-----------------------------|
| 21050 | Honduras                    |
| 21060 | Nicaragua                   |
| 21070 | Panama                      |
| 21090 | Central America, n.s.       |
| 25000 | Cuba                        |
| 26010 | Dominican Republic          |
| 26020 | Haiti                       |
| 26030 | Jamaica                     |
| 26043 | Bahamas                     |
| 26044 | Barbados                    |
| 26054 | Dominica                    |
| 26055 | Grenada                     |
| 26060 | Trinidad and Tobago         |
| 26065 | Antigua and Barbuda         |
| 26070 | St. Kitts--Nevis            |
| 26075 | St. Lucia                   |
| 26080 | St. Vincent and the Grenadi |
| 26091 | Caribbean, n.s.             |
| 30005 | Argentina                   |
| 30010 | Bolivia                     |
| 30015 | Brazil                      |
| 30020 | Chile                       |
| 30025 | Colombia                    |
| 30030 | Ecuador                     |

|       |                       |
|-------|-----------------------|
| 30040 | Guyana/British Guiana |
| 30050 | Peru                  |
| 30060 | Uruguay               |
| 30065 | Venezuela             |
| 30070 | Paraguay              |
| 30090 | South America, n.s.   |
| 31000 | Americas, n.s.        |
| 40000 | Denmark               |
| 40100 | Finland               |
| 40200 | Iceland               |
| 40400 | Norway                |
| 40500 | Sweden                |
| 41000 | England               |
| 41100 | Scotland              |
| 41200 | Wales                 |
| 41300 | United Kingdom, n.s.  |
| 41400 | Ireland               |
| 41410 | Northern Ireland      |
| 42000 | Belgium               |
| 42100 | France                |
| 42500 | Netherlands           |
| 42600 | Switzerland           |
| 43300 | Greece                |
| 43400 | Italy                 |

|       |                        |
|-------|------------------------|
| 43600 | Portugal               |
| 43610 | Azores                 |
| 43800 | Spain                  |
| 45000 | Austria                |
| 45200 | Czechoslovakia         |
| 45212 | Slovakia               |
| 45213 | Czech Republic         |
| 45300 | Germany                |
| 45400 | Hungary                |
| 45500 | Poland                 |
| 45600 | Romania                |
| 45650 | Bulgaria               |
| 45675 | Albania                |
| 45700 | Yugoslavia             |
| 45720 | Bosnia and Herzegovina |
| 45730 | Croatia                |
| 45740 | Macedonia              |
| 45750 | Serbia                 |
| 45760 | Kosovo                 |
| 45770 | Montenegro             |
| 46100 | Estonia                |
| 46200 | Latvia                 |
| 46300 | Lithuania              |
| 46500 | Other USSR/Russia      |

|       |              |
|-------|--------------|
| 46530 | Ukraine      |
| 46535 | Belarus      |
| 46540 | Moldova      |
| 46590 | USSR, n.s.   |
| 49900 | Europe, n.s. |
| 50000 | China        |
| 50010 | Hong Kong    |
| 50040 | Taiwan       |
| 50100 | Japan        |
| 50200 | Korea        |
| 50220 | South Korea  |
| 50300 | Mongolia     |
| 51100 | Cambodia     |
| 51200 | Indonesia    |
| 51300 | Laos         |
| 51400 | Malaysia     |
| 51500 | Philippines  |
| 51600 | Singapore    |
| 51700 | Thailand     |
| 51800 | Vietnam      |
| 52000 | Afghanistan  |
| 52100 | India        |
| 52110 | Bangladesh   |
| 52120 | Bhutan       |



|       |                      |
|-------|----------------------|
| 52130 | Burma                |
| 52140 | Pakistan             |
| 52150 | Sri Lanka            |
| 52200 | Nepal                |
| 55100 | Armenia              |
| 55200 | Azerbaijan           |
| 55300 | Georgia              |
| 55400 | Uzbekistan           |
| 55500 | Kazakhstan           |
| 53000 | Iran                 |
| 53200 | Iraq                 |
| 53400 | Israel               |
| 53420 | Palestine            |
| 53500 | Jordan               |
| 53700 | Lebanon              |
| 54000 | Saudi Arabia         |
| 54100 | Syria                |
| 54200 | Turkey               |
| 54300 | Cyprus               |
| 54350 | Kuwait               |
| 54400 | Yemen                |
| 54500 | United Arab Emirates |
| 54700 | Middle East, n.s.    |
| 59900 | Asia, n.e.c./n.s.    |

|       |                         |
|-------|-------------------------|
| 60010 | Northern Africa         |
| 60012 | Egypt/United Arab Rep.  |
| 60014 | Morocco                 |
| 60016 | Algeria                 |
| 60018 | Sudan                   |
| 60019 | Libya                   |
| 60023 | Ghana                   |
| 60031 | Nigeria                 |
| 60032 | Cameroon                |
| 60033 | Cape Verde              |
| 60034 | Liberia                 |
| 60035 | Senegal                 |
| 60036 | Sierra Leone            |
| 60037 | Guinea                  |
| 60038 | Ivory Coast             |
| 60039 | Togo                    |
| 60040 | Eritrea                 |
| 60044 | Ethiopia                |
| 60045 | Kenya                   |
| 60050 | Somalia                 |
| 60060 | Tanzania                |
| 60065 | Uganda                  |
| 60070 | Zimbabwe                |
| 60094 | South Africa (Union of) |

|       |                           |
|-------|---------------------------|
| 60095 | Zaire                     |
| 60096 | Congo                     |
| 60097 | Zambia                    |
| 60099 | Africa, n.s./n.e.c.       |
| 70010 | Australia                 |
| 70020 | New Zealand               |
| 71000 | Pacific Islands           |
| 71021 | Fiji                      |
| 71022 | Tonga                     |
| 71023 | Samoa                     |
| 71024 | Marshall Islands          |
| 72000 | Micronesia                |
| 96000 | Other, n.e.c. and unknown |
| 99999 | NIU                       |

**Variable: "YRIMMIG"**

|                  |                                                                                                       |
|------------------|-------------------------------------------------------------------------------------------------------|
| Name:            | YRIMMIG                                                                                               |
| Label:           | Year of immigration                                                                                   |
| Variable Text:   | YRIMMIG reports the year in which a person born outside the United States "came to the U.S. to stay." |
| Concept:         | Ethnicity/Nativity Variables -- PERSON                                                                |
| Start Position:  | 107                                                                                                   |
| End Position:    | 110                                                                                                   |
| Width:           | 4                                                                                                     |
| Variable Format: | numeric                                                                                               |

Implied Decimal  
Places:

0

**Categories**

| <b>Value</b> | <b>Label</b>                    |
|--------------|---------------------------------|
| 0000         | NIU                             |
| 1949         | 1949 or earlier                 |
| 1959         | 1950-1959                       |
| 1964         | 1960-1964                       |
| 1969         | 1965-1969                       |
| 1974         | 1970-1974                       |
| 1979         | 1975-1979                       |
| 1981         | 1980-1981                       |
| 1983         | 1982-1983                       |
| 1985         | 1984-1985                       |
| 1987         | 1986-1987                       |
| 1989         | 1988-1989                       |
| 1991         | 1990-1991                       |
| 1993         | 1992-1993                       |
| 1994         | 1992-1994                       |
| 1995         | 1994-1995                       |
| 1996         | 1994-1996                       |
| 1997         | 1996-1997                       |
| 1998         | 1996-1998 (2000 CPS: 1998)      |
| 1999         | 1998-1999 (1999 CPS: 1996-1999) |

|      |                                      |
|------|--------------------------------------|
| 2000 | 1998-2000                            |
| 2001 | 2000-2001 (2001 CPS: 1998-2001)      |
| 2002 | 2000-2002                            |
| 2003 | 2002-2003 (2003 CPS: 2000-2003)      |
| 2004 | 2002-2004                            |
| 2005 | 2004-2005 (2005 CPS: 2002-2005)      |
| 2006 | 2004-2006                            |
| 2007 | 2004-2007                            |
| 2008 | 2006-2008 (2006-2007 CPS: 2004-2008) |
| 2009 | 2006-2009                            |
| 2010 | 2008-2010 (2012 CPS: 2008-2009)      |
| 2011 | 2008-2011                            |
| 2012 | 2010-2012 (2014 CPS: 2010-2011)      |
| 2013 | 2010-2013                            |
| 2014 | 2012-2014                            |
| 2015 | 2012-2015                            |
| 2016 | 2014-2016                            |

### Variable: "CITIZEN"

|                |                                                                                                                                                                                                                                                                                                                                                            |
|----------------|------------------------------------------------------------------------------------------------------------------------------------------------------------------------------------------------------------------------------------------------------------------------------------------------------------------------------------------------------------|
| Name:          | CITIZEN                                                                                                                                                                                                                                                                                                                                                    |
| Label:         | Citizenship status                                                                                                                                                                                                                                                                                                                                         |
| Variable Text: | CITIZEN reports the citizenship status of foreign-born persons. In IPUMS-CPS, people born in the U.S., Puerto Rico, or U.S. outlying areas were excluded from the question universe. Respondents were identified as belonging to one of three groups: citizens by virtue of being born abroad to American parents; naturalized citizens; and non-citizens. |
| Concept:       | Ethnicity/Nativity Variables -- PERSON                                                                                                                                                                                                                                                                                                                     |

| Start Position:                                                                                                                                                                                                                                                                                                                             | 111                             |       |       |   |     |   |                                 |   |                     |   |               |   |     |
|---------------------------------------------------------------------------------------------------------------------------------------------------------------------------------------------------------------------------------------------------------------------------------------------------------------------------------------------|---------------------------------|-------|-------|---|-----|---|---------------------------------|---|---------------------|---|---------------|---|-----|
| End Position:                                                                                                                                                                                                                                                                                                                               | 111                             |       |       |   |     |   |                                 |   |                     |   |               |   |     |
| Width:                                                                                                                                                                                                                                                                                                                                      | 1                               |       |       |   |     |   |                                 |   |                     |   |               |   |     |
| Variable Format:                                                                                                                                                                                                                                                                                                                            | numeric                         |       |       |   |     |   |                                 |   |                     |   |               |   |     |
| Implied Decimal Places:                                                                                                                                                                                                                                                                                                                     | 0                               |       |       |   |     |   |                                 |   |                     |   |               |   |     |
| <b>Categories</b>                                                                                                                                                                                                                                                                                                                           |                                 |       |       |   |     |   |                                 |   |                     |   |               |   |     |
| <table border="1"> <thead> <tr> <th>Value</th> <th>Label</th> </tr> </thead> <tbody> <tr> <td>0</td> <td>NIU</td> </tr> <tr> <td>1</td> <td>Born abroad of American parents</td> </tr> <tr> <td>2</td> <td>Naturalized citizen</td> </tr> <tr> <td>3</td> <td>Not a citizen</td> </tr> <tr> <td>9</td> <td>NIU</td> </tr> </tbody> </table> |                                 | Value | Label | 0 | NIU | 1 | Born abroad of American parents | 2 | Naturalized citizen | 3 | Not a citizen | 9 | NIU |
| Value                                                                                                                                                                                                                                                                                                                                       | Label                           |       |       |   |     |   |                                 |   |                     |   |               |   |     |
| 0                                                                                                                                                                                                                                                                                                                                           | NIU                             |       |       |   |     |   |                                 |   |                     |   |               |   |     |
| 1                                                                                                                                                                                                                                                                                                                                           | Born abroad of American parents |       |       |   |     |   |                                 |   |                     |   |               |   |     |
| 2                                                                                                                                                                                                                                                                                                                                           | Naturalized citizen             |       |       |   |     |   |                                 |   |                     |   |               |   |     |
| 3                                                                                                                                                                                                                                                                                                                                           | Not a citizen                   |       |       |   |     |   |                                 |   |                     |   |               |   |     |
| 9                                                                                                                                                                                                                                                                                                                                           | NIU                             |       |       |   |     |   |                                 |   |                     |   |               |   |     |

**Variable: "NATIVITY"**

|                 |                                                                                                                                                                                                                                                                                                                                                                                                                                                                                                                                                                                        |
|-----------------|----------------------------------------------------------------------------------------------------------------------------------------------------------------------------------------------------------------------------------------------------------------------------------------------------------------------------------------------------------------------------------------------------------------------------------------------------------------------------------------------------------------------------------------------------------------------------------------|
| Name:           | NATIVITY                                                                                                                                                                                                                                                                                                                                                                                                                                                                                                                                                                               |
| Label:          | Foreign birthplace or parentage                                                                                                                                                                                                                                                                                                                                                                                                                                                                                                                                                        |
| Variable Text:  | NATIVITY classifies each person as native-born or foreign-born (i.e., whether a first-generation immigrant) and further specifies whether the parents of a native-born person were native-born or foreign-born (i.e., whether a second-generation immigrant). NATIVITY is constructed from information in the BPL, FBPL, and MBPL variables, which respectively report the place of birth of the respondent and his or her father and mother. Persons born in outlying U.S. territories and possessions and those born abroad to U.S. parents are treated as foreign-born in NATIVITY. |
| Concept:        | Ethnicity/Nativity Variables -- PERSON                                                                                                                                                                                                                                                                                                                                                                                                                                                                                                                                                 |
| Start Position: | 112                                                                                                                                                                                                                                                                                                                                                                                                                                                                                                                                                                                    |

| End Position:                                                                                                                                                                                                                                                                                                                                                                                                                   | 112                           |       |       |   |         |   |                          |   |                               |   |                               |   |                      |   |              |
|---------------------------------------------------------------------------------------------------------------------------------------------------------------------------------------------------------------------------------------------------------------------------------------------------------------------------------------------------------------------------------------------------------------------------------|-------------------------------|-------|-------|---|---------|---|--------------------------|---|-------------------------------|---|-------------------------------|---|----------------------|---|--------------|
| Width:                                                                                                                                                                                                                                                                                                                                                                                                                          | 1                             |       |       |   |         |   |                          |   |                               |   |                               |   |                      |   |              |
| Variable Format:                                                                                                                                                                                                                                                                                                                                                                                                                | numeric                       |       |       |   |         |   |                          |   |                               |   |                               |   |                      |   |              |
| Implied Decimal Places:                                                                                                                                                                                                                                                                                                                                                                                                         | 0                             |       |       |   |         |   |                          |   |                               |   |                               |   |                      |   |              |
| <b>Categories</b>                                                                                                                                                                                                                                                                                                                                                                                                               |                               |       |       |   |         |   |                          |   |                               |   |                               |   |                      |   |              |
| <table border="1"> <thead> <tr> <th>Value</th> <th>Label</th> </tr> </thead> <tbody> <tr> <td>0</td> <td>Unknown</td> </tr> <tr> <td>1</td> <td>Both parents native-born</td> </tr> <tr> <td>2</td> <td>Father foreign, mother native</td> </tr> <tr> <td>3</td> <td>Mother foreign, father native</td> </tr> <tr> <td>4</td> <td>Both parents foreign</td> </tr> <tr> <td>5</td> <td>Foreign born</td> </tr> </tbody> </table> |                               | Value | Label | 0 | Unknown | 1 | Both parents native-born | 2 | Father foreign, mother native | 3 | Mother foreign, father native | 4 | Both parents foreign | 5 | Foreign born |
| Value                                                                                                                                                                                                                                                                                                                                                                                                                           | Label                         |       |       |   |         |   |                          |   |                               |   |                               |   |                      |   |              |
| 0                                                                                                                                                                                                                                                                                                                                                                                                                               | Unknown                       |       |       |   |         |   |                          |   |                               |   |                               |   |                      |   |              |
| 1                                                                                                                                                                                                                                                                                                                                                                                                                               | Both parents native-born      |       |       |   |         |   |                          |   |                               |   |                               |   |                      |   |              |
| 2                                                                                                                                                                                                                                                                                                                                                                                                                               | Father foreign, mother native |       |       |   |         |   |                          |   |                               |   |                               |   |                      |   |              |
| 3                                                                                                                                                                                                                                                                                                                                                                                                                               | Mother foreign, father native |       |       |   |         |   |                          |   |                               |   |                               |   |                      |   |              |
| 4                                                                                                                                                                                                                                                                                                                                                                                                                               | Both parents foreign          |       |       |   |         |   |                          |   |                               |   |                               |   |                      |   |              |
| 5                                                                                                                                                                                                                                                                                                                                                                                                                               | Foreign born                  |       |       |   |         |   |                          |   |                               |   |                               |   |                      |   |              |

**Variable: "HISPAN"**

|                |                                                                                                                                                                                                                                                                                                                                                                                                                                                                                                                                                                                                                                                                                                                                                                                                                                                                                                                                                                                                                                                                        |
|----------------|------------------------------------------------------------------------------------------------------------------------------------------------------------------------------------------------------------------------------------------------------------------------------------------------------------------------------------------------------------------------------------------------------------------------------------------------------------------------------------------------------------------------------------------------------------------------------------------------------------------------------------------------------------------------------------------------------------------------------------------------------------------------------------------------------------------------------------------------------------------------------------------------------------------------------------------------------------------------------------------------------------------------------------------------------------------------|
| Name:          | HISPAN                                                                                                                                                                                                                                                                                                                                                                                                                                                                                                                                                                                                                                                                                                                                                                                                                                                                                                                                                                                                                                                                 |
| Label:         | Hispanic origin                                                                                                                                                                                                                                                                                                                                                                                                                                                                                                                                                                                                                                                                                                                                                                                                                                                                                                                                                                                                                                                        |
| Variable Text: | <p>HISPAN identifies and classifies persons of Hispanic/Spanish/Latino origin. Origin is ancestry, lineage, heritage, national group, or country of birth.</p> <p>Prior to 2003, information was collected by asking, "What is the origin or descent of each person in this household?" and asking the respondent to select the appropriate category from a limited number of choices on a flashcard (including "another group not listed.") The choices included five to eight choices that would be classified as Hispanic, "Negro" and "Black," and a small number of European ancestry groups such as "German."</p> <p>The primary intention of the question was to identify Hispanic respondents, rather than origin or descent for the general population. Beginning in 1976, the original CPS data preserved detail for only the Hispanic responses, with all others answers lumped together as "another group not listed" (relabelled "Not Hispanic" in IPUMS-CPS).</p> <p>In 2003 and later years, respondents were asked, "Are you Spanish, Hispanic, or</p> |

|                         |                                                                                                                                                                                        |
|-------------------------|----------------------------------------------------------------------------------------------------------------------------------------------------------------------------------------|
|                         | Latino?" rather than the broad query about origin or descent. Detailed information about Hispanic ethnicity was collected only from those who answered "yes" to this initial question. |
| Concept:                | Ethnicity/Nativity Variables -- PERSON                                                                                                                                                 |
| Start Position:         | 113                                                                                                                                                                                    |
| End Position:           | 115                                                                                                                                                                                    |
| Width:                  | 3                                                                                                                                                                                      |
| Variable Format:        | numeric                                                                                                                                                                                |
| Implied Decimal Places: | 0                                                                                                                                                                                      |

### Categories

| Value | Label              |
|-------|--------------------|
| 000   | Not Hispanic       |
| 100   | Mexican            |
| 102   | Mexican American   |
| 103   | Mexicano/Mexicana  |
| 104   | Chicano/Chicana    |
| 108   | Mexican (Mexicano) |
| 109   | Mexicano/Chicano   |
| 200   | Puerto Rican       |
| 300   | Cuban              |
| 400   | Dominican          |
| 500   | Salvadoran         |



|     |                                          |
|-----|------------------------------------------|
| 401 | Other Hispanic                           |
| 410 | Central/South American                   |
| 411 | Central American, (excluding Salvadoran) |
| 412 | South American                           |
| 901 | Do not know                              |
| 902 | N/A (and no response 1985-87)            |

**Variable: "EDUC"**

|                         |                                                                                                                                                                                                                                                                                                                                                                                                                                                                                                                                                                                                                                                                                                                                                                                                                                                                                                        |
|-------------------------|--------------------------------------------------------------------------------------------------------------------------------------------------------------------------------------------------------------------------------------------------------------------------------------------------------------------------------------------------------------------------------------------------------------------------------------------------------------------------------------------------------------------------------------------------------------------------------------------------------------------------------------------------------------------------------------------------------------------------------------------------------------------------------------------------------------------------------------------------------------------------------------------------------|
| Name:                   | EDUC                                                                                                                                                                                                                                                                                                                                                                                                                                                                                                                                                                                                                                                                                                                                                                                                                                                                                                   |
| Label:                  | Educational attainment recode                                                                                                                                                                                                                                                                                                                                                                                                                                                                                                                                                                                                                                                                                                                                                                                                                                                                          |
| Variable Text:          | <p>EDUC indicates respondents' educational attainment, as measured by the highest year of school or degree completed. Note that completion differs from the highest year of school attendance; for example, respondents who attended 10th grade but did not finish were classified in EDUC as having completed 9th grade.</p> <p>EDUC is a combination of two other variables, HIGRADE and EDUC99, which measure educational attainment in different ways. HIGRADE is available for years prior to 1992 and gives the respondent's highest grade of school or year of college completed. EDUC99 is available beginning in 1992 and classifies high school graduates according to their highest degree or diploma attained.</p> <p>General and detailed codes are not yet available for IPUMS-CPS, but one can construct the general version of EDUC by reading only the first two columns of EDUC.</p> |
| Concept:                | Education Variables -- PERSON                                                                                                                                                                                                                                                                                                                                                                                                                                                                                                                                                                                                                                                                                                                                                                                                                                                                          |
| Start Position:         | 116                                                                                                                                                                                                                                                                                                                                                                                                                                                                                                                                                                                                                                                                                                                                                                                                                                                                                                    |
| End Position:           | 118                                                                                                                                                                                                                                                                                                                                                                                                                                                                                                                                                                                                                                                                                                                                                                                                                                                                                                    |
| Width:                  | 3                                                                                                                                                                                                                                                                                                                                                                                                                                                                                                                                                                                                                                                                                                                                                                                                                                                                                                      |
| Variable Format:        | numeric                                                                                                                                                                                                                                                                                                                                                                                                                                                                                                                                                                                                                                                                                                                                                                                                                                                                                                |
| Implied Decimal Places: | 0                                                                                                                                                                                                                                                                                                                                                                                                                                                                                                                                                                                                                                                                                                                                                                                                                                                                                                      |

**Categories**

| <b>Value</b> | <b>Label</b>                      |
|--------------|-----------------------------------|
| 000          | NIU or no schooling               |
| 001          | NIU or blank                      |
| 002          | None or preschool                 |
| 010          | Grades 1, 2, 3, or 4              |
| 011          | Grade 1                           |
| 012          | Grade 2                           |
| 013          | Grade 3                           |
| 014          | Grade 4                           |
| 020          | Grades 5 or 6                     |
| 021          | Grade 5                           |
| 022          | Grade 6                           |
| 030          | Grades 7 or 8                     |
| 031          | Grade 7                           |
| 032          | Grade 8                           |
| 040          | Grade 9                           |
| 050          | Grade 10                          |
| 060          | Grade 11                          |
| 070          | Grade 12                          |
| 071          | 12th grade, no diploma            |
| 072          | 12th grade, diploma unclear       |
| 073          | High school diploma or equivalent |

|     |                                                     |
|-----|-----------------------------------------------------|
| 080 | 1 year of college                                   |
| 081 | Some college but no degree                          |
| 090 | 2 years of college                                  |
| 091 | Associate's degree, occupational/vocational program |
| 092 | Associate's degree, academic program                |
| 100 | 3 years of college                                  |
| 110 | 4 years of college                                  |
| 111 | Bachelor's degree                                   |
| 120 | 5+ years of college                                 |
| 121 | 5 years of college                                  |
| 122 | 6+ years of college                                 |
| 123 | Master's degree                                     |
| 124 | Professional school degree                          |
| 125 | Doctorate degree                                    |
| 999 | Missing/Unknown                                     |

**Variable: "EDUC99"**

|                 |                                                                                                                                                                                                                                                                                         |
|-----------------|-----------------------------------------------------------------------------------------------------------------------------------------------------------------------------------------------------------------------------------------------------------------------------------------|
| Name:           | EDUC99                                                                                                                                                                                                                                                                                  |
| Label:          | Educational attainment, 1990                                                                                                                                                                                                                                                            |
| Variable Text:  | EDUC99 reports the respondent's highest level of educational attainment. Respondents without high school diplomas were to indicate the highest school grade they had completed, while those with high school diplomas were to indicate the highest diploma or degree they had obtained. |
| Concept:        | Education Variables -- PERSON                                                                                                                                                                                                                                                           |
| Start Position: | 119                                                                                                                                                                                                                                                                                     |
| End Position:   | 120                                                                                                                                                                                                                                                                                     |

| Width:                                                                                                                                                                                                                                                                                                                                                                                                                                                                                                                                                                                                                                                                                                                                                                                                                                                                                                                                                                                                                                | 2                                               |       |       |    |     |    |                     |    |               |    |               |    |           |    |            |    |            |    |                        |    |                              |    |                         |    |                                                 |    |                                        |    |                                    |    |                  |    |                |    |                     |    |                  |
|---------------------------------------------------------------------------------------------------------------------------------------------------------------------------------------------------------------------------------------------------------------------------------------------------------------------------------------------------------------------------------------------------------------------------------------------------------------------------------------------------------------------------------------------------------------------------------------------------------------------------------------------------------------------------------------------------------------------------------------------------------------------------------------------------------------------------------------------------------------------------------------------------------------------------------------------------------------------------------------------------------------------------------------|-------------------------------------------------|-------|-------|----|-----|----|---------------------|----|---------------|----|---------------|----|-----------|----|------------|----|------------|----|------------------------|----|------------------------------|----|-------------------------|----|-------------------------------------------------|----|----------------------------------------|----|------------------------------------|----|------------------|----|----------------|----|---------------------|----|------------------|
| Variable Format:                                                                                                                                                                                                                                                                                                                                                                                                                                                                                                                                                                                                                                                                                                                                                                                                                                                                                                                                                                                                                      | numeric                                         |       |       |    |     |    |                     |    |               |    |               |    |           |    |            |    |            |    |                        |    |                              |    |                         |    |                                                 |    |                                        |    |                                    |    |                  |    |                |    |                     |    |                  |
| Implied Decimal Places:                                                                                                                                                                                                                                                                                                                                                                                                                                                                                                                                                                                                                                                                                                                                                                                                                                                                                                                                                                                                               | 0                                               |       |       |    |     |    |                     |    |               |    |               |    |           |    |            |    |            |    |                        |    |                              |    |                         |    |                                                 |    |                                        |    |                                    |    |                  |    |                |    |                     |    |                  |
| <b>Categories</b>                                                                                                                                                                                                                                                                                                                                                                                                                                                                                                                                                                                                                                                                                                                                                                                                                                                                                                                                                                                                                     |                                                 |       |       |    |     |    |                     |    |               |    |               |    |           |    |            |    |            |    |                        |    |                              |    |                         |    |                                                 |    |                                        |    |                                    |    |                  |    |                |    |                     |    |                  |
| <table border="1"> <thead> <tr> <th>Value</th> <th>Label</th> </tr> </thead> <tbody> <tr> <td>00</td> <td>NIU</td> </tr> <tr> <td>01</td> <td>No school completed</td> </tr> <tr> <td>04</td> <td>1st-4th grade</td> </tr> <tr> <td>05</td> <td>5th-8th grade</td> </tr> <tr> <td>06</td> <td>9th grade</td> </tr> <tr> <td>07</td> <td>10th grade</td> </tr> <tr> <td>08</td> <td>11th grade</td> </tr> <tr> <td>09</td> <td>12th grade, no diploma</td> </tr> <tr> <td>10</td> <td>High school graduate, or GED</td> </tr> <tr> <td>11</td> <td>Some college, no degree</td> </tr> <tr> <td>12</td> <td>Associate degree, type of program not specified</td> </tr> <tr> <td>13</td> <td>Associate degree, occupational program</td> </tr> <tr> <td>14</td> <td>Associate degree, academic program</td> </tr> <tr> <td>15</td> <td>Bachelors degree</td> </tr> <tr> <td>16</td> <td>Masters degree</td> </tr> <tr> <td>17</td> <td>Professional degree</td> </tr> <tr> <td>18</td> <td>Doctorate degree</td> </tr> </tbody> </table> |                                                 | Value | Label | 00 | NIU | 01 | No school completed | 04 | 1st-4th grade | 05 | 5th-8th grade | 06 | 9th grade | 07 | 10th grade | 08 | 11th grade | 09 | 12th grade, no diploma | 10 | High school graduate, or GED | 11 | Some college, no degree | 12 | Associate degree, type of program not specified | 13 | Associate degree, occupational program | 14 | Associate degree, academic program | 15 | Bachelors degree | 16 | Masters degree | 17 | Professional degree | 18 | Doctorate degree |
| Value                                                                                                                                                                                                                                                                                                                                                                                                                                                                                                                                                                                                                                                                                                                                                                                                                                                                                                                                                                                                                                 | Label                                           |       |       |    |     |    |                     |    |               |    |               |    |           |    |            |    |            |    |                        |    |                              |    |                         |    |                                                 |    |                                        |    |                                    |    |                  |    |                |    |                     |    |                  |
| 00                                                                                                                                                                                                                                                                                                                                                                                                                                                                                                                                                                                                                                                                                                                                                                                                                                                                                                                                                                                                                                    | NIU                                             |       |       |    |     |    |                     |    |               |    |               |    |           |    |            |    |            |    |                        |    |                              |    |                         |    |                                                 |    |                                        |    |                                    |    |                  |    |                |    |                     |    |                  |
| 01                                                                                                                                                                                                                                                                                                                                                                                                                                                                                                                                                                                                                                                                                                                                                                                                                                                                                                                                                                                                                                    | No school completed                             |       |       |    |     |    |                     |    |               |    |               |    |           |    |            |    |            |    |                        |    |                              |    |                         |    |                                                 |    |                                        |    |                                    |    |                  |    |                |    |                     |    |                  |
| 04                                                                                                                                                                                                                                                                                                                                                                                                                                                                                                                                                                                                                                                                                                                                                                                                                                                                                                                                                                                                                                    | 1st-4th grade                                   |       |       |    |     |    |                     |    |               |    |               |    |           |    |            |    |            |    |                        |    |                              |    |                         |    |                                                 |    |                                        |    |                                    |    |                  |    |                |    |                     |    |                  |
| 05                                                                                                                                                                                                                                                                                                                                                                                                                                                                                                                                                                                                                                                                                                                                                                                                                                                                                                                                                                                                                                    | 5th-8th grade                                   |       |       |    |     |    |                     |    |               |    |               |    |           |    |            |    |            |    |                        |    |                              |    |                         |    |                                                 |    |                                        |    |                                    |    |                  |    |                |    |                     |    |                  |
| 06                                                                                                                                                                                                                                                                                                                                                                                                                                                                                                                                                                                                                                                                                                                                                                                                                                                                                                                                                                                                                                    | 9th grade                                       |       |       |    |     |    |                     |    |               |    |               |    |           |    |            |    |            |    |                        |    |                              |    |                         |    |                                                 |    |                                        |    |                                    |    |                  |    |                |    |                     |    |                  |
| 07                                                                                                                                                                                                                                                                                                                                                                                                                                                                                                                                                                                                                                                                                                                                                                                                                                                                                                                                                                                                                                    | 10th grade                                      |       |       |    |     |    |                     |    |               |    |               |    |           |    |            |    |            |    |                        |    |                              |    |                         |    |                                                 |    |                                        |    |                                    |    |                  |    |                |    |                     |    |                  |
| 08                                                                                                                                                                                                                                                                                                                                                                                                                                                                                                                                                                                                                                                                                                                                                                                                                                                                                                                                                                                                                                    | 11th grade                                      |       |       |    |     |    |                     |    |               |    |               |    |           |    |            |    |            |    |                        |    |                              |    |                         |    |                                                 |    |                                        |    |                                    |    |                  |    |                |    |                     |    |                  |
| 09                                                                                                                                                                                                                                                                                                                                                                                                                                                                                                                                                                                                                                                                                                                                                                                                                                                                                                                                                                                                                                    | 12th grade, no diploma                          |       |       |    |     |    |                     |    |               |    |               |    |           |    |            |    |            |    |                        |    |                              |    |                         |    |                                                 |    |                                        |    |                                    |    |                  |    |                |    |                     |    |                  |
| 10                                                                                                                                                                                                                                                                                                                                                                                                                                                                                                                                                                                                                                                                                                                                                                                                                                                                                                                                                                                                                                    | High school graduate, or GED                    |       |       |    |     |    |                     |    |               |    |               |    |           |    |            |    |            |    |                        |    |                              |    |                         |    |                                                 |    |                                        |    |                                    |    |                  |    |                |    |                     |    |                  |
| 11                                                                                                                                                                                                                                                                                                                                                                                                                                                                                                                                                                                                                                                                                                                                                                                                                                                                                                                                                                                                                                    | Some college, no degree                         |       |       |    |     |    |                     |    |               |    |               |    |           |    |            |    |            |    |                        |    |                              |    |                         |    |                                                 |    |                                        |    |                                    |    |                  |    |                |    |                     |    |                  |
| 12                                                                                                                                                                                                                                                                                                                                                                                                                                                                                                                                                                                                                                                                                                                                                                                                                                                                                                                                                                                                                                    | Associate degree, type of program not specified |       |       |    |     |    |                     |    |               |    |               |    |           |    |            |    |            |    |                        |    |                              |    |                         |    |                                                 |    |                                        |    |                                    |    |                  |    |                |    |                     |    |                  |
| 13                                                                                                                                                                                                                                                                                                                                                                                                                                                                                                                                                                                                                                                                                                                                                                                                                                                                                                                                                                                                                                    | Associate degree, occupational program          |       |       |    |     |    |                     |    |               |    |               |    |           |    |            |    |            |    |                        |    |                              |    |                         |    |                                                 |    |                                        |    |                                    |    |                  |    |                |    |                     |    |                  |
| 14                                                                                                                                                                                                                                                                                                                                                                                                                                                                                                                                                                                                                                                                                                                                                                                                                                                                                                                                                                                                                                    | Associate degree, academic program              |       |       |    |     |    |                     |    |               |    |               |    |           |    |            |    |            |    |                        |    |                              |    |                         |    |                                                 |    |                                        |    |                                    |    |                  |    |                |    |                     |    |                  |
| 15                                                                                                                                                                                                                                                                                                                                                                                                                                                                                                                                                                                                                                                                                                                                                                                                                                                                                                                                                                                                                                    | Bachelors degree                                |       |       |    |     |    |                     |    |               |    |               |    |           |    |            |    |            |    |                        |    |                              |    |                         |    |                                                 |    |                                        |    |                                    |    |                  |    |                |    |                     |    |                  |
| 16                                                                                                                                                                                                                                                                                                                                                                                                                                                                                                                                                                                                                                                                                                                                                                                                                                                                                                                                                                                                                                    | Masters degree                                  |       |       |    |     |    |                     |    |               |    |               |    |           |    |            |    |            |    |                        |    |                              |    |                         |    |                                                 |    |                                        |    |                                    |    |                  |    |                |    |                     |    |                  |
| 17                                                                                                                                                                                                                                                                                                                                                                                                                                                                                                                                                                                                                                                                                                                                                                                                                                                                                                                                                                                                                                    | Professional degree                             |       |       |    |     |    |                     |    |               |    |               |    |           |    |            |    |            |    |                        |    |                              |    |                         |    |                                                 |    |                                        |    |                                    |    |                  |    |                |    |                     |    |                  |
| 18                                                                                                                                                                                                                                                                                                                                                                                                                                                                                                                                                                                                                                                                                                                                                                                                                                                                                                                                                                                                                                    | Doctorate degree                                |       |       |    |     |    |                     |    |               |    |               |    |           |    |            |    |            |    |                        |    |                              |    |                         |    |                                                 |    |                                        |    |                                    |    |                  |    |                |    |                     |    |                  |

**Variable: "EMPSTAT"**

|                  |                                                                                                                                                                                                                                                                                                                                                                                                                                                                                                                                                                                                                                                                                                                                                                                                                                                                                                                                                                                                                                                                                                                                                                                                                                                                                                                                                                                                                                                                                                                                                                                                                                                                                                                                                                                                                                                                                                                                                                                                                                                                                                                                                                                                                                                                                                                                                                                                                                                                                                                                                                        |
|------------------|------------------------------------------------------------------------------------------------------------------------------------------------------------------------------------------------------------------------------------------------------------------------------------------------------------------------------------------------------------------------------------------------------------------------------------------------------------------------------------------------------------------------------------------------------------------------------------------------------------------------------------------------------------------------------------------------------------------------------------------------------------------------------------------------------------------------------------------------------------------------------------------------------------------------------------------------------------------------------------------------------------------------------------------------------------------------------------------------------------------------------------------------------------------------------------------------------------------------------------------------------------------------------------------------------------------------------------------------------------------------------------------------------------------------------------------------------------------------------------------------------------------------------------------------------------------------------------------------------------------------------------------------------------------------------------------------------------------------------------------------------------------------------------------------------------------------------------------------------------------------------------------------------------------------------------------------------------------------------------------------------------------------------------------------------------------------------------------------------------------------------------------------------------------------------------------------------------------------------------------------------------------------------------------------------------------------------------------------------------------------------------------------------------------------------------------------------------------------------------------------------------------------------------------------------------------------|
| Name:            | EMPSTAT                                                                                                                                                                                                                                                                                                                                                                                                                                                                                                                                                                                                                                                                                                                                                                                                                                                                                                                                                                                                                                                                                                                                                                                                                                                                                                                                                                                                                                                                                                                                                                                                                                                                                                                                                                                                                                                                                                                                                                                                                                                                                                                                                                                                                                                                                                                                                                                                                                                                                                                                                                |
| Label:           | Employment status                                                                                                                                                                                                                                                                                                                                                                                                                                                                                                                                                                                                                                                                                                                                                                                                                                                                                                                                                                                                                                                                                                                                                                                                                                                                                                                                                                                                                                                                                                                                                                                                                                                                                                                                                                                                                                                                                                                                                                                                                                                                                                                                                                                                                                                                                                                                                                                                                                                                                                                                                      |
| Variable Text:   | <p>EMPSTAT indicates whether persons were part of the labor force--working or seeking work--and, if so, whether they were currently unemployed. The variable also provides information on the activity (e.g., doing housework, attending school,) or status (e.g., retired, unable to work) of persons not in the labor force, as well as limited additional information on those who are in the labor force (e.g. members of the Armed Forces, those with a job, but not at work last week). See LABFORCE for a dichotomous variable identifying whether a person participated in the labor force.</p> <p>In the CPS, individuals' employment status was determined on the basis of answers to a series of questions relating to their activities during the preceding week. Those who reported doing any work at all for pay or profit, or working at least fifteen hours without pay in a family business or farm, were classified as "at work." Those who did not work during the previous week but who acknowledged having a job or business from which they were temporarily absent (e.g., due to illness, vacation, bad weather, or labor dispute) were also classified as employed, under the heading "has job, not at work last week."</p> <p>Because the CPS is designed to measure unemployment in the civilian population, the original employment status variable in the survey classifies members of the armed forces as NIU (Not in universe).</p> <p>Unemployed persons make up the third element of the labor force. Individuals were coded as unemployed if they did no work for pay or profit, did not have a job from which they were briefly absent, and either reported looking for work as their major activity during the previous week (for 1962 through 1993) or answered yes to a question about whether they had been looking for work in the past four weeks. People who were temporarily laid off from a job were also classified as unemployed. A separate CPS variable specifying whether an unemployed person had worked before or was looking for a first job was used to distinguish between "experienced" and "inexperienced" unemployed persons in IPUMS-CPS.</p> <p>Persons who were neither employed nor unemployed fall into the residual category, "not in labor force." Such individuals might be retired, disabled due to an illness lasting at least 6 months, occupied with other activities such as attending school or keeping house, or convinced that they are unlikely to find employment (discouraged workers).</p> |
| Concept:         | Work Variables -- PERSON                                                                                                                                                                                                                                                                                                                                                                                                                                                                                                                                                                                                                                                                                                                                                                                                                                                                                                                                                                                                                                                                                                                                                                                                                                                                                                                                                                                                                                                                                                                                                                                                                                                                                                                                                                                                                                                                                                                                                                                                                                                                                                                                                                                                                                                                                                                                                                                                                                                                                                                                               |
| Start Position:  | 121                                                                                                                                                                                                                                                                                                                                                                                                                                                                                                                                                                                                                                                                                                                                                                                                                                                                                                                                                                                                                                                                                                                                                                                                                                                                                                                                                                                                                                                                                                                                                                                                                                                                                                                                                                                                                                                                                                                                                                                                                                                                                                                                                                                                                                                                                                                                                                                                                                                                                                                                                                    |
| End Position:    | 122                                                                                                                                                                                                                                                                                                                                                                                                                                                                                                                                                                                                                                                                                                                                                                                                                                                                                                                                                                                                                                                                                                                                                                                                                                                                                                                                                                                                                                                                                                                                                                                                                                                                                                                                                                                                                                                                                                                                                                                                                                                                                                                                                                                                                                                                                                                                                                                                                                                                                                                                                                    |
| Width:           | 2                                                                                                                                                                                                                                                                                                                                                                                                                                                                                                                                                                                                                                                                                                                                                                                                                                                                                                                                                                                                                                                                                                                                                                                                                                                                                                                                                                                                                                                                                                                                                                                                                                                                                                                                                                                                                                                                                                                                                                                                                                                                                                                                                                                                                                                                                                                                                                                                                                                                                                                                                                      |
| Variable Format: | numeric                                                                                                                                                                                                                                                                                                                                                                                                                                                                                                                                                                                                                                                                                                                                                                                                                                                                                                                                                                                                                                                                                                                                                                                                                                                                                                                                                                                                                                                                                                                                                                                                                                                                                                                                                                                                                                                                                                                                                                                                                                                                                                                                                                                                                                                                                                                                                                                                                                                                                                                                                                |

Implied  
Decimal  
Places:

0

### Categories

| Value | Label                          |
|-------|--------------------------------|
| 00    | NIU                            |
| 01    | Armed Forces                   |
| 10    | At work                        |
| 12    | Has job, not at work last week |
| 20    | Unemployed                     |
| 21    | Unemployed, experienced worker |
| 22    | Unemployed, new worker         |
| 30    | Not in labor force             |
| 31    | NILF, housework                |
| 32    | NILF, unable to work           |
| 33    | NILF, school                   |
| 34    | NILF, other                    |
| 35    | NILF, unpaid, lt 15 hours      |
| 36    | NILF, retired                  |

### Variable: "OCC"

|                |                                                                                                                                                                                                                                                                                                                                                                                                                       |
|----------------|-----------------------------------------------------------------------------------------------------------------------------------------------------------------------------------------------------------------------------------------------------------------------------------------------------------------------------------------------------------------------------------------------------------------------|
| Name:          | OCC                                                                                                                                                                                                                                                                                                                                                                                                                   |
| Label:         | Occupation                                                                                                                                                                                                                                                                                                                                                                                                            |
| Variable Text: | OCC reports the person's primary occupation. Respondents who held more than one job were to report the job at which they worked the largest number of hours. For persons who were employed at the time of the survey, OCC relates to the job worked during the preceding week; unemployed persons and those not currently in the labor force were to give their most recent occupation. The CPS interviewer collected |

|                         |                                                                                                                                                                                                                                                                                                                                                                                                                                                                                             |
|-------------------------|---------------------------------------------------------------------------------------------------------------------------------------------------------------------------------------------------------------------------------------------------------------------------------------------------------------------------------------------------------------------------------------------------------------------------------------------------------------------------------------------|
|                         | information by asking what kind of work the person was doing, and Census Bureau staff coded the information into the contemporary CPS or census occupational classification. Researchers who wish to work with a consistent occupational coding scheme for 1968 forward should use the OCC1950 variable. For general discussion of employment concepts, including the definition of those not in the labor force, see the documentation on EMPSTAT.                                         |
| Concept:                | Work Variables -- PERSON                                                                                                                                                                                                                                                                                                                                                                                                                                                                    |
| Start Position:         | 123                                                                                                                                                                                                                                                                                                                                                                                                                                                                                         |
| End Position:           | 126                                                                                                                                                                                                                                                                                                                                                                                                                                                                                         |
| Width:                  | 4                                                                                                                                                                                                                                                                                                                                                                                                                                                                                           |
| Variable Format:        | numeric                                                                                                                                                                                                                                                                                                                                                                                                                                                                                     |
| Implied Decimal Places: | 0                                                                                                                                                                                                                                                                                                                                                                                                                                                                                           |
| Coder Instructions:     | <p>OCC is a 4-digit numeric variable.<br/> (Codes for 1962-1967 are 2 digits; each is preceded by two zeros).<br/> (Codes for 1968-2002 are 3 digits; each is preceded by a zero in the first position.)</p> <p>1962-1967 [URL omitted from DDI.]<br/> 1968-1970 [URL omitted from DDI.]<br/> 1971-1982 [URL omitted from DDI.]<br/> 1983-1991 [URL omitted from DDI.]<br/> 1992-2002 [URL omitted from DDI.]<br/> 2003-2010 [URL omitted from DDI.]<br/> 2011+ [URL omitted from DDI.]</p> |

### Variable: "OCC2010"

|                |                                                                                                                                                                                                                                                                                                                                                                                                                                                                                                                                                                                                                                                                                                                                                                                                                                                   |
|----------------|---------------------------------------------------------------------------------------------------------------------------------------------------------------------------------------------------------------------------------------------------------------------------------------------------------------------------------------------------------------------------------------------------------------------------------------------------------------------------------------------------------------------------------------------------------------------------------------------------------------------------------------------------------------------------------------------------------------------------------------------------------------------------------------------------------------------------------------------------|
| Name:          | OCC2010                                                                                                                                                                                                                                                                                                                                                                                                                                                                                                                                                                                                                                                                                                                                                                                                                                           |
| Label:         | Occupation, 2010 basis                                                                                                                                                                                                                                                                                                                                                                                                                                                                                                                                                                                                                                                                                                                                                                                                                            |
| Variable Text: | <p>OCC2010 is a harmonized occupation coding scheme based on the Census Bureau's 2010 occupation classification scheme. Similar variables are offered for the 1950 (OCC1950) and 1990 (OCC1990) classification codes. OCC2010 offers researchers a consistent, long-term classification of occupations.</p> <p>The occupational coding scheme in CPS data has changed several times since the 1960s. The CPS's occupational coding scheme has mirrored that of the Census Bureau, though the CPS has always introduced major coding changes one-to-three years later than the Census Bureau. All original occupational information is stored in the OCC variable. The meaning of codes in the OCC variable changes with each new coding scheme.</p> <p>In the interest of harmonization, however, the scheme has been modified to achieve the</p> |

most consistent categories across time. That is, some categories that provide more detail in the 2010 scheme were grouped together because earlier categories are inseparable when more than one occupation is coded together. For users who wish to further aggregate occupation to broader categories, the 2010 scheme is generally organized by the following groups:

Management in Business, Science, and Arts = 10-430  
 Business Operations Specialists = 500-730  
 Financial Specialists = 800-950  
 Computer and Mathematical = 1000-1240  
 Architecture and Engineering = 1300-1540  
 Technicians = 1550-1560  
 Life, Physical, and Social Science = 1600-1980  
 Community and Social Services = 2000-2060  
 Legal = 2100-2150  
 Education, Training, and Library = 2200-2550  
 Arts, Design, Entertainment, Sports, and Media = 2600-2920  
 Healthcare Practitioners and Technicians = 3000-3540  
 Healthcare Support = 3600-3650  
 Protective Service = 3700-3950  
 Food Preparation and Serving = 4000-4150  
 Building and Grounds Cleaning and Maintenance = 4200-4250  
 Personal Care and Service = 4300-4650  
 Sales and Related = 4700-4965  
 Office and Administrative Support = 5000-5940  
 Farming, Fisheries, and Forestry = 6005-6130  
 Construction = 6200-6765  
 Extraction = 6800-6940  
 Installation, Maintenance, and Repair = 7000-7630  
 Production = 7700-8965  
 Transportation and Material Moving = 9000-9750  
 Military = 9800-9830  
 No Occupation = 9920

We followed a process of constructing and testing OCC2010 that is similar to OCC1990's process, which is discussed in more detail in this BLS working paper [URL omitted from DDI.]. We performed a variety of tests to ensure that the new categories are as robust as possible over the long-term. Please also see the description tab for OCC1990 for further detail about our process.

|                         |                          |
|-------------------------|--------------------------|
| Concept:                | Work Variables -- PERSON |
| Start Position:         | 127                      |
| End Position:           | 130                      |
| Width:                  | 4                        |
| Variable Format:        | numeric                  |
| Implied Decimal Places: | 0                        |



**Categories**

| <b>Value</b> | <b>Label</b>                                              |
|--------------|-----------------------------------------------------------|
| 0010         | Chief executives and legislators/public administration    |
| 0020         | General and Operations Managers                           |
| 0030         | Managers in Marketing, Advertising, and Public Relations  |
| 0100         | Administrative Services Managers                          |
| 0110         | Computer and Information Systems Managers                 |
| 0120         | Financial Managers                                        |
| 0130         | Human Resources Managers                                  |
| 0140         | Industrial Production Managers                            |
| 0150         | Purchasing Managers                                       |
| 0160         | Transportation, Storage, and Distribution Managers        |
| 0205         | Farmers, Ranchers, and Other Agricultural Managers        |
| 0220         | Constructions Managers                                    |
| 0230         | Education Administrators                                  |
| 0300         | Architectural and Engineering Managers                    |
| 0310         | Food Service and Lodging Managers                         |
| 0320         | Funeral Directors                                         |
| 0330         | Gaming Managers                                           |
| 0350         | Medical and Health Services Managers                      |
| 0360         | Natural Science Managers                                  |
| 0410         | Property, Real Estate, and Community Association Managers |
| 0420         | Social and Community Service Managers                     |

|      |                                                                   |
|------|-------------------------------------------------------------------|
| 0430 | Managers, nec (including Postmasters)                             |
| 0500 | Agents and Business Managers of Artists, Performers, and Athletes |
| 0510 | Buyers and Purchasing Agents, Farm Products                       |
| 0520 | Wholesale and Retail Buyers, Except Farm Products                 |
| 0530 | Purchasing Agents, Except Wholesale, Retail, and Farm Products    |
| 0540 | Claims Adjusters, Appraisers, Examiners, and Investigators        |
| 0560 | Compliance Officers, Except Agriculture                           |
| 0600 | Cost Estimators                                                   |
| 0620 | Human Resources, Training, and Labor Relations Specialists        |
| 0700 | Logisticians                                                      |
| 0710 | Management Analysts                                               |
| 0720 | Meeting and Convention Planners                                   |
| 0730 | Other Business Operations and Management Specialists              |
| 0800 | Accountants and Auditors                                          |
| 0810 | Appraisers and Assessors of Real Estate                           |
| 0820 | Budget Analysts                                                   |
| 0830 | Credit Analysts                                                   |
| 0840 | Financial Analysts                                                |
| 0850 | Personal Financial Advisors                                       |
| 0860 | Insurance Underwriters                                            |
| 0900 | Financial Examiners                                               |
| 0910 | Credit Counselors and Loan Officers                               |
| 0930 | Tax Examiners and Collectors, and Revenue Agents                  |
| 0940 | Tax Preparers                                                     |

|      |                                                                                  |
|------|----------------------------------------------------------------------------------|
| 0950 | Financial Specialists, nec                                                       |
| 1000 | Computer Scientists and Systems Analysts/Network systems Analysts/Web Developers |
| 1010 | Computer Programmers                                                             |
| 1020 | Software Developers, Applications and Systems Software                           |
| 1050 | Computer Support Specialists                                                     |
| 1060 | Database Administrators                                                          |
| 1100 | Network and Computer Systems Administrators                                      |
| 1200 | Actuaries                                                                        |
| 1220 | Operations Research Analysts                                                     |
| 1230 | Statisticians                                                                    |
| 1240 | Mathematical science occupations, nec                                            |
| 1300 | Architects, Except Naval                                                         |
| 1310 | Surveyors, Cartographers, and Photogrammetrists                                  |
| 1320 | Aerospace Engineers                                                              |
| 1350 | Chemical Engineers                                                               |
| 1360 | Civil Engineers                                                                  |
| 1400 | Computer Hardware Engineers                                                      |
| 1410 | Electrical and Electronics Engineers                                             |
| 1420 | Environmental Engineers                                                          |
| 1430 | Industrial Engineers, including Health and Safety                                |
| 1440 | Marine Engineers and Naval Architects                                            |
| 1450 | Materials Engineers                                                              |
| 1460 | Mechanical Engineers                                                             |
| 1520 | Petroleum, mining and geological engineers, including mining safety engineers    |

|      |                                                               |
|------|---------------------------------------------------------------|
| 1530 | Engineers, nec                                                |
| 1540 | Drafters                                                      |
| 1550 | Engineering Technicians, Except Drafters                      |
| 1560 | Surveying and Mapping Technicians                             |
| 1600 | Agricultural and Food Scientists                              |
| 1610 | Biological Scientists                                         |
| 1640 | Conservation Scientists and Foresters                         |
| 1650 | Medical Scientists, and Life Scientists, All Other            |
| 1700 | Astronomers and Physicists                                    |
| 1710 | Atmospheric and Space Scientists                              |
| 1720 | Chemists and Materials Scientists                             |
| 1740 | Environmental Scientists and Geoscientists                    |
| 1760 | Physical Scientists, nec                                      |
| 1800 | Economists and market researchers                             |
| 1820 | Psychologists                                                 |
| 1830 | Urban and Regional Planners                                   |
| 1840 | Social Scientists, nec                                        |
| 1900 | Agricultural and Food Science Technicians                     |
| 1910 | Biological Technicians                                        |
| 1920 | Chemical Technicians                                          |
| 1930 | Geological and Petroleum Technicians, and Nuclear Technicians |
| 1960 | Life, Physical, and Social Science Technicians, nec           |
| 1980 | Professional, Research, or Technical Workers, nec             |
| 2000 | Counselors                                                    |

|      |                                                              |
|------|--------------------------------------------------------------|
| 2010 | Social Workers                                               |
| 2020 | Community and Social Service Specialists, nec                |
| 2040 | Clergy                                                       |
| 2050 | Directors, Religious Activities and Education                |
| 2060 | Religious Workers, nec                                       |
| 2100 | Lawyers, and judges, magistrates, and other judicial workers |
| 2140 | Paralegals and Legal Assistants                              |
| 2150 | Legal Support Workers, nec                                   |
| 2200 | Postsecondary Teachers                                       |
| 2300 | Preschool and Kindergarten Teachers                          |
| 2310 | Elementary and Middle School Teachers                        |
| 2320 | Secondary School Teachers                                    |
| 2330 | Special Education Teachers                                   |
| 2340 | Other Teachers and Instructors                               |
| 2400 | Archivists, Curators, and Museum Technicians                 |
| 2430 | Librarians                                                   |
| 2440 | Library Technicians                                          |
| 2540 | Teacher Assistants                                           |
| 2550 | Education, Training, and Library Workers, nec                |
| 2600 | Artists and Related Workers                                  |
| 2630 | Designers                                                    |
| 2700 | Actors, Producers, and Directors                             |
| 2720 | Athletes, Coaches, Umpires, and Related Workers              |
| 2740 | Dancers and Choreographers                                   |

|      |                                                                                                                           |
|------|---------------------------------------------------------------------------------------------------------------------------|
| 2750 | Musicians, Singers, and Related Workers                                                                                   |
| 2760 | Entertainers and Performers, Sports and Related Workers, All Other                                                        |
| 2800 | Announcers                                                                                                                |
| 2810 | Editors, News Analysts, Reporters, and Correspondents                                                                     |
| 2825 | Public Relations Specialists                                                                                              |
| 2840 | Technical Writers                                                                                                         |
| 2850 | Writers and Authors                                                                                                       |
| 2860 | Media and Communication Workers, nec                                                                                      |
| 2900 | Broadcast and Sound Engineering Technicians and Radio Operators, and media and communication equipment workers, all other |
| 2910 | Photographers                                                                                                             |
| 2920 | Television, Video, and Motion Picture Camera Operators and Editors                                                        |
| 3000 | Chiropractors                                                                                                             |
| 3010 | Dentists                                                                                                                  |
| 3030 | Dieticians and Nutritionists                                                                                              |
| 3040 | Optometrists                                                                                                              |
| 3050 | Pharmacists                                                                                                               |
| 3060 | Physicians and Surgeons                                                                                                   |
| 3110 | Physician Assistants                                                                                                      |
| 3120 | Podiatrists                                                                                                               |
| 3130 | Registered Nurses                                                                                                         |
| 3140 | Audiologists                                                                                                              |
| 3150 | Occupational Therapists                                                                                                   |
| 3160 | Physical Therapists                                                                                                       |

|      |                                                                  |
|------|------------------------------------------------------------------|
| 3200 | Radiation Therapists                                             |
| 3210 | Recreational Therapists                                          |
| 3220 | Respiratory Therapists                                           |
| 3230 | Speech Language Pathologists                                     |
| 3240 | Therapists, nec                                                  |
| 3250 | Veterinarians                                                    |
| 3260 | Health Diagnosing and Treating Practitioners, nec                |
| 3300 | Clinical Laboratory Technologists and Technicians                |
| 3310 | Dental Hygienists                                                |
| 3320 | Diagnostic Related Technologists and Technicians                 |
| 3400 | Emergency Medical Technicians and Paramedics                     |
| 3410 | Health Diagnosing and Treating Practitioner Support Technicians  |
| 3500 | Licensed Practical and Licensed Vocational Nurses                |
| 3510 | Medical Records and Health Information Technicians               |
| 3520 | Opticians, Dispensing                                            |
| 3530 | Health Technologists and Technicians, nec                        |
| 3540 | Healthcare Practitioners and Technical Occupations, nec          |
| 3600 | Nursing, Psychiatric, and Home Health Aides                      |
| 3610 | Occupational Therapy Assistants and Aides                        |
| 3620 | Physical Therapist Assistants and Aides                          |
| 3630 | Massage Therapists                                               |
| 3640 | Dental Assistants                                                |
| 3650 | Medical Assistants and Other Healthcare Support Occupations, nec |
| 3700 | First-Line Supervisors of Correctional Officers                  |

|      |                                                                    |
|------|--------------------------------------------------------------------|
| 3710 | First-Line Supervisors of Police and Detectives                    |
| 3720 | First-Line Supervisors of Fire Fighting and Prevention Workers     |
| 3730 | Supervisors, Protective Service Workers, All Other                 |
| 3740 | Firefighters                                                       |
| 3750 | Fire Inspectors                                                    |
| 3800 | Sheriffs, Bailiffs, Correctional Officers, and Jailers             |
| 3820 | Police Officers and Detectives                                     |
| 3900 | Animal Control                                                     |
| 3910 | Private Detectives and Investigators                               |
| 3930 | Security Guards and Gaming Surveillance Officers                   |
| 3940 | Crossing Guards                                                    |
| 3950 | Law enforcement workers, nec                                       |
| 4000 | Chefs and Cooks                                                    |
| 4010 | First-Line Supervisors of Food Preparation and Serving Workers     |
| 4030 | Food Preparation Workers                                           |
| 4040 | Bartenders                                                         |
| 4050 | Combined Food Preparation and Serving Workers, Including Fast Food |
| 4060 | Counter Attendant, Cafeteria, Food Concession, and Coffee Shop     |
| 4110 | Waiters and Waitresses                                             |
| 4120 | Food Servers, Nonrestaurant                                        |
| 4130 | Food preparation and serving related workers, nec                  |
| 4140 | Dishwashers                                                        |
| 4150 | Host and Hostesses, Restaurant, Lounge, and Coffee Shop            |
| 4200 | First-Line Supervisors of Housekeeping and Janitorial Workers      |



|      |                                                                                 |
|------|---------------------------------------------------------------------------------|
| 4210 | First-Line Supervisors of Landscaping, Lawn Service, and Groundskeeping Workers |
| 4220 | Janitors and Building Cleaners                                                  |
| 4230 | Maids and Housekeeping Cleaners                                                 |
| 4240 | Pest Control Workers                                                            |
| 4250 | Grounds Maintenance Workers                                                     |
| 4300 | First-Line Supervisors of Gaming Workers                                        |
| 4320 | First-Line Supervisors of Personal Service Workers                              |
| 4340 | Animal Trainers                                                                 |
| 4350 | Nonfarm Animal Caretakers                                                       |
| 4400 | Gaming Services Workers                                                         |
| 4420 | Ushers, Lobby Attendants, and Ticket Takers                                     |
| 4430 | Entertainment Attendants and Related Workers, nec                               |
| 4460 | Funeral Service Workers and Embalmers                                           |
| 4500 | Barbers                                                                         |
| 4510 | Hairdressers, Hairstylists, and Cosmetologists                                  |
| 4520 | Personal Appearance Workers, nec                                                |
| 4530 | Baggage Porters, Bellhops, and Concierges                                       |
| 4540 | Tour and Travel Guides                                                          |
| 4600 | Childcare Workers                                                               |
| 4610 | Personal Care Aides                                                             |
| 4620 | Recreation and Fitness Workers                                                  |
| 4640 | Residential Advisors                                                            |
| 4650 | Personal Care and Service Workers, All Other                                    |
| 4700 | First-Line Supervisors of Sales Workers                                         |

|      |                                                                          |
|------|--------------------------------------------------------------------------|
| 4720 | Cashiers                                                                 |
| 4740 | Counter and Rental Clerks                                                |
| 4750 | Parts Salespersons                                                       |
| 4760 | Retail Salespersons                                                      |
| 4800 | Advertising Sales Agents                                                 |
| 4810 | Insurance Sales Agents                                                   |
| 4820 | Securities, Commodities, and Financial Services Sales Agents             |
| 4830 | Travel Agents                                                            |
| 4840 | Sales Representatives, Services, All Other                               |
| 4850 | Sales Representatives, Wholesale and Manufacturing                       |
| 4900 | Models, Demonstrators, and Product Promoters                             |
| 4920 | Real Estate Brokers and Sales Agents                                     |
| 4930 | Sales Engineers                                                          |
| 4940 | Telemarketers                                                            |
| 4950 | Door-to-Door Sales Workers, News and Street Vendors, and Related Workers |
| 4965 | Sales and Related Workers, All Other                                     |
| 5000 | First-Line Supervisors of Office and Administrative Support Workers      |
| 5010 | Switchboard Operators, Including Answering Service                       |
| 5020 | Telephone Operators                                                      |
| 5030 | Communications Equipment Operators, All Other                            |
| 5100 | Bill and Account Collectors                                              |
| 5110 | Billing and Posting Clerks                                               |
| 5120 | Bookkeeping, Accounting, and Auditing Clerks                             |
| 5130 | Gaming Cage Workers                                                      |

|      |                                                                |
|------|----------------------------------------------------------------|
| 5140 | Payroll and Timekeeping Clerks                                 |
| 5150 | Procurement Clerks                                             |
| 5160 | Bank Tellers                                                   |
| 5165 | Financial Clerks, nec                                          |
| 5200 | Brokerage Clerks                                               |
| 5220 | Court, Municipal, and License Clerks                           |
| 5230 | Credit Authorizers, Checkers, and Clerks                       |
| 5240 | Customer Service Representatives                               |
| 5250 | Eligibility Interviewers, Government Programs                  |
| 5260 | File Clerks                                                    |
| 5300 | Hotel, Motel, and Resort Desk Clerks                           |
| 5310 | Interviewers, Except Eligibility and Loan                      |
| 5320 | Library Assistants, Clerical                                   |
| 5330 | Loan Interviewers and Clerks                                   |
| 5340 | New Account Clerks                                             |
| 5350 | Correspondent clerks and order clerks                          |
| 5360 | Human Resources Assistants, Except Payroll and Timekeeping     |
| 5400 | Receptionists and Information Clerks                           |
| 5410 | Reservation and Transportation Ticket Agents and Travel Clerks |
| 5420 | Information and Record Clerks, All Other                       |
| 5500 | Cargo and Freight Agents                                       |
| 5510 | Couriers and Messengers                                        |
| 5520 | Dispatchers                                                    |
| 5530 | Meter Readers, Utilities                                       |

|      |                                                                           |
|------|---------------------------------------------------------------------------|
| 5540 | Postal Service Clerks                                                     |
| 5550 | Postal Service Mail Carriers                                              |
| 5560 | Postal Service Mail Sorters, Processors, and Processing Machine Operators |
| 5600 | Production, Planning, and Expediting Clerks                               |
| 5610 | Shipping, Receiving, and Traffic Clerks                                   |
| 5620 | Stock Clerks and Order Fillers                                            |
| 5630 | Weighers, Measurers, Checkers, and Samplers, Recordkeeping                |
| 5700 | Secretaries and Administrative Assistants                                 |
| 5800 | Computer Operators                                                        |
| 5810 | Data Entry Keyers                                                         |
| 5820 | Word Processors and Typists                                               |
| 5840 | Insurance Claims and Policy Processing Clerks                             |
| 5850 | Mail Clerks and Mail Machine Operators, Except Postal Service             |
| 5860 | Office Clerks, General                                                    |
| 5900 | Office Machine Operators, Except Computer                                 |
| 5910 | Proofreaders and Copy Markers                                             |
| 5920 | Statistical Assistants                                                    |
| 5940 | Office and administrative support workers, nec                            |
| 6005 | First-Line Supervisors of Farming, Fishing, and Forestry Workers          |
| 6010 | Agricultural Inspectors                                                   |
| 6040 | Graders and Sorters, Agricultural Products                                |
| 6050 | Agricultural workers, nec                                                 |
| 6100 | Fishing and hunting workers                                               |
| 6120 | Forest and Conservation Workers                                           |

|      |                                                                                            |
|------|--------------------------------------------------------------------------------------------|
| 6130 | Logging Workers                                                                            |
| 6200 | First-Line Supervisors of Construction Trades and Extraction Workers                       |
| 6210 | Boilermakers                                                                               |
| 6220 | Brickmasons, Blockmasons, and Stonemasons                                                  |
| 6230 | Carpenters                                                                                 |
| 6240 | Carpet, Floor, and Tile Installers and Finishers                                           |
| 6250 | Cement Masons, Concrete Finishers, and Terrazzo Workers                                    |
| 6260 | Construction Laborers                                                                      |
| 6300 | Paving, Surfacing, and Tamping Equipment Operators                                         |
| 6320 | Construction equipment operators except paving, surfacing, and tamping equipment operators |
| 6330 | Drywall Installers, Ceiling Tile Installers, and Tapers                                    |
| 6355 | Electricians                                                                               |
| 6360 | Glaziers                                                                                   |
| 6400 | Insulation Workers                                                                         |
| 6420 | Painters, Construction and Maintenance                                                     |
| 6430 | Paperhangers                                                                               |
| 6440 | Pipelayers, Plumbers, Pipefitters, and Steamfitters                                        |
| 6460 | Plasterers and Stucco Masons                                                               |
| 6500 | Reinforcing Iron and Rebar Workers                                                         |
| 6515 | Roofers                                                                                    |
| 6520 | Sheet Metal Workers, metal-working                                                         |
| 6530 | Structural Iron and Steel Workers                                                          |
| 6600 | Helpers, Construction Trades                                                               |

|      |                                                                                            |
|------|--------------------------------------------------------------------------------------------|
| 6660 | Construction and Building Inspectors                                                       |
| 6700 | Elevator Installers and Repairers                                                          |
| 6710 | Fence Erectors                                                                             |
| 6720 | Hazardous Materials Removal Workers                                                        |
| 6730 | Highway Maintenance Workers                                                                |
| 6740 | Rail-Track Laying and Maintenance Equipment Operators                                      |
| 6765 | Construction workers, nec                                                                  |
| 6800 | Derrick, rotary drill, and service unit operators, and roustabouts, oil, gas, and mining   |
| 6820 | Earth Drillers, Except Oil and Gas                                                         |
| 6830 | Explosives Workers, Ordnance Handling Experts, and Blasters                                |
| 6840 | Mining Machine Operators                                                                   |
| 6940 | Extraction workers, nec                                                                    |
| 7000 | First-Line Supervisors of Mechanics, Installers, and Repairers                             |
| 7010 | Computer, Automated Teller, and Office Machine Repairers                                   |
| 7020 | Radio and Telecommunications Equipment Installers and Repairers                            |
| 7030 | Avionics Technicians                                                                       |
| 7040 | Electric Motor, Power Tool, and Related Repairers                                          |
| 7100 | Electrical and electronics repairers, transportation equipment, and industrial and utility |
| 7110 | Electronic Equipment Installers and Repairers, Motor Vehicles                              |
| 7120 | Electronic Home Entertainment Equipment Installers and Repairers                           |
| 7125 | Electronic Repairs, nec                                                                    |
| 7130 | Security and Fire Alarm Systems Installers                                                 |
| 7140 | Aircraft Mechanics and Service Technicians                                                 |
| 7150 | Automotive Body and Related Repairers                                                      |

|      |                                                                                                                                                              |
|------|--------------------------------------------------------------------------------------------------------------------------------------------------------------|
| 7160 | Automotive Glass Installers and Repairers                                                                                                                    |
| 7200 | Automotive Service Technicians and Mechanics                                                                                                                 |
| 7210 | Bus and Truck Mechanics and Diesel Engine Specialists                                                                                                        |
| 7220 | Heavy Vehicle and Mobile Equipment Service Technicians and Mechanics                                                                                         |
| 7240 | Small Engine Mechanics                                                                                                                                       |
| 7260 | Vehicle and Mobile Equipment Mechanics, Installers, and Repairers, nec                                                                                       |
| 7300 | Control and Valve Installers and Repairers                                                                                                                   |
| 7315 | Heating, Air Conditioning, and Refrigeration Mechanics and Installers                                                                                        |
| 7320 | Home Appliance Repairers                                                                                                                                     |
| 7330 | Industrial and Refractory Machinery Mechanics                                                                                                                |
| 7340 | Maintenance and Repair Workers, General                                                                                                                      |
| 7350 | Maintenance Workers, Machinery                                                                                                                               |
| 7360 | Millwrights                                                                                                                                                  |
| 7410 | Electrical Power-Line Installers and Repairers                                                                                                               |
| 7420 | Telecommunications Line Installers and Repairers                                                                                                             |
| 7430 | Precision Instrument and Equipment Repairers                                                                                                                 |
| 7510 | Coin, Vending, and Amusement Machine Servicers and Repairers                                                                                                 |
| 7540 | Locksmiths and Safe Repairers                                                                                                                                |
| 7550 | Manufactured Building and Mobile Home Installers                                                                                                             |
| 7560 | Riggers                                                                                                                                                      |
| 7610 | Helpers--Installation, Maintenance, and Repair Workers                                                                                                       |
| 7630 | Other Installation, Maintenance, and Repair Workers Including Wind Turbine Service Technicians, and Commercial Divers, and Signal and Track Switch Repairers |
| 7700 | First-Line Supervisors of Production and Operating Workers                                                                                                   |

|      |                                                                                                           |
|------|-----------------------------------------------------------------------------------------------------------|
| 7710 | Aircraft Structure, Surfaces, Rigging, and Systems Assemblers                                             |
| 7720 | Electrical, Electronics, and Electromechanical Assemblers                                                 |
| 7730 | Engine and Other Machine Assemblers                                                                       |
| 7740 | Structural Metal Fabricators and Fitters                                                                  |
| 7750 | Assemblers and Fabricators, nec                                                                           |
| 7800 | Bakers                                                                                                    |
| 7810 | Butchers and Other Meat, Poultry, and Fish Processing Workers                                             |
| 7830 | Food and Tobacco Roasting, Baking, and Drying Machine Operators and Tenders                               |
| 7840 | Food Batchmakers                                                                                          |
| 7850 | Food Cooking Machine Operators and Tenders                                                                |
| 7855 | Food Processing, nec                                                                                      |
| 7900 | Computer Control Programmers and Operators                                                                |
| 7920 | Extruding and Drawing Machine Setters, Operators, and Tenders, Metal and Plastic                          |
| 7930 | Forging Machine Setters, Operators, and Tenders, Metal and Plastic                                        |
| 7940 | Rolling Machine Setters, Operators, and Tenders, metal and Plastic                                        |
| 7950 | Cutting, Punching, and Press Machine Setters, Operators, and Tenders, Metal and Plastic                   |
| 7960 | Drilling and Boring Machine Tool Setters, Operators, and Tenders, Metal and Plastic                       |
| 8000 | Grinding, Lapping, Polishing, and Buffing Machine Tool Setters, Operators, and Tenders, Metal and Plastic |
| 8010 | Lathe and Turning Machine Tool Setters, Operators, and Tenders, Metal and Plastic                         |
| 8030 | Machinists                                                                                                |
| 8040 | Metal Furnace Operators, Tenders, Pourers, and Casters                                                    |
| 8060 | Model Makers and Patternmakers, Metal and Plastic                                                         |
| 8100 | Molders and Molding Machine Setters, Operators, and Tenders, Metal and Plastic                            |



|      |                                                                                    |
|------|------------------------------------------------------------------------------------|
| 8130 | Tool and Die Makers                                                                |
| 8140 | Welding, Soldering, and Brazing Workers                                            |
| 8150 | Heat Treating Equipment Setters, Operators, and Tenders, Metal and Plastic         |
| 8200 | Plating and Coating Machine Setters, Operators, and Tenders, Metal and Plastic     |
| 8210 | Tool Grinders, Filers, and Sharpeners                                              |
| 8220 | Metal workers and plastic workers, nec                                             |
| 8230 | Bookbinders, Printing Machine Operators, and Job Printers                          |
| 8250 | Prepress Technicians and Workers                                                   |
| 8300 | Laundry and Dry-Cleaning Workers                                                   |
| 8310 | Pressers, Textile, Garment, and Related Materials                                  |
| 8320 | Sewing Machine Operators                                                           |
| 8330 | Shoe and Leather Workers and Repairers                                             |
| 8340 | Shoe Machine Operators and Tenders                                                 |
| 8350 | Tailors, Dressmakers, and Sewers                                                   |
| 8400 | Textile bleaching and dyeing, and cutting machine setters, operators, and tenders  |
| 8410 | Textile Knitting and Weaving Machine Setters, Operators, and Tenders               |
| 8420 | Textile Winding, Twisting, and Drawing Out Machine Setters, Operators, and Tenders |
| 8450 | Upholsterers                                                                       |
| 8460 | Textile, Apparel, and Furnishings workers, nec                                     |
| 8500 | Cabinetmakers and Bench Carpenters                                                 |
| 8510 | Furniture Finishers                                                                |
| 8530 | Sawing Machine Setters, Operators, and Tenders, Wood                               |
| 8540 | Woodworking Machine Setters, Operators, and Tenders, Except Sawing                 |
| 8550 | Woodworkers including model makers and patternmakers, nec                          |

|      |                                                                                                          |
|------|----------------------------------------------------------------------------------------------------------|
| 8600 | Power Plant Operators, Distributors, and Dispatchers                                                     |
| 8610 | Stationary Engineers and Boiler Operators                                                                |
| 8620 | Water Wastewater Treatment Plant and System Operators                                                    |
| 8630 | Plant and System Operators, nec                                                                          |
| 8640 | Chemical Processing Machine Setters, Operators, and Tenders                                              |
| 8650 | Crushing, Grinding, Polishing, Mixing, and Blending Workers                                              |
| 8710 | Cutting Workers                                                                                          |
| 8720 | Extruding, Forming, Pressing, and Compacting Machine Setters, Operators, and Tenders                     |
| 8730 | Furnace, Kiln, Oven, Drier, and Kettle Operators and Tenders                                             |
| 8740 | Inspectors, Testers, Sorters, Samplers, and Weighers                                                     |
| 8750 | Jewelers and Precious Stone and Metal Workers                                                            |
| 8760 | Medical, Dental, and Ophthalmic Laboratory Technicians                                                   |
| 8800 | Packaging and Filling Machine Operators and Tenders                                                      |
| 8810 | Painting Workers and Dyers                                                                               |
| 8830 | Photographic Process Workers and Processing Machine Operators                                            |
| 8850 | Adhesive Bonding Machine Operators and Tenders                                                           |
| 8860 | Cleaning, Washing, and Metal Pickling Equipment Operators and Tenders                                    |
| 8910 | Etchers, Engravers, and Lithographers                                                                    |
| 8920 | Molders, Shapers, and Casters, Except Metal and Plastic                                                  |
| 8930 | Paper Goods Machine Setters, Operators, and Tenders                                                      |
| 8940 | Tire Builders                                                                                            |
| 8950 | Helpers--Production Workers                                                                              |
| 8965 | Other production workers including semiconductor processors and cooling and freezing equipment operators |

|      |                                                               |
|------|---------------------------------------------------------------|
| 9000 | Supervisors of Transportation and Material Moving Workers     |
| 9030 | Aircraft Pilots and Flight Engineers                          |
| 9040 | Air Traffic Controllers and Airfield Operations Specialists   |
| 9050 | Flight Attendants and Transportation Workers and Attendants   |
| 9100 | Bus and Ambulance Drivers and Attendants                      |
| 9130 | Driver/Sales Workers and Truck Drivers                        |
| 9140 | Taxi Drivers and Chauffeurs                                   |
| 9150 | Motor Vehicle Operators, All Other                            |
| 9200 | Locomotive Engineers and Operators                            |
| 9230 | Railroad Brake, Signal, and Switch Operators                  |
| 9240 | Railroad Conductors and Yardmasters                           |
| 9260 | Subway, Streetcar, and Other Rail Transportation Workers      |
| 9300 | Sailors and marine oilers, and ship engineers                 |
| 9310 | Ship and Boat Captains and Operators                          |
| 9350 | Parking Lot Attendants                                        |
| 9360 | Automotive and Watercraft Service Attendants                  |
| 9410 | Transportation Inspectors                                     |
| 9420 | Transportation workers, nec                                   |
| 9510 | Crane and Tower Operators                                     |
| 9520 | Dredge, Excavating, and Loading Machine Operators             |
| 9560 | Conveyor operators and tenders, and hoist and winch operators |
| 9600 | Industrial Truck and Tractor Operators                        |
| 9610 | Cleaners of Vehicles and Equipment                            |
| 9620 | Laborers and Freight, Stock, and Material Movers, Hand        |

|      |                                                                                    |
|------|------------------------------------------------------------------------------------|
| 9630 | Machine Feeders and Offbearers                                                     |
| 9640 | Packers and Packagers, Hand                                                        |
| 9650 | Pumping Station Operators                                                          |
| 9720 | Refuse and Recyclable Material Collectors                                          |
| 9750 | Material moving workers, nec                                                       |
| 9800 | Military Officer Special and Tactical Operations Leaders                           |
| 9810 | First-Line Enlisted Military Supervisors                                           |
| 9820 | Military Enlisted Tactical Operations and Air/Weapons Specialists and Crew Members |
| 9830 | Military, Rank Not Specified                                                       |
| 9920 | Unemployed, with No Work Experience in the Last 5 Years or Earlier or Never Worked |
| 9999 | Unknown                                                                            |

### Variable: "OCC1990"

|                |                                                                                                                                                                                                                                                                                                                                                                                                                                                                                                                                                                                                                                                                                                                                                                                                                                                                                                                                                                                                                                                                                                                                                                                                                                                                                                                                                                                                                                                                                                                                                                                                                                                                                                               |
|----------------|---------------------------------------------------------------------------------------------------------------------------------------------------------------------------------------------------------------------------------------------------------------------------------------------------------------------------------------------------------------------------------------------------------------------------------------------------------------------------------------------------------------------------------------------------------------------------------------------------------------------------------------------------------------------------------------------------------------------------------------------------------------------------------------------------------------------------------------------------------------------------------------------------------------------------------------------------------------------------------------------------------------------------------------------------------------------------------------------------------------------------------------------------------------------------------------------------------------------------------------------------------------------------------------------------------------------------------------------------------------------------------------------------------------------------------------------------------------------------------------------------------------------------------------------------------------------------------------------------------------------------------------------------------------------------------------------------------------|
| Name:          | OCC1990                                                                                                                                                                                                                                                                                                                                                                                                                                                                                                                                                                                                                                                                                                                                                                                                                                                                                                                                                                                                                                                                                                                                                                                                                                                                                                                                                                                                                                                                                                                                                                                                                                                                                                       |
| Label:         | Occupation, 1990 basis                                                                                                                                                                                                                                                                                                                                                                                                                                                                                                                                                                                                                                                                                                                                                                                                                                                                                                                                                                                                                                                                                                                                                                                                                                                                                                                                                                                                                                                                                                                                                                                                                                                                                        |
| Variable Text: | <p>OCC1990 is a modified version of the 1990 Census Bureau occupational classification scheme. Like OCC1950, OCC1990 offers researchers a consistent long-term classification of occupations.</p> <p>The occupational coding scheme in CPS data has changed several times since the 1960s. The CPS's occupational coding scheme has mirrored that of the Census Bureau, though the CPS has always introduced major coding changes one-to-three years later than the Census Bureau. All original occupational information is stored in the OCC variable. The meaning of codes in the OCC variable changes with each new coding scheme.</p> <p>We chose the 1990 scheme as the standard for OCC1990 so that no year's occupational data would be forced to bridge both of the two most significant changes in census-based coding schemes: from 1970 to 1980 and from 1990 to 2000. In OCC1990, all samples from 1968 onwards bridge no more than one of these major shifts. For this reason, the variable may be preferable to OCC1950 for the samples from 1980 onward. Sensitivity testing suggests that OCC1990 performs very similarly to OCC1950 for most purposes.</p> <p>The original 1990 occupational scheme [URL omitted from DDI.] has 514 categories. OCC1990 combines a number of occupational categories to maximize the variable's consistency over time. The resulting OCC1990 classification scheme contains 389 categories (see the "Codes and Frequencies" link above). Many users will want to further aggregate categories into the broad occupational categories implicit in the 1990 scheme: Managerial and Professional (000-200); Technical, Sales, and Administrative (201-400);</p> |

Service (401-470); Farming, Forestry, and Fishing (471-500); Precision Production, Craft, and Repairers (501-700); Operatives and Laborers (701-900); Non-occupational responses (900-999).

OCC1990 was created using a series of technical papers published by the Census Bureau shortly after each census was administered. These papers provide detailed analyses of how the occupational coding scheme for each census year differed from the scheme used during the previous census year. These occupational "crosswalks" are based on samples of cases that are "double coded" into the occupational schemes of the current and previous census year. The original Census Bureau crosswalks are available via links in "Occupation and Industry Variables" [URL omitted from DDI.] of the IPUMS-USA documentation.

Using the information from the occupational crosswalks, we traced the proportion of each occupation as it broke out into more specific occupations or as it was combined with others into a more general occupation. To take one example from the technical paper produced after the 2000 census: of persons coded as "Gaming managers" in 2000 (2000 code 33), the Census Bureau determined that 35% would have been coded as "Managers, service organizations" in 1990 (1990 code 21), while 65% would have been coded as "Managers, food serving and lodging establishments" (1990 code 17). Thus, OCC1990 assigns a code of 17 to the cases in the 2000 IPUMS sample having an original 2000 OCC value of 33. We generated the same information for every occupational code in every census year from 1960-2000.

Researchers at the Bureau of Labor Statistics (BLS) then used the resulting tables to create aggregated occupational categories that were more useful for long-term analyses. We have performed a variety of tests to ensure that the new categories are as robust as possible over the long-term. More specifics on their methods and a detailed comparison of OCC1950 and OCC1990 can be found in the BLS Working Paper [URL omitted from DDI.] on the topic.

Concept: Work Variables -- PERSON

Start Position: 131

End Position: 133

Width: 3

Variable Format: numeric

Implied Decimal Places: 0

#### Categories

| Value | Label       |
|-------|-------------|
| 003   | Legislators |

|     |                                                                          |
|-----|--------------------------------------------------------------------------|
| 004 | Chief executives and public administrators                               |
| 007 | Financial managers                                                       |
| 008 | Human resources and labor relations managers                             |
| 013 | Managers and specialists in marketing, advertising, and public relations |
| 014 | Managers in education and related fields                                 |
| 015 | Managers of medicine and health occupations                              |
| 016 | Postmasters and mail superintendents                                     |
| 017 | Managers of food-serving and lodging establishments                      |
| 018 | Managers of properties and real estate                                   |
| 019 | Funeral directors                                                        |
| 021 | Managers of service organizations, n.e.c.                                |
| 022 | Managers and administrators, n.e.c.                                      |
| 023 | Accountants and auditors                                                 |
| 024 | Insurance underwriters                                                   |
| 025 | Other financial specialists                                              |
| 026 | Management analysts                                                      |
| 027 | Personnel, HR, training, and labor relations specialists                 |
| 028 | Purchasing agents and buyers, of farm products                           |
| 029 | Buyers, wholesale and retail trade                                       |
| 033 | Purchasing managers, agents and buyers, n.e.c.                           |
| 034 | Business and promotion agents                                            |
| 035 | Construction inspectors                                                  |
| 036 | Inspectors and compliance officers, outside construction                 |
| 037 | Management support occupations                                           |

|     |                                                          |
|-----|----------------------------------------------------------|
| 043 | Architects                                               |
| 044 | Aerospace engineer                                       |
| 045 | Metallurgical and materials engineers, variously phrased |
| 047 | Petroleum, mining, and geological engineers              |
| 048 | Chemical engineers                                       |
| 053 | Civil engineers                                          |
| 055 | Electrical engineer                                      |
| 056 | Industrial engineers                                     |
| 057 | Mechanical engineers                                     |
| 059 | Not-elsewhere-classified engineers                       |
| 064 | Computer systems analysts and computer scientists        |
| 065 | Operations and systems researchers and analysts          |
| 066 | Actuaries                                                |
| 067 | Statisticians                                            |
| 068 | Mathematicians and mathematical scientists               |
| 069 | Physicists and astronomers                               |
| 073 | Chemists                                                 |
| 074 | Atmospheric and space scientists                         |
| 075 | Geologists                                               |
| 076 | Physical scientists, n.e.c.                              |
| 077 | Agricultural and food scientists                         |
| 078 | Biological scientists                                    |
| 079 | Foresters and conservation scientists                    |
| 083 | Medical scientists                                       |

|     |                                                      |
|-----|------------------------------------------------------|
| 084 | Physicians                                           |
| 085 | Dentists                                             |
| 086 | Veterinarians                                        |
| 087 | Optometrists                                         |
| 088 | Podiatrists                                          |
| 089 | Other health and therapy                             |
| 095 | Registered nurses                                    |
| 096 | Pharmacists                                          |
| 097 | Dietitians and nutritionists                         |
| 098 | Respiratory therapists                               |
| 099 | Occupational therapists                              |
| 103 | Physical therapists                                  |
| 104 | Speech therapists                                    |
| 105 | Therapists, n.e.c.                                   |
| 106 | Physicians' assistants                               |
| 113 | Earth, environmental, and marine science instructors |
| 114 | Biological science instructors                       |
| 115 | Chemistry instructors                                |
| 116 | Physics instructors                                  |
| 118 | Psychology instructors                               |
| 119 | Economics instructors                                |
| 123 | History instructors                                  |
| 125 | Sociology instructors                                |
| 127 | Engineering instructors                              |



|     |                                                        |
|-----|--------------------------------------------------------|
| 128 | Math instructors                                       |
| 139 | Education instructors                                  |
| 145 | Law instructors                                        |
| 147 | Theology instructors                                   |
| 149 | Home economics instructors                             |
| 150 | Humanities profs/instructors, college, nec             |
| 154 | Subject instructors (HS/college)                       |
| 155 | Kindergarten and earlier school teachers               |
| 156 | Primary school teachers                                |
| 157 | Secondary school teachers                              |
| 158 | Special education teachers                             |
| 159 | Teachers , n.e.c.                                      |
| 163 | Vocational and educational counselors                  |
| 164 | Librarians                                             |
| 165 | Archivists and curators                                |
| 166 | Economists, market researchers, and survey researchers |
| 167 | Psychologists                                          |
| 168 | Sociologists                                           |
| 169 | Social scientists, n.e.c.                              |
| 173 | Urban and regional planners                            |
| 174 | Social workers                                         |
| 175 | Recreation workers                                     |
| 176 | Clergy and religious workers                           |
| 178 | Lawyers                                                |

|     |                                                                  |
|-----|------------------------------------------------------------------|
| 179 | Judges                                                           |
| 183 | Writers and authors                                              |
| 184 | Technical writers                                                |
| 185 | Designers                                                        |
| 186 | Musician or composer                                             |
| 187 | Actors, directors, producers                                     |
| 188 | Art makers: painters, sculptors, craft-artists, and print-makers |
| 189 | Photographers                                                    |
| 193 | Dancers                                                          |
| 194 | Art/entertainment performers and related                         |
| 195 | Editors and reporters                                            |
| 198 | Announcers                                                       |
| 199 | Athletes, sports instructors, and officials                      |
| 200 | Professionals, n.e.c.                                            |
| 203 | Clinical laboratory technologies and technicians                 |
| 204 | Dental hygienists                                                |
| 205 | Health record tech specialists                                   |
| 206 | Radiologic tech specialists                                      |
| 207 | Licensed practical nurses                                        |
| 208 | Health technologists and technicians, n.e.c.                     |
| 213 | Electrical and electronic (engineering) technicians              |
| 214 | Engineering technicians, n.e.c.                                  |
| 215 | Mechanical engineering technicians                               |
| 217 | Drafters                                                         |

|     |                                                              |
|-----|--------------------------------------------------------------|
| 218 | Surveyors, cartographers, mapping scientists and technicians |
| 223 | Biological technicians                                       |
| 224 | Chemical technicians                                         |
| 225 | Other science technicians                                    |
| 226 | Airplane pilots and navigators                               |
| 227 | Air traffic controllers                                      |
| 228 | Broadcast equipment operators                                |
| 229 | Computer software developers                                 |
| 233 | Programmers of numerically controlled machine tools          |
| 234 | Legal assistants, paralegals, legal support, etc             |
| 235 | Technicians, n.e.c.                                          |
| 243 | Supervisors and proprietors of sales jobs                    |
| 253 | Insurance sales occupations                                  |
| 254 | Real estate sales occupations                                |
| 255 | Financial services sales occupations                         |
| 256 | Advertising and related sales jobs                           |
| 258 | Sales engineers                                              |
| 274 | Salespersons, n.e.c.                                         |
| 275 | Retail sales clerks                                          |
| 276 | Cashiers                                                     |
| 277 | Door-to-door sales, street sales, and news vendors           |
| 283 | Sales demonstrators / promoters / models                     |
| 290 | Sales workers--allocated (1990 internal census)              |
| 303 | Office supervisors                                           |

|     |                                                          |
|-----|----------------------------------------------------------|
| 308 | Computer and peripheral equipment operators              |
| 313 | Secretaries                                              |
| 314 | Stenographers                                            |
| 315 | Typists                                                  |
| 316 | Interviewers, enumerators, and surveyors                 |
| 317 | Hotel clerks                                             |
| 318 | Transportation ticket and reservation agents             |
| 319 | Receptionists                                            |
| 323 | Information clerks, nec                                  |
| 326 | Correspondence and order clerks                          |
| 328 | Human resources clerks, except payroll and timekeeping   |
| 329 | Library assistants                                       |
| 335 | File clerks                                              |
| 336 | Records clerks                                           |
| 337 | Bookkeepers and accounting and auditing clerks           |
| 338 | Payroll and timekeeping clerks                           |
| 343 | Cost and rate clerks (financial records processing)      |
| 344 | Billing clerks and related financial records processing  |
| 345 | Duplication machine operators / office machine operators |
| 346 | Mail and paper handlers                                  |
| 347 | Office machine operators, n.e.c.                         |
| 348 | Telephone operators                                      |
| 349 | Other telecom operators                                  |
| 354 | Postal clerks, excluding mail carriers                   |

|     |                                                                                |
|-----|--------------------------------------------------------------------------------|
| 355 | Mail carriers for postal service                                               |
| 356 | Mail clerks, outside of post office                                            |
| 357 | Messengers                                                                     |
| 359 | Dispatchers                                                                    |
| 361 | Inspectors, n.e.c.                                                             |
| 364 | Shipping and receiving clerks                                                  |
| 365 | Stock and inventory clerks                                                     |
| 366 | Meter readers                                                                  |
| 368 | Weighers, measurers, and checkers                                              |
| 373 | Material recording, scheduling, production, planning, and expediting clerks    |
| 375 | Insurance adjusters, examiners, and investigators                              |
| 376 | Customer service reps, investigators and adjusters, except insurance           |
| 377 | Eligibility clerks for government programs; social welfare                     |
| 378 | Bill and account collectors                                                    |
| 379 | General office clerks                                                          |
| 383 | Bank tellers                                                                   |
| 384 | Proofreaders                                                                   |
| 385 | Data entry keyers                                                              |
| 386 | Statistical clerks                                                             |
| 387 | Teacher's aides                                                                |
| 389 | Administrative support jobs, n.e.c.                                            |
| 390 | Professional, technical, and kindred workers--allocated (1990 internal census) |
| 391 | Clerical and kindred workers--allocated (1990 internal census)                 |
| 405 | Housekeepers, maids, butlers, stewards, and lodging quarters cleaners          |

|     |                                                                              |
|-----|------------------------------------------------------------------------------|
| 407 | Private household cleaners and servants                                      |
| 408 | Private household workers--allocated (1990 internal census)                  |
| 415 | Supervisors of guards                                                        |
| 417 | Fire fighting, prevention, and inspection                                    |
| 418 | Police, detectives, and private investigators                                |
| 423 | Other law enforcement: sheriffs, bailiffs, correctional institution officers |
| 425 | Crossing guards and bridge tenders                                           |
| 426 | Guards, watchmen, doorkeepers                                                |
| 427 | Protective services, n.e.c.                                                  |
| 434 | Bartenders                                                                   |
| 435 | Waiter/waitress                                                              |
| 436 | Cooks, variously defined                                                     |
| 438 | Food counter and fountain workers                                            |
| 439 | Kitchen workers                                                              |
| 443 | Waiter's assistant                                                           |
| 444 | Misc food prep workers                                                       |
| 445 | Dental assistants                                                            |
| 446 | Health aides, except nursing                                                 |
| 447 | Nursing aides, orderlies, and attendants                                     |
| 448 | Supervisors of cleaning and building service                                 |
| 453 | Janitors                                                                     |
| 454 | Elevator operators                                                           |
| 455 | Pest control occupations                                                     |
| 456 | Supervisors of personal service jobs, n.e.c.                                 |

|     |                                                                  |
|-----|------------------------------------------------------------------|
| 457 | Barbers                                                          |
| 458 | Hairdressers and cosmetologists                                  |
| 459 | Recreation facility attendants                                   |
| 461 | Guides                                                           |
| 462 | Ushers                                                           |
| 463 | Public transportation attendants and inspectors                  |
| 464 | Baggage porters                                                  |
| 465 | Welfare service aides                                            |
| 468 | Child care workers                                               |
| 469 | Personal service occupations, nec                                |
| 473 | Farmers (owners and tenants)                                     |
| 474 | Horticultural specialty farmers                                  |
| 475 | Farm managers, except for horticultural farms                    |
| 476 | Managers of horticultural specialty farms                        |
| 479 | Farm workers                                                     |
| 480 | Farm laborers and farm foreman--allocated (1990 internal census) |
| 483 | Marine life cultivation workers                                  |
| 484 | Nursery farming workers                                          |
| 485 | Supervisors of agricultural occupations                          |
| 486 | Gardeners and groundskeepers                                     |
| 487 | Animal caretakers except on farms                                |
| 488 | Graders and sorters of agricultural products                     |
| 489 | Inspectors of agricultural products                              |
| 496 | Timber, logging, and forestry workers                            |

|     |                                                        |
|-----|--------------------------------------------------------|
| 498 | Fishers, hunters, and kindred                          |
| 503 | Supervisors of mechanics and repairers                 |
| 505 | Automobile mechanics                                   |
| 507 | Bus, truck, and stationary engine mechanics            |
| 508 | Aircraft mechanics                                     |
| 509 | Small engine repairers                                 |
| 514 | Auto body repairers                                    |
| 516 | Heavy equipment and farm equipment mechanics           |
| 518 | Industrial machinery repairers                         |
| 519 | Machinery maintenance occupations                      |
| 523 | Repairers of industrial electrical equipment           |
| 525 | Repairers of data processing equipment                 |
| 526 | Repairers of household appliances and power tools      |
| 527 | Telecom and line installers and repairers              |
| 533 | Repairers of electrical equipment, n.e.c.              |
| 534 | Heating, air conditioning, and refrigeration mechanics |
| 535 | Precision makers, repairers, and smiths                |
| 536 | Locksmiths and safe repairers                          |
| 538 | Office machine repairers and mechanics                 |
| 539 | Repairers of mechanical controls and valves            |
| 543 | Elevator installers and repairers                      |
| 544 | Millwrights                                            |
| 549 | Mechanics and repairers, n.e.c.                        |
| 558 | Supervisors of construction work                       |



|     |                                                    |
|-----|----------------------------------------------------|
| 563 | Masons, tilers, and carpet installers              |
| 567 | Carpenters                                         |
| 573 | Drywall installers                                 |
| 575 | Electricians                                       |
| 577 | Electric power installers and repairers            |
| 579 | Painters, construction and maintenance             |
| 583 | Paperhangers                                       |
| 584 | Plasterers                                         |
| 585 | Plumbers, pipe fitters, and steamfitters           |
| 588 | Concrete and cement workers                        |
| 589 | Glaziers                                           |
| 593 | Insulation workers                                 |
| 594 | Paving, surfacing, and tamping equipment operators |
| 595 | Roofers and slaters                                |
| 596 | Sheet metal duct installers                        |
| 597 | Structural metal workers                           |
| 598 | Drillers of earth                                  |
| 599 | Construction trades, n.e.c.                        |
| 614 | Drillers of oil wells                              |
| 615 | Explosives workers                                 |
| 616 | Miners                                             |
| 617 | Other mining occupations                           |
| 628 | Production supervisors or foremen                  |
| 634 | Tool and die makers and die setters                |

|     |                                                     |
|-----|-----------------------------------------------------|
| 637 | Machinists                                          |
| 643 | Boilermakers                                        |
| 644 | Precision grinders and filers                       |
| 645 | Patternmakers and model makers                      |
| 646 | Lay-out workers                                     |
| 649 | Engravers                                           |
| 653 | Tinsmiths, coppersmiths, and sheet metal workers    |
| 657 | Cabinetmakers and bench carpenters                  |
| 658 | Furniture and wood finishers                        |
| 659 | Other precision woodworkers                         |
| 666 | Dressmakers and seamstresses                        |
| 667 | Tailors                                             |
| 668 | Upholsterers                                        |
| 669 | Shoe repairers                                      |
| 674 | Other precision apparel and fabric workers          |
| 675 | Hand molders and shapers, except jewelers           |
| 677 | Optical goods workers                               |
| 678 | Dental laboratory and medical appliance technicians |
| 679 | Bookbinders                                         |
| 684 | Other precision and craft workers                   |
| 686 | Butchers and meat cutters                           |
| 687 | Bakers                                              |
| 688 | Batch food makers                                   |
| 693 | Adjusters and calibrators                           |

|     |                                                    |
|-----|----------------------------------------------------|
| 694 | Water and sewage treatment plant operators         |
| 695 | Power plant operators                              |
| 696 | Plant and system operators, stationary engineers   |
| 699 | Other plant and system operators                   |
| 703 | Lathe, milling, and turning machine operatives     |
| 706 | Punching and stamping press operatives             |
| 707 | Rollers, roll hands, and finishers of metal        |
| 708 | Drilling and boring machine operators              |
| 709 | Grinding, abrading, buffing, and polishing workers |
| 713 | Forge and hammer operators                         |
| 717 | Fabricating machine operators, n.e.c.              |
| 719 | Molders, and casting machine operators             |
| 723 | Metal platers                                      |
| 724 | Heat treating equipment operators                  |
| 726 | Wood lathe, routing, and planing machine operators |
| 727 | Sawing machine operators and sawyers               |
| 728 | Shaping and joining machine operator (woodworking) |
| 729 | Nail and tacking machine operators (woodworking)   |
| 733 | Other woodworking machine operators                |
| 734 | Printing machine operators, n.e.c.                 |
| 735 | Photoengravers and lithographers                   |
| 736 | Typesetters and compositors                        |
| 738 | Winding and twisting textile/apparel operatives    |
| 739 | Knitters, loopers, and toppers textile operatives  |

|     |                                                         |
|-----|---------------------------------------------------------|
| 743 | Textile cutting machine operators                       |
| 744 | Textile sewing machine operators                        |
| 745 | Shoemaking machine operators                            |
| 747 | Pressing machine operators (clothing)                   |
| 748 | Laundry workers                                         |
| 749 | Misc textile machine operators                          |
| 753 | Cementing and gluing maching operators                  |
| 754 | Packers, fillers, and wrappers                          |
| 755 | Extruding and forming machine operators                 |
| 756 | Mixing and blending machine operatives                  |
| 757 | Separating, filtering, and clarifying machine operators |
| 759 | Painting machine operators                              |
| 763 | Roasting and baking machine operators (food)            |
| 764 | Washing, cleaning, and pickling machine operators       |
| 765 | Paper folding machine operators                         |
| 766 | Furnace, kiln, and oven operators, apart from food      |
| 768 | Crushing and grinding machine operators                 |
| 769 | Slicing and cutting machine operators                   |
| 773 | Motion picture projectionists                           |
| 774 | Photographic process workers                            |
| 779 | Machine operators, n.e.c.                               |
| 783 | Welders and metal cutters                               |
| 784 | Solderers                                               |
| 785 | Assemblers of electrical equipment                      |

|     |                                                                  |
|-----|------------------------------------------------------------------|
| 789 | Hand painting, coating, and decorating occupations               |
| 796 | Production checkers and inspectors                               |
| 799 | Graders and sorters in manufacturing                             |
| 803 | Supervisors of motor vehicle transportation                      |
| 804 | Truck, delivery, and tractor drivers                             |
| 808 | Bus drivers                                                      |
| 809 | Taxi cab drivers and chauffeurs                                  |
| 813 | Parking lot attendants                                           |
| 815 | Transport equipment operatives--allocated (1990 internal census) |
| 823 | Railroad conductors and yardmasters                              |
| 824 | Locomotive operators (engineers and firemen)                     |
| 825 | Railroad brake, coupler, and switch operators                    |
| 829 | Ship crews and marine engineers                                  |
| 834 | Water transport infrastructure tenders and crossing guards       |
| 844 | Operating engineers of construction equipment                    |
| 848 | Crane, derrick, winch, and hoist operators                       |
| 853 | Excavating and loading machine operators                         |
| 859 | Misc material moving occupations                                 |
| 865 | Helpers, constructions                                           |
| 866 | Helpers, surveyors                                               |
| 869 | Construction laborers                                            |
| 874 | Production helpers                                               |
| 875 | Garbage and recyclable material collectors                       |
| 876 | Materials movers: stevedores and longshore workers               |

|     |                                                         |
|-----|---------------------------------------------------------|
| 877 | Stock handlers                                          |
| 878 | Machine feeders and offbearers                          |
| 883 | Freight, stock, and materials handlers                  |
| 885 | Garage and service station related occupations          |
| 887 | Vehicle washers and equipment cleaners                  |
| 888 | Packers and packagers by hand                           |
| 889 | Laborers outside construction                           |
| 890 | Laborers, except farm--allocated (1990 internal census) |
| 905 | Military                                                |
| 991 | Unemployed                                              |
| 999 | Unknown                                                 |

### Variable: "IND1990"

|                 |                                                                                                                                                                                                                                                                                                                                                                                                                                                                                                                              |
|-----------------|------------------------------------------------------------------------------------------------------------------------------------------------------------------------------------------------------------------------------------------------------------------------------------------------------------------------------------------------------------------------------------------------------------------------------------------------------------------------------------------------------------------------------|
| Name:           | IND1990                                                                                                                                                                                                                                                                                                                                                                                                                                                                                                                      |
| Label:          | Industry, 1990 basis                                                                                                                                                                                                                                                                                                                                                                                                                                                                                                         |
| Variable Text:  | <p>IND1990 recodes information contained in the variable IND into the 1990 Census Bureau industrial classification system. Developed to enhance the comparability of industry data in historical U.S. census samples in IPUMS-USA, IND1990 also provides a consistent set of industry codes for IPUMS-CPS from 1968 forward.</p> <p>For general discussion of the IND1990 variable, users should consult the IPUMS-USA documentation. For discussion of the CPS data on industry that are recoded into IND1990, see IND.</p> |
| Concept:        | Work Variables -- PERSON                                                                                                                                                                                                                                                                                                                                                                                                                                                                                                     |
| Start Position: | 134                                                                                                                                                                                                                                                                                                                                                                                                                                                                                                                          |
| End Position:   | 136                                                                                                                                                                                                                                                                                                                                                                                                                                                                                                                          |
| Width:          | 3                                                                                                                                                                                                                                                                                                                                                                                                                                                                                                                            |

| Variable Format:                                                                                                                                                                                                                                                                                                                                                                                                                                                                                                                                                                                                                                                                                                                                                                                                                                                                                                                                                                                                                                                                                                                                                   | numeric                                             |       |       |     |     |     |                                |     |                                    |     |                     |     |                                      |     |                               |     |          |     |                                |     |              |     |             |     |                        |     |                                                |     |                  |     |               |     |                |     |                                                     |     |                     |     |                 |
|--------------------------------------------------------------------------------------------------------------------------------------------------------------------------------------------------------------------------------------------------------------------------------------------------------------------------------------------------------------------------------------------------------------------------------------------------------------------------------------------------------------------------------------------------------------------------------------------------------------------------------------------------------------------------------------------------------------------------------------------------------------------------------------------------------------------------------------------------------------------------------------------------------------------------------------------------------------------------------------------------------------------------------------------------------------------------------------------------------------------------------------------------------------------|-----------------------------------------------------|-------|-------|-----|-----|-----|--------------------------------|-----|------------------------------------|-----|---------------------|-----|--------------------------------------|-----|-------------------------------|-----|----------|-----|--------------------------------|-----|--------------|-----|-------------|-----|------------------------|-----|------------------------------------------------|-----|------------------|-----|---------------|-----|----------------|-----|-----------------------------------------------------|-----|---------------------|-----|-----------------|
| Implied Decimal Places:                                                                                                                                                                                                                                                                                                                                                                                                                                                                                                                                                                                                                                                                                                                                                                                                                                                                                                                                                                                                                                                                                                                                            | 0                                                   |       |       |     |     |     |                                |     |                                    |     |                     |     |                                      |     |                               |     |          |     |                                |     |              |     |             |     |                        |     |                                                |     |                  |     |               |     |                |     |                                                     |     |                     |     |                 |
| <b>Categories</b>                                                                                                                                                                                                                                                                                                                                                                                                                                                                                                                                                                                                                                                                                                                                                                                                                                                                                                                                                                                                                                                                                                                                                  |                                                     |       |       |     |     |     |                                |     |                                    |     |                     |     |                                      |     |                               |     |          |     |                                |     |              |     |             |     |                        |     |                                                |     |                  |     |               |     |                |     |                                                     |     |                     |     |                 |
| <table border="1"> <thead> <tr> <th>Value</th> <th>Label</th> </tr> </thead> <tbody> <tr> <td>000</td> <td>NIU</td> </tr> <tr> <td>010</td> <td>Agricultural production, crops</td> </tr> <tr> <td>011</td> <td>Agricultural production, livestock</td> </tr> <tr> <td>012</td> <td>Veterinary services</td> </tr> <tr> <td>020</td> <td>Landscape and horticultural services</td> </tr> <tr> <td>030</td> <td>Agricultural services, n.e.c.</td> </tr> <tr> <td>031</td> <td>Forestry</td> </tr> <tr> <td>032</td> <td>Fishing, hunting, and trapping</td> </tr> <tr> <td>040</td> <td>Metal mining</td> </tr> <tr> <td>041</td> <td>Coal mining</td> </tr> <tr> <td>042</td> <td>Oil and gas extraction</td> </tr> <tr> <td>050</td> <td>Nonmetallic mining and quarrying, except fuels</td> </tr> <tr> <td>060</td> <td>All construction</td> </tr> <tr> <td>100</td> <td>Meat products</td> </tr> <tr> <td>101</td> <td>Dairy products</td> </tr> <tr> <td>102</td> <td>Canned, frozen, and preserved fruits and vegetables</td> </tr> <tr> <td>110</td> <td>Grain mill products</td> </tr> <tr> <td>111</td> <td>Bakery products</td> </tr> </tbody> </table> |                                                     | Value | Label | 000 | NIU | 010 | Agricultural production, crops | 011 | Agricultural production, livestock | 012 | Veterinary services | 020 | Landscape and horticultural services | 030 | Agricultural services, n.e.c. | 031 | Forestry | 032 | Fishing, hunting, and trapping | 040 | Metal mining | 041 | Coal mining | 042 | Oil and gas extraction | 050 | Nonmetallic mining and quarrying, except fuels | 060 | All construction | 100 | Meat products | 101 | Dairy products | 102 | Canned, frozen, and preserved fruits and vegetables | 110 | Grain mill products | 111 | Bakery products |
| Value                                                                                                                                                                                                                                                                                                                                                                                                                                                                                                                                                                                                                                                                                                                                                                                                                                                                                                                                                                                                                                                                                                                                                              | Label                                               |       |       |     |     |     |                                |     |                                    |     |                     |     |                                      |     |                               |     |          |     |                                |     |              |     |             |     |                        |     |                                                |     |                  |     |               |     |                |     |                                                     |     |                     |     |                 |
| 000                                                                                                                                                                                                                                                                                                                                                                                                                                                                                                                                                                                                                                                                                                                                                                                                                                                                                                                                                                                                                                                                                                                                                                | NIU                                                 |       |       |     |     |     |                                |     |                                    |     |                     |     |                                      |     |                               |     |          |     |                                |     |              |     |             |     |                        |     |                                                |     |                  |     |               |     |                |     |                                                     |     |                     |     |                 |
| 010                                                                                                                                                                                                                                                                                                                                                                                                                                                                                                                                                                                                                                                                                                                                                                                                                                                                                                                                                                                                                                                                                                                                                                | Agricultural production, crops                      |       |       |     |     |     |                                |     |                                    |     |                     |     |                                      |     |                               |     |          |     |                                |     |              |     |             |     |                        |     |                                                |     |                  |     |               |     |                |     |                                                     |     |                     |     |                 |
| 011                                                                                                                                                                                                                                                                                                                                                                                                                                                                                                                                                                                                                                                                                                                                                                                                                                                                                                                                                                                                                                                                                                                                                                | Agricultural production, livestock                  |       |       |     |     |     |                                |     |                                    |     |                     |     |                                      |     |                               |     |          |     |                                |     |              |     |             |     |                        |     |                                                |     |                  |     |               |     |                |     |                                                     |     |                     |     |                 |
| 012                                                                                                                                                                                                                                                                                                                                                                                                                                                                                                                                                                                                                                                                                                                                                                                                                                                                                                                                                                                                                                                                                                                                                                | Veterinary services                                 |       |       |     |     |     |                                |     |                                    |     |                     |     |                                      |     |                               |     |          |     |                                |     |              |     |             |     |                        |     |                                                |     |                  |     |               |     |                |     |                                                     |     |                     |     |                 |
| 020                                                                                                                                                                                                                                                                                                                                                                                                                                                                                                                                                                                                                                                                                                                                                                                                                                                                                                                                                                                                                                                                                                                                                                | Landscape and horticultural services                |       |       |     |     |     |                                |     |                                    |     |                     |     |                                      |     |                               |     |          |     |                                |     |              |     |             |     |                        |     |                                                |     |                  |     |               |     |                |     |                                                     |     |                     |     |                 |
| 030                                                                                                                                                                                                                                                                                                                                                                                                                                                                                                                                                                                                                                                                                                                                                                                                                                                                                                                                                                                                                                                                                                                                                                | Agricultural services, n.e.c.                       |       |       |     |     |     |                                |     |                                    |     |                     |     |                                      |     |                               |     |          |     |                                |     |              |     |             |     |                        |     |                                                |     |                  |     |               |     |                |     |                                                     |     |                     |     |                 |
| 031                                                                                                                                                                                                                                                                                                                                                                                                                                                                                                                                                                                                                                                                                                                                                                                                                                                                                                                                                                                                                                                                                                                                                                | Forestry                                            |       |       |     |     |     |                                |     |                                    |     |                     |     |                                      |     |                               |     |          |     |                                |     |              |     |             |     |                        |     |                                                |     |                  |     |               |     |                |     |                                                     |     |                     |     |                 |
| 032                                                                                                                                                                                                                                                                                                                                                                                                                                                                                                                                                                                                                                                                                                                                                                                                                                                                                                                                                                                                                                                                                                                                                                | Fishing, hunting, and trapping                      |       |       |     |     |     |                                |     |                                    |     |                     |     |                                      |     |                               |     |          |     |                                |     |              |     |             |     |                        |     |                                                |     |                  |     |               |     |                |     |                                                     |     |                     |     |                 |
| 040                                                                                                                                                                                                                                                                                                                                                                                                                                                                                                                                                                                                                                                                                                                                                                                                                                                                                                                                                                                                                                                                                                                                                                | Metal mining                                        |       |       |     |     |     |                                |     |                                    |     |                     |     |                                      |     |                               |     |          |     |                                |     |              |     |             |     |                        |     |                                                |     |                  |     |               |     |                |     |                                                     |     |                     |     |                 |
| 041                                                                                                                                                                                                                                                                                                                                                                                                                                                                                                                                                                                                                                                                                                                                                                                                                                                                                                                                                                                                                                                                                                                                                                | Coal mining                                         |       |       |     |     |     |                                |     |                                    |     |                     |     |                                      |     |                               |     |          |     |                                |     |              |     |             |     |                        |     |                                                |     |                  |     |               |     |                |     |                                                     |     |                     |     |                 |
| 042                                                                                                                                                                                                                                                                                                                                                                                                                                                                                                                                                                                                                                                                                                                                                                                                                                                                                                                                                                                                                                                                                                                                                                | Oil and gas extraction                              |       |       |     |     |     |                                |     |                                    |     |                     |     |                                      |     |                               |     |          |     |                                |     |              |     |             |     |                        |     |                                                |     |                  |     |               |     |                |     |                                                     |     |                     |     |                 |
| 050                                                                                                                                                                                                                                                                                                                                                                                                                                                                                                                                                                                                                                                                                                                                                                                                                                                                                                                                                                                                                                                                                                                                                                | Nonmetallic mining and quarrying, except fuels      |       |       |     |     |     |                                |     |                                    |     |                     |     |                                      |     |                               |     |          |     |                                |     |              |     |             |     |                        |     |                                                |     |                  |     |               |     |                |     |                                                     |     |                     |     |                 |
| 060                                                                                                                                                                                                                                                                                                                                                                                                                                                                                                                                                                                                                                                                                                                                                                                                                                                                                                                                                                                                                                                                                                                                                                | All construction                                    |       |       |     |     |     |                                |     |                                    |     |                     |     |                                      |     |                               |     |          |     |                                |     |              |     |             |     |                        |     |                                                |     |                  |     |               |     |                |     |                                                     |     |                     |     |                 |
| 100                                                                                                                                                                                                                                                                                                                                                                                                                                                                                                                                                                                                                                                                                                                                                                                                                                                                                                                                                                                                                                                                                                                                                                | Meat products                                       |       |       |     |     |     |                                |     |                                    |     |                     |     |                                      |     |                               |     |          |     |                                |     |              |     |             |     |                        |     |                                                |     |                  |     |               |     |                |     |                                                     |     |                     |     |                 |
| 101                                                                                                                                                                                                                                                                                                                                                                                                                                                                                                                                                                                                                                                                                                                                                                                                                                                                                                                                                                                                                                                                                                                                                                | Dairy products                                      |       |       |     |     |     |                                |     |                                    |     |                     |     |                                      |     |                               |     |          |     |                                |     |              |     |             |     |                        |     |                                                |     |                  |     |               |     |                |     |                                                     |     |                     |     |                 |
| 102                                                                                                                                                                                                                                                                                                                                                                                                                                                                                                                                                                                                                                                                                                                                                                                                                                                                                                                                                                                                                                                                                                                                                                | Canned, frozen, and preserved fruits and vegetables |       |       |     |     |     |                                |     |                                    |     |                     |     |                                      |     |                               |     |          |     |                                |     |              |     |             |     |                        |     |                                                |     |                  |     |               |     |                |     |                                                     |     |                     |     |                 |
| 110                                                                                                                                                                                                                                                                                                                                                                                                                                                                                                                                                                                                                                                                                                                                                                                                                                                                                                                                                                                                                                                                                                                                                                | Grain mill products                                 |       |       |     |     |     |                                |     |                                    |     |                     |     |                                      |     |                               |     |          |     |                                |     |              |     |             |     |                        |     |                                                |     |                  |     |               |     |                |     |                                                     |     |                     |     |                 |
| 111                                                                                                                                                                                                                                                                                                                                                                                                                                                                                                                                                                                                                                                                                                                                                                                                                                                                                                                                                                                                                                                                                                                                                                | Bakery products                                     |       |       |     |     |     |                                |     |                                    |     |                     |     |                                      |     |                               |     |          |     |                                |     |              |     |             |     |                        |     |                                                |     |                  |     |               |     |                |     |                                                     |     |                     |     |                 |

|     |                                                                |
|-----|----------------------------------------------------------------|
| 112 | Sugar and confectionery products                               |
| 120 | Beverage industries                                            |
| 121 | Misc. food preparations and kindred products                   |
| 122 | Food industries, n.s.                                          |
| 130 | Tobacco manufactures                                           |
| 132 | Knitting mills                                                 |
| 140 | Dyeing and finishing textiles, except wool and knit goods      |
| 141 | Carpets and rugs                                               |
| 142 | Yarn, thread, and fabric mills                                 |
| 150 | Miscellaneous textile mill products                            |
| 151 | Apparel and accessories, except knit                           |
| 152 | Miscellaneous fabricated textile products                      |
| 160 | Pulp, paper, and paperboard mills                              |
| 161 | Miscellaneous paper and pulp products                          |
| 162 | Paperboard containers and boxes                                |
| 171 | Newspaper publishing and printing                              |
| 172 | Printing, publishing, and allied industries, except newspapers |
| 180 | Plastics, synthetics, and resins                               |
| 181 | Drugs                                                          |
| 182 | Soaps and cosmetics                                            |
| 190 | Paints, varnishes, and related products                        |
| 191 | Agricultural chemicals                                         |
| 192 | Industrial and miscellaneous chemicals                         |
| 200 | Petroleum refining                                             |



|     |                                                          |
|-----|----------------------------------------------------------|
| 201 | Miscellaneous petroleum and coal products                |
| 210 | Tires and inner tubes                                    |
| 211 | Other rubber products, and plastics footwear and belting |
| 212 | Miscellaneous plastics products                          |
| 220 | Leather tanning and finishing                            |
| 221 | Footwear, except rubber and plastic                      |
| 222 | Leather products, except footwear                        |
| 229 | Manufacturing, non-durable - allocated                   |
| 230 | Logging                                                  |
| 231 | Sawmills, planing mills, and millwork                    |
| 232 | Wood buildings and mobile homes                          |
| 241 | Miscellaneous wood products                              |
| 242 | Furniture and fixtures                                   |
| 250 | Glass and glass products                                 |
| 251 | Cement, concrete, gypsum, and plaster products           |
| 252 | Structural clay products                                 |
| 261 | Pottery and related products                             |
| 262 | Misc. nonmetallic mineral and stone products             |
| 270 | Blast furnaces, steelworks, rolling and finishing mills  |
| 271 | Iron and steel foundries                                 |
| 272 | Primary aluminum industries                              |
| 280 | Other primary metal industries                           |
| 281 | Cutlery, handtools, and general hardware                 |
| 282 | Fabricated structural metal products                     |

|     |                                                       |
|-----|-------------------------------------------------------|
| 290 | Screw machine products                                |
| 291 | Metal forgings and stampings                          |
| 292 | Ordnance                                              |
| 300 | Miscellaneous fabricated metal products               |
| 301 | Metal industries, n.s.                                |
| 310 | Engines and turbines                                  |
| 311 | Farm machinery and equipment                          |
| 312 | Construction and material handling machines           |
| 320 | Metalworking machinery                                |
| 321 | Office and accounting machines                        |
| 322 | Computers and related equipment                       |
| 331 | Machinery, except electrical, n.e.c.                  |
| 332 | Machinery, n.s.                                       |
| 340 | Household appliances                                  |
| 341 | Radio, TV, and communication equipment                |
| 342 | Electrical machinery, equipment, and supplies, n.e.c. |
| 350 | Electrical machinery, equipment, and supplies, n.s.   |
| 351 | Motor vehicles and motor vehicle equipment            |
| 352 | Aircraft and parts                                    |
| 360 | Ship and boat building and repairing                  |
| 361 | Railroad locomotives and equipment                    |
| 362 | Guided missiles, space vehicles, and parts            |
| 370 | Cycles and miscellaneous transportation equipment     |
| 371 | Scientific and controlling instruments                |

|     |                                                       |
|-----|-------------------------------------------------------|
| 372 | Medical, dental, and optical instruments and supplies |
| 380 | Photographic equipment and supplies                   |
| 381 | Watches, clocks, and clockwork operated devices       |
| 390 | Toys, amusement, and sporting goods                   |
| 391 | Miscellaneous manufacturing industries                |
| 392 | Manufacturing industries, n.s.                        |
| 400 | Railroads                                             |
| 401 | Bus service and urban transit                         |
| 402 | Taxicab service                                       |
| 410 | Trucking service                                      |
| 411 | Warehousing and storage                               |
| 412 | U.S. Postal Service                                   |
| 420 | Water transportation                                  |
| 421 | Air transportation                                    |
| 422 | Pipe lines, except natural gas                        |
| 432 | Services incidental to transportation                 |
| 440 | Radio and television broadcasting and cable           |
| 441 | Wired communications                                  |
| 442 | Telegraph and miscellaneous communications services   |
| 450 | Electric light and power                              |
| 451 | Gas and steam supply systems                          |
| 452 | Electric and gas, and other combinations              |
| 470 | Water supply and irrigation                           |
| 471 | Sanitary services                                     |

|     |                                                    |
|-----|----------------------------------------------------|
| 472 | Utilities, n.s.                                    |
| 500 | Motor vehicles and equipment                       |
| 501 | Furniture and home furnishings                     |
| 502 | Lumber and construction materials                  |
| 510 | Professional and commercial equipment and supplies |
| 511 | Metals and minerals, except petroleum              |
| 512 | Electrical goods                                   |
| 521 | Hardware, plumbing and heating supplies            |
| 530 | Machinery, equipment, and supplies                 |
| 531 | Scrap and waste materials                          |
| 532 | Miscellaneous wholesale, durable goods             |
| 540 | Paper and paper products                           |
| 541 | Drugs, chemicals, and allied products              |
| 542 | Apparel, fabrics, and notions                      |
| 550 | Groceries and related products                     |
| 551 | Farm-product raw materials                         |
| 552 | Petroleum products                                 |
| 560 | Alcoholic beverages                                |
| 561 | Farm supplies                                      |
| 562 | Miscellaneous wholesale, nondurable goods          |
| 571 | Wholesale trade, n.s.                              |
| 580 | Lumber and building material retailing             |
| 581 | Hardware stores                                    |
| 582 | Retail nurseries and garden stores                 |

|     |                                            |
|-----|--------------------------------------------|
| 590 | Mobile home dealers                        |
| 591 | Department stores                          |
| 592 | Variety stores                             |
| 600 | Miscellaneous general merchandise stores   |
| 601 | Grocery stores                             |
| 602 | Dairy products stores                      |
| 610 | Retail bakeries                            |
| 611 | Food stores, n.e.c.                        |
| 612 | Motor vehicle dealers                      |
| 620 | Auto and home supply stores                |
| 621 | Gasoline service stations                  |
| 622 | Miscellaneous vehicle dealers              |
| 623 | Apparel and accessory stores, except shoe  |
| 630 | Shoe stores                                |
| 631 | Furniture and home furnishings stores      |
| 632 | Household appliance stores                 |
| 633 | Radio, TV, and computer stores             |
| 640 | Music stores                               |
| 641 | Eating and drinking places                 |
| 642 | Drug stores                                |
| 650 | Liquor stores                              |
| 651 | Sporting goods, bicycles, and hobby stores |
| 652 | Book and stationery stores                 |
| 660 | Jewelry stores                             |

|     |                                                         |
|-----|---------------------------------------------------------|
| 661 | Gift, novelty, and souvenir shops                       |
| 662 | Sewing, needlework, and piece goods stores              |
| 663 | Catalog and mail order houses                           |
| 670 | Vending machine operators                               |
| 671 | Direct selling establishments                           |
| 672 | Fuel dealers                                            |
| 681 | Retail florists                                         |
| 682 | Miscellaneous retail stores                             |
| 691 | Retail trade, n.s.                                      |
| 700 | Banking                                                 |
| 701 | Savings institutions, including credit unions           |
| 702 | Credit agencies, n.e.c.                                 |
| 710 | Security, commodity brokerage, and investment companies |
| 711 | Insurance                                               |
| 712 | Real estate, including real estate-insurance offices    |
| 721 | Advertising                                             |
| 722 | Services to dwellings and other buildings               |
| 731 | Personnel supply services                               |
| 732 | Computer and data processing services                   |
| 740 | Detective and protective services                       |
| 741 | Business services, n.e.c.                               |
| 742 | Automotive rental and leasing, without drivers          |
| 750 | Automobile parking and carwashes                        |
| 751 | Automotive repair and related services                  |

|     |                                                     |
|-----|-----------------------------------------------------|
| 752 | Electrical repair shops                             |
| 760 | Miscellaneous repair services                       |
| 761 | Private households                                  |
| 762 | Hotels and motels                                   |
| 770 | Lodging places, except hotels and motels            |
| 771 | Laundry, cleaning, and garment services             |
| 772 | Beauty shops                                        |
| 780 | Barber shops                                        |
| 781 | Funeral service and crematories                     |
| 782 | Shoe repair shops                                   |
| 790 | Dressmaking shops                                   |
| 791 | Miscellaneous personal services                     |
| 800 | Theaters and motion pictures                        |
| 801 | Video tape rental                                   |
| 802 | Bowling centers                                     |
| 810 | Miscellaneous entertainment and recreation services |
| 812 | Offices and clinics of physicians                   |
| 820 | Offices and clinics of dentists                     |
| 821 | Offices and clinics of chiropractors                |
| 822 | Offices and clinics of optometrists                 |
| 830 | Offices and clinics of health practitioners, n.e.c. |
| 831 | Hospitals                                           |
| 832 | Nursing and personal care facilities                |
| 840 | Health services, n.e.c.                             |

|     |                                                     |
|-----|-----------------------------------------------------|
| 841 | Legal services                                      |
| 842 | Elementary and secondary schools                    |
| 850 | Colleges and universities                           |
| 851 | Vocational schools                                  |
| 852 | Libraries                                           |
| 860 | Educational services, n.e.c.                        |
| 861 | Job training and vocational rehabilitation services |
| 862 | Child day care services                             |
| 863 | Family child care homes                             |
| 870 | Residential care facilities, without nursing        |
| 871 | Social services, n.e.c.                             |
| 872 | Museums, art galleries, and zoos                    |
| 873 | Labor unions                                        |
| 880 | Religious organizations                             |
| 881 | Membership organizations, n.e.c.                    |
| 882 | Engineering, architectural, and surveying services  |
| 890 | Accounting, auditing, and bookkeeping services      |
| 891 | Research, development, and testing services         |
| 892 | Management and public relations services            |
| 893 | Miscellaneous professional and related services     |
| 900 | Executive and legislative offices                   |
| 901 | General government, n.e.c.                          |
| 910 | Justice, public order, and safety                   |
| 921 | Public finance, taxation, and monetary policy       |



|     |                                                              |
|-----|--------------------------------------------------------------|
| 922 | Administration of human resources programs                   |
| 930 | Administration of environmental quality and housing programs |
| 931 | Administration of economic programs                          |
| 932 | National security and international affairs                  |
| 940 | Army                                                         |
| 941 | Air Force                                                    |
| 942 | Navy                                                         |
| 950 | Marines                                                      |
| 951 | Coast Guard                                                  |
| 952 | Armed Forces, branch not specified                           |
| 960 | Military Reserves or National Guard                          |
| 998 | Unknown                                                      |

**Variable: "OCC1950"**

|                 |                                                                                                                                                                                                                                                                                                                                                                                                                                                                                                                                                        |
|-----------------|--------------------------------------------------------------------------------------------------------------------------------------------------------------------------------------------------------------------------------------------------------------------------------------------------------------------------------------------------------------------------------------------------------------------------------------------------------------------------------------------------------------------------------------------------------|
| Name:           | OCC1950                                                                                                                                                                                                                                                                                                                                                                                                                                                                                                                                                |
| Label:          | Occupation, 1950 basis                                                                                                                                                                                                                                                                                                                                                                                                                                                                                                                                 |
| Variable Text:  | <p>OCC1950 recodes information contained in the variable OCC into the 1950 Census Bureau occupational classification system. Developed to enhance the comparability of occupational data in historical U.S. census samples in IPUMS-USA, OCC1950 also provides a consistent set of occupational codes for IPUMS-CPS from 1968 forward.</p> <p>For general discussion of the OCC1950 variable, users should consult the IPUMS-USA documentation. For discussion of the CPS data on occupations that are recoded into OCC1950, see the OCC variable.</p> |
| Concept:        | Work Variables -- PERSON                                                                                                                                                                                                                                                                                                                                                                                                                                                                                                                               |
| Start Position: | 137                                                                                                                                                                                                                                                                                                                                                                                                                                                                                                                                                    |
| End Position:   | 139                                                                                                                                                                                                                                                                                                                                                                                                                                                                                                                                                    |
| Width:          | 3                                                                                                                                                                                                                                                                                                                                                                                                                                                                                                                                                      |

|                         |                                |
|-------------------------|--------------------------------|
| Variable Format:        | numeric                        |
| Implied Decimal Places: | 0                              |
| <b>Categories</b>       |                                |
| <b>Value</b>            | <b>Label</b>                   |
| 000                     | Accountants and auditors       |
| 001                     | Actors and actresses           |
| 002                     | Airplane pilots and navigators |
| 003                     | Architects                     |
| 004                     | Artists and art teachers       |
| 005                     | Athletes                       |
| 006                     | Authors                        |
| 007                     | Chemists                       |
| 008                     | Chiropractors                  |
| 009                     | Clergymen                      |
| 010                     | College presidents and deans   |
| 012                     | Agricultural sciences          |
| 013                     | Biological sciences            |
| 014                     | Chemistry                      |
| 015                     | Economics                      |
| 016                     | Engineering                    |
| 017                     | Geology and geophysics         |
| 018                     | Mathematics                    |

|     |                                         |
|-----|-----------------------------------------|
| 019 | Medical sciences                        |
| 023 | Physics                                 |
| 024 | Psychology                              |
| 025 | Statistics                              |
| 026 | Natural science (n.e.c.)                |
| 027 | Social sciences (n.e.c.)                |
| 028 | Nonscientific subjects                  |
| 029 | Subject not specified                   |
| 031 | Dancers and dancing teachers            |
| 032 | Dentists                                |
| 033 | Designers                               |
| 034 | Dieticians and nutritionists            |
| 035 | Draftsmen                               |
| 036 | Editors and reporters                   |
| 041 | Engineers, aeronautical                 |
| 042 | Engineers, chemical                     |
| 043 | Engineers, civil                        |
| 044 | Engineers, electrical                   |
| 045 | Engineers, industrial                   |
| 046 | Engineers, mechanical                   |
| 047 | Engineers, metallurgical, metallurgists |
| 048 | Engineers, mining                       |
| 049 | Engineers (n.e.c.)                      |
| 051 | Entertainers (n.e.c.)                   |

|     |                                          |
|-----|------------------------------------------|
| 052 | Farm and home management advisors        |
| 053 | Foresters and conservationists           |
| 054 | Funeral directors and embalmers          |
| 055 | Lawyers and judges                       |
| 056 | Librarians                               |
| 057 | Musicians and music teachers             |
| 058 | Nurses, professional                     |
| 059 | Nurses, student professional             |
| 061 | Agricultural scientists                  |
| 062 | Biological scientists                    |
| 063 | Geologists and geophysicists             |
| 067 | Mathematicians                           |
| 068 | Physicists                               |
| 069 | Miscellaneous natural scientists         |
| 070 | Optometrists                             |
| 071 | Osteopaths                               |
| 072 | Personnel and labor relations workers    |
| 073 | Pharmacists                              |
| 074 | Photographers                            |
| 075 | Physicians and surgeons                  |
| 076 | Radio operators                          |
| 077 | Recreation and group workers             |
| 078 | Religious workers                        |
| 079 | Social and welfare workers, except group |

|     |                                                              |
|-----|--------------------------------------------------------------|
| 081 | Economists                                                   |
| 082 | Psychologists                                                |
| 083 | Statisticians and actuaries                                  |
| 084 | Miscellaneous social scientists                              |
| 091 | Sports instructors and officials                             |
| 092 | Surveyors                                                    |
| 093 | Teachers (n.e.c.)                                            |
| 094 | Technicians, medical and dental                              |
| 095 | Technicians, testing                                         |
| 096 | Technicians (n.e.c.)                                         |
| 097 | Therapists and healers (n.e.c.)                              |
| 098 | Veterinarians                                                |
| 099 | Professional, technical and kindred workers (n.e.c.)         |
| 100 | Farmers (owners and tenants)                                 |
| 123 | Farm managers                                                |
| 200 | Buyers and department heads, store                           |
| 201 | Buyers and shippers, farm products                           |
| 203 | Conductors, railroad                                         |
| 204 | Credit men                                                   |
| 205 | Floormen and floor managers, store                           |
| 210 | Inspectors, public administration                            |
| 230 | Managers and superintendents, building                       |
| 240 | Officers, pilots, pursers and engineers, ship                |
| 250 | Officials and administrators (n.e.c.), public administration |

|     |                                               |
|-----|-----------------------------------------------|
| 260 | Officials, lodge, society, union, etc.        |
| 270 | Postmasters                                   |
| 280 | Purchasing agents and buyers (n.e.c.)         |
| 290 | Managers, officials, and proprietors (n.e.c.) |
| 300 | Agents (n.e.c.)                               |
| 301 | Attendants and assistants, library            |
| 302 | Attendants, physicians and dentists office    |
| 304 | Baggagemen, transportation                    |
| 305 | Bank tellers                                  |
| 310 | Bookkeepers                                   |
| 320 | Cashiers                                      |
| 321 | Collectors, bill and account                  |
| 322 | Dispatchers and starters, vehicle             |
| 325 | Express messengers and railway mail clerks    |
| 335 | Mail carriers                                 |
| 340 | Messengers and office boys                    |
| 341 | Office machine operators                      |
| 342 | Shipping and receiving clerks                 |
| 350 | Stenographers, typists, and secretaries       |
| 360 | Telegraph messengers                          |
| 365 | Telegraph operators                           |
| 370 | Telephone operators                           |
| 380 | Ticket, station, and express agents           |
| 390 | Clerical and kindred workers (n.e.c.)         |

|     |                                                   |
|-----|---------------------------------------------------|
| 400 | Advertising agents and salesmen                   |
| 410 | Auctioneers                                       |
| 420 | Demonstrators                                     |
| 430 | Hucksters and peddlers                            |
| 450 | Insurance agents and brokers                      |
| 460 | Newsboys                                          |
| 470 | Real estate agents and brokers                    |
| 480 | Stock and bond salesmen                           |
| 490 | Salesmen and sales clerks (n.e.c.)                |
| 500 | Bakers                                            |
| 501 | Blacksmiths                                       |
| 502 | Bookbinders                                       |
| 503 | Boilermakers                                      |
| 504 | Brickmasons, stonemasons, and tile setters        |
| 505 | Cabinetmakers                                     |
| 510 | Carpenters                                        |
| 511 | Cement and concrete finishers                     |
| 512 | Compositors and typesetters                       |
| 513 | Cranemen, derrickmen, and hoistmen                |
| 514 | Decorators and window dressers                    |
| 515 | Electricians                                      |
| 520 | Electrotypers and stereotypers                    |
| 521 | Engravers, except photoengravers                  |
| 522 | Excavating, grading, and road machinery operators |

|     |                                                         |
|-----|---------------------------------------------------------|
| 523 | Foremen (n.e.c.)                                        |
| 524 | Forgemen and hammermen                                  |
| 525 | Furriers                                                |
| 530 | Glaziers                                                |
| 531 | Heat treaters, annealers, temperers                     |
| 532 | Inspectors, scalers, and graders, log and lumber        |
| 533 | Inspectors (n.e.c.)                                     |
| 534 | Jewelers, watchmakers, goldsmiths, and silversmiths     |
| 535 | Job setters, metal                                      |
| 540 | Linemen and servicemen, telegraph, telephone, and power |
| 541 | Locomotive engineers                                    |
| 542 | Locomotive firemen                                      |
| 543 | Loom fixers                                             |
| 544 | Machinists                                              |
| 545 | Mechanics and repairmen, airplane                       |
| 550 | Mechanics and repairmen, automobile                     |
| 551 | Mechanics and repairmen, office machine                 |
| 552 | Mechanics and repairmen, radio and television           |
| 553 | Mechanics and repairmen, railroad and car shop          |
| 554 | Mechanics and repairmen (n.e.c.)                        |
| 555 | Millers, grain, flour, feed, etc.                       |
| 560 | Millwrights                                             |
| 561 | Molders, metal                                          |
| 562 | Motion picture projectionists                           |



|     |                                                  |
|-----|--------------------------------------------------|
| 563 | Opticians and lens grinders and polishers        |
| 564 | Painters, construction and maintenance           |
| 565 | Paperhangers                                     |
| 570 | Pattern and model makers, except paper           |
| 571 | Photoengravers and lithographers                 |
| 572 | Piano and organ tuners and repairmen             |
| 573 | Plasterers                                       |
| 574 | Plumbers and pipe fitters                        |
| 575 | Pressmen and plate printers, printing            |
| 580 | Rollers and roll hands, metal                    |
| 581 | Roofers and slaters                              |
| 582 | Shoemakers and repairers, except factory         |
| 583 | Stationary engineers                             |
| 584 | Stone cutters and stone carvers                  |
| 585 | Structural metal workers                         |
| 590 | Tailors and tailoresses                          |
| 591 | Tinsmiths, coppersmiths, and sheet metal workers |
| 592 | Tool makers, and die makers and setters          |
| 593 | Upholsterers                                     |
| 594 | Craftsmen and kindred workers (n.e.c.)           |
| 595 | Members of the armed services                    |
| 600 | Apprentice auto mechanics                        |
| 601 | Apprentice bricklayers and masons                |
| 602 | Apprentice carpenters                            |

|     |                                                     |
|-----|-----------------------------------------------------|
| 603 | Apprentice electricians                             |
| 604 | Apprentice machinists and toolmakers                |
| 605 | Apprentice mechanics, except auto                   |
| 610 | Apprentice plumbers and pipe fitters                |
| 611 | Apprentices, building trades (n.e.c.)               |
| 612 | Apprentices, metalworking trades (n.e.c.)           |
| 613 | Apprentices, printing trades                        |
| 614 | Apprentices, other specified trades                 |
| 615 | Apprentices, trade not specified                    |
| 620 | Asbestos and insulation workers                     |
| 621 | Attendants, auto service and parking                |
| 622 | Blasters and powdermen                              |
| 623 | Boatmen, canalmen, and lock keepers                 |
| 624 | Brakemen, railroad                                  |
| 625 | Bus drivers                                         |
| 630 | Chainmen, rodmen, and axmen, surveying              |
| 631 | Conductors, bus and street railway                  |
| 632 | Deliverymen and routemen                            |
| 633 | Dressmakers and seamstresses, except factory        |
| 634 | Dyers                                               |
| 635 | Filers, grinders, and polishers, metal              |
| 640 | Fruit, nut, veg graders and packers, except factory |
| 641 | Furnacemen, smeltermen and pourers                  |
| 642 | Heaters, metal                                      |

|     |                                                  |
|-----|--------------------------------------------------|
| 643 | Laundry and dry cleaning operatives              |
| 644 | Meat cutters, except slaughter and packing house |
| 645 | Milliners                                        |
| 650 | Mine operatives and laborers                     |
| 660 | Motormen, mine, factory, logging camp, etc.      |
| 661 | Motormen, street, subway, and elevated railway   |
| 662 | Oilers and greaser, except auto                  |
| 670 | Painters, except construction or maintenance     |
| 671 | Photographic process workers                     |
| 672 | Power station operators                          |
| 673 | Sailors and deck hands                           |
| 674 | Sawyers                                          |
| 675 | Spinners, textile                                |
| 680 | Stationary firemen                               |
| 681 | Switchmen, railroad                              |
| 682 | Taxicab drivers and chauffers                    |
| 683 | Truck and tractor drivers                        |
| 684 | Weavers, textile                                 |
| 685 | Welders and flame cutters                        |
| 690 | Operative and kindred workers (n.e.c.)           |
| 700 | Housekeepers, private household                  |
| 710 | Laundresses, private household                   |
| 720 | Private household workers (n.e.c.)               |
| 730 | Attendants, hospital and other institution       |

|     |                                                        |
|-----|--------------------------------------------------------|
| 731 | Attendants, professional and personal service (n.e.c.) |
| 732 | Attendants, recreation and amusement                   |
| 740 | Barbers, beauticians, and manicurists                  |
| 750 | Bartenders                                             |
| 751 | Bootblacks                                             |
| 752 | Boarding and lodging house keepers                     |
| 753 | Charwomen and cleaners                                 |
| 754 | Cooks, except private household                        |
| 760 | Counter and fountain workers                           |
| 761 | Elevator operators                                     |
| 762 | Firemen, fire protection                               |
| 763 | Guards, watchmen, and doorkeepers                      |
| 764 | Housekeepers and stewards, except private household    |
| 770 | Janitors and sextons                                   |
| 771 | Marshals and constables                                |
| 772 | Midwives                                               |
| 773 | Policemen and detectives                               |
| 780 | Porters                                                |
| 781 | Practical nurses                                       |
| 782 | Sheriffs and bailiffs                                  |
| 783 | Ushers, recreation and amusement                       |
| 784 | Waiters and waitresses                                 |
| 785 | Watchmen (crossing) and bridge tenders                 |
| 790 | Service workers, except private household (n.e.c.)     |

|     |                                              |
|-----|----------------------------------------------|
| 810 | Farm foremen                                 |
| 820 | Farm laborers, wage workers                  |
| 830 | Farm laborers, unpaid family workers         |
| 840 | Farm service laborers, self-employed         |
| 910 | Fishermen and oystermen                      |
| 920 | Garage laborers and car washers and greasers |
| 930 | Gardeners, except farm, and groundskeepers   |
| 940 | Longshoremen and stevedores                  |
| 950 | Lumbermen, raftsmen, and woodchoppers        |
| 960 | Teamsters                                    |
| 970 | Laborers (n.e.c.)                            |
| 997 | Unknown                                      |
| 999 | Unemployed- last worked over x years ago     |

**Variable: "IND"**

|                |                                                                                                                                                                                                                                                                                                                                                                                                                                                                                                                                                                                                                                                                                                                                                                                                                                                                                                                                                                                                                                                                                                                                |
|----------------|--------------------------------------------------------------------------------------------------------------------------------------------------------------------------------------------------------------------------------------------------------------------------------------------------------------------------------------------------------------------------------------------------------------------------------------------------------------------------------------------------------------------------------------------------------------------------------------------------------------------------------------------------------------------------------------------------------------------------------------------------------------------------------------------------------------------------------------------------------------------------------------------------------------------------------------------------------------------------------------------------------------------------------------------------------------------------------------------------------------------------------|
| Name:          | IND                                                                                                                                                                                                                                                                                                                                                                                                                                                                                                                                                                                                                                                                                                                                                                                                                                                                                                                                                                                                                                                                                                                            |
| Label:         | Industry                                                                                                                                                                                                                                                                                                                                                                                                                                                                                                                                                                                                                                                                                                                                                                                                                                                                                                                                                                                                                                                                                                                       |
| Variable Text: | <p>IND reports the type of industry in which the person performed his or her primary occupation, which is recorded in the variables OCC (Occupation) and, after 1968, OCC1950 (Occupation, 1950 basis). "Industry" refers to the work setting and economic sector, while "occupation" relates to the worker's specific technical function.</p> <p>For persons who were employed at the time of the survey, IND relates to the industrial sector in which the respondent worked during the preceding week. For unemployed persons and those not currently in the labor force, IND characterizes the industrial sector of the respondent's most recent job. The CPS interviewer collected information by asking what kind of work the person was doing, and Census Bureau staff coded the information into the CPS or census industrial classification. Researchers who wish to work with a consistent industrial coding scheme for 1968 forward should use the IND1950 variable. For general discussion of employment concepts, including the definition of those not in the labor force, see the documentation on EMPSTAT.</p> |
| Concept:       | Work Variables -- PERSON                                                                                                                                                                                                                                                                                                                                                                                                                                                                                                                                                                                                                                                                                                                                                                                                                                                                                                                                                                                                                                                                                                       |

|                         |                                                                                                                                                                                                                                                                                                                                                                                                                                                                                                                                                                                                    |
|-------------------------|----------------------------------------------------------------------------------------------------------------------------------------------------------------------------------------------------------------------------------------------------------------------------------------------------------------------------------------------------------------------------------------------------------------------------------------------------------------------------------------------------------------------------------------------------------------------------------------------------|
| Start Position:         | 140                                                                                                                                                                                                                                                                                                                                                                                                                                                                                                                                                                                                |
| End Position:           | 143                                                                                                                                                                                                                                                                                                                                                                                                                                                                                                                                                                                                |
| Width:                  | 4                                                                                                                                                                                                                                                                                                                                                                                                                                                                                                                                                                                                  |
| Variable Format:        | numeric                                                                                                                                                                                                                                                                                                                                                                                                                                                                                                                                                                                            |
| Implied Decimal Places: | 0                                                                                                                                                                                                                                                                                                                                                                                                                                                                                                                                                                                                  |
| Coder Instructions:     | <p>IND is a 4-digit numeric variable.<br/> (Codes for 1962-1967 are 2 digits; each is preceded by two zeroes in the first positions.)<br/> (Codes for 1968-2002 are 3 digits; each is preceded by a zero in the first position.)</p> <p>1962 [URL omitted from DDI.]<br/> 1963-1967 [URL omitted from DDI.]<br/> 1968-1970 [URL omitted from DDI.]<br/> 1971-1982 [URL omitted from DDI.]<br/> 1983-1991 [URL omitted from DDI.]<br/> 1992-2002 [URL omitted from DDI.]<br/> 2003-2008 [URL omitted from DDI.]<br/> 2009-2013 [URL omitted from DDI.]<br/> 2014-onward [URL omitted from DDI.]</p> |

### Variable: "IND1950"

|                 |                                                                                                                                                                                                                                                                                                                                                                                                                                                                                                                              |
|-----------------|------------------------------------------------------------------------------------------------------------------------------------------------------------------------------------------------------------------------------------------------------------------------------------------------------------------------------------------------------------------------------------------------------------------------------------------------------------------------------------------------------------------------------|
| Name:           | IND1950                                                                                                                                                                                                                                                                                                                                                                                                                                                                                                                      |
| Label:          | Industry, 1950 basis                                                                                                                                                                                                                                                                                                                                                                                                                                                                                                         |
| Variable Text:  | <p>IND1950 recodes information contained in the variable IND into the 1950 Census Bureau industrial classification system. Developed to enhance the comparability of industry data in historical U.S. census samples in IPUMS-USA, IND1950 also provides a consistent set of industry codes for IPUMS-CPS from 1968 forward.</p> <p>For general discussion of the IND1950 variable, users should consult the IPUMS-USA documentation. For discussion of the CPS data on industry that are recoded into IND1950, see IND.</p> |
| Concept:        | Work Variables -- PERSON                                                                                                                                                                                                                                                                                                                                                                                                                                                                                                     |
| Start Position: | 144                                                                                                                                                                                                                                                                                                                                                                                                                                                                                                                          |
| End Position:   | 146                                                                                                                                                                                                                                                                                                                                                                                                                                                                                                                          |

|                         |         |
|-------------------------|---------|
| Width:                  | 3       |
| Variable Format:        | numeric |
| Implied Decimal Places: | 0       |

### Categories

| Value | Label                                         |
|-------|-----------------------------------------------|
| 000   | NIU                                           |
| 105   | Agriculture                                   |
| 116   | Forestry                                      |
| 126   | Fisheries                                     |
| 206   | Metal mining                                  |
| 216   | Coal mining                                   |
| 226   | Crude petroleum and natural gas extraction    |
| 236   | Nonmetallic mining and quarrying, except fuel |
| 246   | Construction                                  |
| 306   | Logging                                       |
| 307   | Sawmills, planing mills, and millwork         |
| 308   | Misc wood products                            |
| 309   | Furniture and fixtures                        |
| 316   | Glass and glass products                      |
| 317   | Cement, concrete, gypsum and plaster products |
| 318   | Structural clay products                      |
| 319   | Pottery and related products                  |

|     |                                                         |
|-----|---------------------------------------------------------|
| 326 | Miscellaneous nonmetallic mineral and stone products    |
| 336 | Blast furnaces, steel works, and rolling mills          |
| 337 | Other primary iron and steel industries                 |
| 338 | Primary nonferrous industries                           |
| 346 | Fabricated steel products                               |
| 347 | Fabricated nonferrous metal products                    |
| 348 | Not specified metal industries                          |
| 356 | Agricultural machinery and tractors                     |
| 357 | Office and store machines and devices                   |
| 358 | Miscellaneous machinery                                 |
| 367 | Electrical machinery, equipment, and supplies           |
| 376 | Motor vehicles and motor vehicle equipment              |
| 377 | Aircraft and parts                                      |
| 378 | Ship and boat building and repairing                    |
| 379 | Railroad and miscellaneous transportation equipment     |
| 386 | Professional equipment and supplies                     |
| 387 | Photographic equipment and supplies                     |
| 388 | Watches, clocks, and clockwork-operated devices         |
| 399 | Miscellaneous manufacturing industries                  |
| 406 | Meat products                                           |
| 407 | Dairy products                                          |
| 408 | Canning and preserving fruits, vegetables, and seafoods |
| 409 | Grain-mill products                                     |
| 416 | Bakery products                                         |



|     |                                                      |
|-----|------------------------------------------------------|
| 417 | Confectionery and related products                   |
| 418 | Beverage industries                                  |
| 419 | Miscellaneous food preparations and kindred products |
| 426 | Not specified food industries                        |
| 429 | Tobacco manufactures                                 |
| 436 | Knitting mills                                       |
| 437 | Dyeing and finishing textiles, except knit goods     |
| 438 | Carpets, rugs, and other floor coverings             |
| 439 | Yarn, thread, and fabric mills                       |
| 446 | Miscellaneous textile mill products                  |
| 448 | Apparel and accessories                              |
| 449 | Miscellaneous fabricated textile products            |
| 456 | Pulp, paper, and paperboard mills                    |
| 457 | Paperboard containers and boxes                      |
| 458 | Miscellaneous paper and pulp products                |
| 459 | Printing, publishing, and allied industries          |
| 466 | Synthetic fibers                                     |
| 467 | Drugs and medicines                                  |
| 468 | Paints, varnishes, and related products              |
| 469 | Miscellaneous chemicals and allied products          |
| 476 | Petroleum refining                                   |
| 477 | Miscellaneous petroleum and coal products            |
| 478 | Rubber products                                      |
| 487 | Leather: tanned, curried, and finished               |

|     |                                        |
|-----|----------------------------------------|
| 488 | Footwear, except rubber                |
| 489 | Leather products, except footwear      |
| 499 | Not specified manufacturing industries |
| 506 | Railroads and railway express service  |
| 516 | Street railways and bus lines          |
| 526 | Trucking service                       |
| 527 | Warehousing and storage                |
| 536 | Taxicab service                        |
| 546 | Water transportation                   |
| 556 | Air transportation                     |
| 567 | Petroleum and gasoline pipe lines      |
| 568 | Services incidental to transportation  |
| 578 | Telephone                              |
| 579 | Telegraph                              |
| 586 | Electric light and power               |
| 587 | Gas and steam supply systems           |
| 588 | Electric-gas utilities                 |
| 596 | Water supply                           |
| 597 | Sanitary services                      |
| 598 | Other and not specified utilities      |
| 606 | Motor vehicles and equipment           |
| 607 | Drugs, chemicals, and allied products  |
| 608 | Dry goods apparel                      |
| 609 | Food and related products              |

|     |                                                    |
|-----|----------------------------------------------------|
| 616 | Electrical goods, hardware, and plumbing equipment |
| 617 | Machinery, equipment, and supplies                 |
| 618 | Petroleum products                                 |
| 619 | Farm products--raw materials                       |
| 626 | Miscellaneous wholesale trade                      |
| 627 | Not specified wholesale trade                      |
| 636 | Food stores, except dairy products                 |
| 637 | Dairy products stores and milk retailing           |
| 646 | General merchandise stores                         |
| 647 | Five and ten cent stores                           |
| 656 | Apparel and accessories stores, except shoe        |
| 657 | Shoe stores                                        |
| 658 | Furniture and house furnishing stores              |
| 659 | Household appliance and radio stores               |
| 667 | Motor vehicles and accessories retailing           |
| 668 | Gasoline service stations                          |
| 669 | Drug stores                                        |
| 679 | Eating and drinking places                         |
| 686 | Hardware and farm implement stores                 |
| 687 | Lumber and building material retailing             |
| 688 | Liquor stores                                      |
| 689 | Retail florists                                    |
| 696 | Jewelry stores                                     |
| 697 | Fuel and ice retailing                             |

|     |                                                           |
|-----|-----------------------------------------------------------|
| 698 | Miscellaneous retail stores                               |
| 699 | Not specified retail trade                                |
| 716 | Banking and credit agencies                               |
| 726 | Security and commodity brokerage and investment companies |
| 736 | Insurance                                                 |
| 746 | Real estate                                               |
| 806 | Advertising                                               |
| 807 | Accounting, auditing, and bookkeeping services            |
| 808 | Miscellaneous business services                           |
| 816 | Auto repair services and garages                          |
| 817 | Miscellaneous repair services                             |
| 826 | Private households                                        |
| 836 | Hotels and lodging places                                 |
| 846 | Laundering, cleaning, and dyeing services                 |
| 847 | Dressmaking shops                                         |
| 848 | Shoe repair shops                                         |
| 849 | Miscellaneous personal services                           |
| 856 | Radio broadcasting and television                         |
| 857 | Theaters and motion pictures                              |
| 858 | Bowling alleys, and billiard and pool parlors             |
| 859 | Miscellaneous entertainment and recreation services       |
| 868 | Medical and other health services, except hospitals       |
| 869 | Hospitals                                                 |
| 879 | Legal services                                            |

|     |                                                 |
|-----|-------------------------------------------------|
| 888 | Educational services                            |
| 896 | Welfare and religious services                  |
| 897 | Nonprofit membership organizations              |
| 898 | Engineering and architectural services          |
| 899 | Miscellaneous professional and related services |
| 906 | Postal service                                  |
| 916 | Federal public administration                   |
| 926 | State public administration                     |
| 936 | Local public administration                     |
| 997 | Nonclassifiable                                 |
| 998 | Industry not reported                           |

### Variable: "CLASSWKR"

|                 |                                                                                                                                                                                                                                                                                                                                                                                                                                                                                                                                                                                                                                                                                                                                                                                                           |
|-----------------|-----------------------------------------------------------------------------------------------------------------------------------------------------------------------------------------------------------------------------------------------------------------------------------------------------------------------------------------------------------------------------------------------------------------------------------------------------------------------------------------------------------------------------------------------------------------------------------------------------------------------------------------------------------------------------------------------------------------------------------------------------------------------------------------------------------|
| Name:           | CLASSWKR                                                                                                                                                                                                                                                                                                                                                                                                                                                                                                                                                                                                                                                                                                                                                                                                  |
| Label:          | Class of worker                                                                                                                                                                                                                                                                                                                                                                                                                                                                                                                                                                                                                                                                                                                                                                                           |
| Variable Text:  | <p>CLASSWKR indicates whether a respondent was self-employed, was an employee in private industry or the public sector, was in the armed forces, or worked without pay in a family business or farm. Workers with multiple sources of employment were classified according to the job in which they worked the most hours. For persons employed at the time of the survey, CLASSWKR relates to the respondent's job during the previous week. Respondents who were not employed during the previous week reported the most recent job. The CLASSWLY variable deals with the longest job held during the previous calendar year.</p> <p>In the original CPS public use data, members of the armed forces are coded as N.I.U. (Not in Universe), because they are not part of the civilian labor force.</p> |
| Concept:        | Work Variables -- PERSON                                                                                                                                                                                                                                                                                                                                                                                                                                                                                                                                                                                                                                                                                                                                                                                  |
| Start Position: | 147                                                                                                                                                                                                                                                                                                                                                                                                                                                                                                                                                                                                                                                                                                                                                                                                       |
| End Position:   | 148                                                                                                                                                                                                                                                                                                                                                                                                                                                                                                                                                                                                                                                                                                                                                                                                       |

| Width:                                                                                                                                                                                                                                                                                                                                                                                                                                                                                                                                                                                                                                                                                                                                                                                                                                                                                                                               | 2                               |       |       |    |     |    |               |    |                                 |    |                             |    |                           |    |                      |    |                     |    |                    |    |                         |    |                             |    |              |    |                           |    |                           |    |                      |    |                 |
|--------------------------------------------------------------------------------------------------------------------------------------------------------------------------------------------------------------------------------------------------------------------------------------------------------------------------------------------------------------------------------------------------------------------------------------------------------------------------------------------------------------------------------------------------------------------------------------------------------------------------------------------------------------------------------------------------------------------------------------------------------------------------------------------------------------------------------------------------------------------------------------------------------------------------------------|---------------------------------|-------|-------|----|-----|----|---------------|----|---------------------------------|----|-----------------------------|----|---------------------------|----|----------------------|----|---------------------|----|--------------------|----|-------------------------|----|-----------------------------|----|--------------|----|---------------------------|----|---------------------------|----|----------------------|----|-----------------|
| Variable Format:                                                                                                                                                                                                                                                                                                                                                                                                                                                                                                                                                                                                                                                                                                                                                                                                                                                                                                                     | numeric                         |       |       |    |     |    |               |    |                                 |    |                             |    |                           |    |                      |    |                     |    |                    |    |                         |    |                             |    |              |    |                           |    |                           |    |                      |    |                 |
| Implied Decimal Places:                                                                                                                                                                                                                                                                                                                                                                                                                                                                                                                                                                                                                                                                                                                                                                                                                                                                                                              | 0                               |       |       |    |     |    |               |    |                                 |    |                             |    |                           |    |                      |    |                     |    |                    |    |                         |    |                             |    |              |    |                           |    |                           |    |                      |    |                 |
| <b>Categories</b>                                                                                                                                                                                                                                                                                                                                                                                                                                                                                                                                                                                                                                                                                                                                                                                                                                                                                                                    |                                 |       |       |    |     |    |               |    |                                 |    |                             |    |                           |    |                      |    |                     |    |                    |    |                         |    |                             |    |              |    |                           |    |                           |    |                      |    |                 |
| <table border="1"> <thead> <tr> <th>Value</th> <th>Label</th> </tr> </thead> <tbody> <tr> <td>00</td> <td>NIU</td> </tr> <tr> <td>10</td> <td>Self-employed</td> </tr> <tr> <td>13</td> <td>Self-employed, not incorporated</td> </tr> <tr> <td>14</td> <td>Self-employed, incorporated</td> </tr> <tr> <td>20</td> <td>Works for wages or salary</td> </tr> <tr> <td>21</td> <td>Wage/salary, private</td> </tr> <tr> <td>22</td> <td>Private, for profit</td> </tr> <tr> <td>23</td> <td>Private, nonprofit</td> </tr> <tr> <td>24</td> <td>Wage/salary, government</td> </tr> <tr> <td>25</td> <td>Federal government employee</td> </tr> <tr> <td>26</td> <td>Armed forces</td> </tr> <tr> <td>27</td> <td>State government employee</td> </tr> <tr> <td>28</td> <td>Local government employee</td> </tr> <tr> <td>29</td> <td>Unpaid family worker</td> </tr> <tr> <td>99</td> <td>Missing/Unknown</td> </tr> </tbody> </table> |                                 | Value | Label | 00 | NIU | 10 | Self-employed | 13 | Self-employed, not incorporated | 14 | Self-employed, incorporated | 20 | Works for wages or salary | 21 | Wage/salary, private | 22 | Private, for profit | 23 | Private, nonprofit | 24 | Wage/salary, government | 25 | Federal government employee | 26 | Armed forces | 27 | State government employee | 28 | Local government employee | 29 | Unpaid family worker | 99 | Missing/Unknown |
| Value                                                                                                                                                                                                                                                                                                                                                                                                                                                                                                                                                                                                                                                                                                                                                                                                                                                                                                                                | Label                           |       |       |    |     |    |               |    |                                 |    |                             |    |                           |    |                      |    |                     |    |                    |    |                         |    |                             |    |              |    |                           |    |                           |    |                      |    |                 |
| 00                                                                                                                                                                                                                                                                                                                                                                                                                                                                                                                                                                                                                                                                                                                                                                                                                                                                                                                                   | NIU                             |       |       |    |     |    |               |    |                                 |    |                             |    |                           |    |                      |    |                     |    |                    |    |                         |    |                             |    |              |    |                           |    |                           |    |                      |    |                 |
| 10                                                                                                                                                                                                                                                                                                                                                                                                                                                                                                                                                                                                                                                                                                                                                                                                                                                                                                                                   | Self-employed                   |       |       |    |     |    |               |    |                                 |    |                             |    |                           |    |                      |    |                     |    |                    |    |                         |    |                             |    |              |    |                           |    |                           |    |                      |    |                 |
| 13                                                                                                                                                                                                                                                                                                                                                                                                                                                                                                                                                                                                                                                                                                                                                                                                                                                                                                                                   | Self-employed, not incorporated |       |       |    |     |    |               |    |                                 |    |                             |    |                           |    |                      |    |                     |    |                    |    |                         |    |                             |    |              |    |                           |    |                           |    |                      |    |                 |
| 14                                                                                                                                                                                                                                                                                                                                                                                                                                                                                                                                                                                                                                                                                                                                                                                                                                                                                                                                   | Self-employed, incorporated     |       |       |    |     |    |               |    |                                 |    |                             |    |                           |    |                      |    |                     |    |                    |    |                         |    |                             |    |              |    |                           |    |                           |    |                      |    |                 |
| 20                                                                                                                                                                                                                                                                                                                                                                                                                                                                                                                                                                                                                                                                                                                                                                                                                                                                                                                                   | Works for wages or salary       |       |       |    |     |    |               |    |                                 |    |                             |    |                           |    |                      |    |                     |    |                    |    |                         |    |                             |    |              |    |                           |    |                           |    |                      |    |                 |
| 21                                                                                                                                                                                                                                                                                                                                                                                                                                                                                                                                                                                                                                                                                                                                                                                                                                                                                                                                   | Wage/salary, private            |       |       |    |     |    |               |    |                                 |    |                             |    |                           |    |                      |    |                     |    |                    |    |                         |    |                             |    |              |    |                           |    |                           |    |                      |    |                 |
| 22                                                                                                                                                                                                                                                                                                                                                                                                                                                                                                                                                                                                                                                                                                                                                                                                                                                                                                                                   | Private, for profit             |       |       |    |     |    |               |    |                                 |    |                             |    |                           |    |                      |    |                     |    |                    |    |                         |    |                             |    |              |    |                           |    |                           |    |                      |    |                 |
| 23                                                                                                                                                                                                                                                                                                                                                                                                                                                                                                                                                                                                                                                                                                                                                                                                                                                                                                                                   | Private, nonprofit              |       |       |    |     |    |               |    |                                 |    |                             |    |                           |    |                      |    |                     |    |                    |    |                         |    |                             |    |              |    |                           |    |                           |    |                      |    |                 |
| 24                                                                                                                                                                                                                                                                                                                                                                                                                                                                                                                                                                                                                                                                                                                                                                                                                                                                                                                                   | Wage/salary, government         |       |       |    |     |    |               |    |                                 |    |                             |    |                           |    |                      |    |                     |    |                    |    |                         |    |                             |    |              |    |                           |    |                           |    |                      |    |                 |
| 25                                                                                                                                                                                                                                                                                                                                                                                                                                                                                                                                                                                                                                                                                                                                                                                                                                                                                                                                   | Federal government employee     |       |       |    |     |    |               |    |                                 |    |                             |    |                           |    |                      |    |                     |    |                    |    |                         |    |                             |    |              |    |                           |    |                           |    |                      |    |                 |
| 26                                                                                                                                                                                                                                                                                                                                                                                                                                                                                                                                                                                                                                                                                                                                                                                                                                                                                                                                   | Armed forces                    |       |       |    |     |    |               |    |                                 |    |                             |    |                           |    |                      |    |                     |    |                    |    |                         |    |                             |    |              |    |                           |    |                           |    |                      |    |                 |
| 27                                                                                                                                                                                                                                                                                                                                                                                                                                                                                                                                                                                                                                                                                                                                                                                                                                                                                                                                   | State government employee       |       |       |    |     |    |               |    |                                 |    |                             |    |                           |    |                      |    |                     |    |                    |    |                         |    |                             |    |              |    |                           |    |                           |    |                      |    |                 |
| 28                                                                                                                                                                                                                                                                                                                                                                                                                                                                                                                                                                                                                                                                                                                                                                                                                                                                                                                                   | Local government employee       |       |       |    |     |    |               |    |                                 |    |                             |    |                           |    |                      |    |                     |    |                    |    |                         |    |                             |    |              |    |                           |    |                           |    |                      |    |                 |
| 29                                                                                                                                                                                                                                                                                                                                                                                                                                                                                                                                                                                                                                                                                                                                                                                                                                                                                                                                   | Unpaid family worker            |       |       |    |     |    |               |    |                                 |    |                             |    |                           |    |                      |    |                     |    |                    |    |                         |    |                             |    |              |    |                           |    |                           |    |                      |    |                 |
| 99                                                                                                                                                                                                                                                                                                                                                                                                                                                                                                                                                                                                                                                                                                                                                                                                                                                                                                                                   | Missing/Unknown                 |       |       |    |     |    |               |    |                                 |    |                             |    |                           |    |                      |    |                     |    |                    |    |                         |    |                             |    |              |    |                           |    |                           |    |                      |    |                 |

**Variable: "WKSWORK1"**

|       |          |
|-------|----------|
| Name: | WKSWORK1 |
|-------|----------|

|                         |                                                                                                                                                                                                                                                                                                                                                                                                                                                     |
|-------------------------|-----------------------------------------------------------------------------------------------------------------------------------------------------------------------------------------------------------------------------------------------------------------------------------------------------------------------------------------------------------------------------------------------------------------------------------------------------|
| Label:                  | Weeks worked last year                                                                                                                                                                                                                                                                                                                                                                                                                              |
| Variable Text:          | WKSWORK1 reports the number of weeks, in single weeks, that the respondent worked for profit, pay, or as an unpaid family worker during the preceding calendar year. Respondents were prompted to count weeks in which they worked for even a few hours and to include paid vacation and sick leave as work. Information on weeks worked during the preceding year is available in the form of intervals for 1962 forward in the WKSWORK2 variable. |
| Concept:                | Work Variables -- PERSON                                                                                                                                                                                                                                                                                                                                                                                                                            |
| Start Position:         | 149                                                                                                                                                                                                                                                                                                                                                                                                                                                 |
| End Position:           | 150                                                                                                                                                                                                                                                                                                                                                                                                                                                 |
| Width:                  | 2                                                                                                                                                                                                                                                                                                                                                                                                                                                   |
| Variable Format:        | numeric                                                                                                                                                                                                                                                                                                                                                                                                                                             |
| Implied Decimal Places: | 0                                                                                                                                                                                                                                                                                                                                                                                                                                                   |
| Coder Instructions:     | WKSWORK1 is a 2-digit numeric value.                                                                                                                                                                                                                                                                                                                                                                                                                |

### Variable: "UHRSWORKLY"

|                 |                                                                                                                                                                                                                                                                                                                                                                                                                                                                                                                                                       |
|-----------------|-------------------------------------------------------------------------------------------------------------------------------------------------------------------------------------------------------------------------------------------------------------------------------------------------------------------------------------------------------------------------------------------------------------------------------------------------------------------------------------------------------------------------------------------------------|
| Name:           | UHRSWORKLY                                                                                                                                                                                                                                                                                                                                                                                                                                                                                                                                            |
| Label:          | Usual hours worked per week (last yr)                                                                                                                                                                                                                                                                                                                                                                                                                                                                                                                 |
| Variable Text:  | <p>UHRSWORKLY reports the number of hours per week that respondents usually worked if they worked during the previous calendar year. Individuals were asked this question if: 1) they reported working at a job or business at any time during the previous year or 2) they acknowledged doing "any temporary, part-time, or seasonal work even for a few days" during the previous year.</p> <p>See the Hours Worked Variables Notes [URL omitted from DDI.] for an overview of the different actual and usual hours worked variables available.</p> |
| Concept:        | Work Variables -- PERSON                                                                                                                                                                                                                                                                                                                                                                                                                                                                                                                              |
| Start Position: | 151                                                                                                                                                                                                                                                                                                                                                                                                                                                                                                                                                   |
| End Position:   | 153                                                                                                                                                                                                                                                                                                                                                                                                                                                                                                                                                   |
| Width:          | 3                                                                                                                                                                                                                                                                                                                                                                                                                                                                                                                                                     |

|                         |                                                                                                |
|-------------------------|------------------------------------------------------------------------------------------------|
| Variable Format:        | numeric                                                                                        |
| Implied Decimal Places: | 0                                                                                              |
| Coder Instructions:     | UHRSWORKLY is a 2-digit numeric value.<br>99 = 99 hours or more<br>999 = NIU (Not in universe) |

**Variable: "UHRSWORKT"**

|                         |                                                                                                                                                                                                                                                                                    |
|-------------------------|------------------------------------------------------------------------------------------------------------------------------------------------------------------------------------------------------------------------------------------------------------------------------------|
| Name:                   | UHRSWORKT                                                                                                                                                                                                                                                                          |
| Label:                  | Hours usually worked per week at all jobs                                                                                                                                                                                                                                          |
| Variable Text:          | UHRSWORKT is the usual number of hours per week the respondent reports being at all jobs, over an unspecified time period.<br><br>See the Hours Worked Variables Notes [URL omitted from DDI.] for an overview of the different actual and usual hours worked variables available. |
| Concept:                | Work Variables -- PERSON                                                                                                                                                                                                                                                           |
| Start Position:         | 154                                                                                                                                                                                                                                                                                |
| End Position:           | 156                                                                                                                                                                                                                                                                                |
| Width:                  | 3                                                                                                                                                                                                                                                                                  |
| Variable Format:        | numeric                                                                                                                                                                                                                                                                            |
| Implied Decimal Places: | 0                                                                                                                                                                                                                                                                                  |

**Categories**

| Value | Label      |
|-------|------------|
| 997   | Hours vary |
| 999   | NIU        |

**Variable: "UHRSWORK1"**



| Name:                                                                                                                                                                                                                                    | UHRSWORK1                                                                                                                                                                                                                                                                                                                                                                        |       |       |     |         |     |            |     |             |
|------------------------------------------------------------------------------------------------------------------------------------------------------------------------------------------------------------------------------------------|----------------------------------------------------------------------------------------------------------------------------------------------------------------------------------------------------------------------------------------------------------------------------------------------------------------------------------------------------------------------------------|-------|-------|-----|---------|-----|------------|-----|-------------|
| Label:                                                                                                                                                                                                                                   | Hours usually worked per week at main job                                                                                                                                                                                                                                                                                                                                        |       |       |     |         |     |            |     |             |
| Variable Text:                                                                                                                                                                                                                           | <p>UHRSWORK1 is the usual number of hours per week the respondent reports being at their main job. There is no time period specified, unlike for UHRSWORKLY, which specifies the reference time period as last year.</p> <p>See the Hours Worked Variables Notes [URL omitted from DDI.] for an overview of the different actual and usual hours worked variables available.</p> |       |       |     |         |     |            |     |             |
| Concept:                                                                                                                                                                                                                                 | Work Variables -- PERSON                                                                                                                                                                                                                                                                                                                                                         |       |       |     |         |     |            |     |             |
| Start Position:                                                                                                                                                                                                                          | 157                                                                                                                                                                                                                                                                                                                                                                              |       |       |     |         |     |            |     |             |
| End Position:                                                                                                                                                                                                                            | 159                                                                                                                                                                                                                                                                                                                                                                              |       |       |     |         |     |            |     |             |
| Width:                                                                                                                                                                                                                                   | 3                                                                                                                                                                                                                                                                                                                                                                                |       |       |     |         |     |            |     |             |
| Variable Format:                                                                                                                                                                                                                         | numeric                                                                                                                                                                                                                                                                                                                                                                          |       |       |     |         |     |            |     |             |
| Implied Decimal Places:                                                                                                                                                                                                                  | 0                                                                                                                                                                                                                                                                                                                                                                                |       |       |     |         |     |            |     |             |
| <b>Categories</b>                                                                                                                                                                                                                        |                                                                                                                                                                                                                                                                                                                                                                                  |       |       |     |         |     |            |     |             |
| <table border="1"> <thead> <tr> <th>Value</th> <th>Label</th> </tr> </thead> <tbody> <tr> <td>000</td> <td>0 hours</td> </tr> <tr> <td>997</td> <td>Hours vary</td> </tr> <tr> <td>999</td> <td>NIU/Missing</td> </tr> </tbody> </table> |                                                                                                                                                                                                                                                                                                                                                                                  | Value | Label | 000 | 0 hours | 997 | Hours vary | 999 | NIU/Missing |
| Value                                                                                                                                                                                                                                    | Label                                                                                                                                                                                                                                                                                                                                                                            |       |       |     |         |     |            |     |             |
| 000                                                                                                                                                                                                                                      | 0 hours                                                                                                                                                                                                                                                                                                                                                                          |       |       |     |         |     |            |     |             |
| 997                                                                                                                                                                                                                                      | Hours vary                                                                                                                                                                                                                                                                                                                                                                       |       |       |     |         |     |            |     |             |
| 999                                                                                                                                                                                                                                      | NIU/Missing                                                                                                                                                                                                                                                                                                                                                                      |       |       |     |         |     |            |     |             |

**Variable: "AHRSWORKT"**

|                |                                                                                                                                                                                                                                                                                                                                                                                                                                            |
|----------------|--------------------------------------------------------------------------------------------------------------------------------------------------------------------------------------------------------------------------------------------------------------------------------------------------------------------------------------------------------------------------------------------------------------------------------------------|
| Name:          | AHRSWORKT                                                                                                                                                                                                                                                                                                                                                                                                                                  |
| Label:         | Hours worked last week                                                                                                                                                                                                                                                                                                                                                                                                                     |
| Variable Text: | <p>AHRSWORKT reports the total number of hours the respondent was at work during the previous week. For employers and the self-employed, this includes all hours spent attending to their operation(s) or enterprise(s). For employees, it is the number of hours they spent at work. For unpaid family workers, it is the number of hours spent doing work directly related to the family business or farm (not including housework).</p> |

|                         |                                                                                                                                        |
|-------------------------|----------------------------------------------------------------------------------------------------------------------------------------|
|                         | See the Hours Worked Variables Notes [URL omitted from DDI.] for an overview of the different actual and usual hours worked variables. |
| Concept:                | Work Variables -- PERSON                                                                                                               |
| Start Position:         | 160                                                                                                                                    |
| End Position:           | 162                                                                                                                                    |
| Width:                  | 3                                                                                                                                      |
| Variable Format:        | numeric                                                                                                                                |
| Implied Decimal Places: | 0                                                                                                                                      |
| Coder Instructions:     | AHRSWORKT is a 3-digit numeric variable.<br>999 = NIU (Not in universe)                                                                |

### Variable: "HOURWAGE"

|                 |                                                                                                                                                                                                                                                                                                                                                                                                                                                                                                                                                                                                                                                                     |
|-----------------|---------------------------------------------------------------------------------------------------------------------------------------------------------------------------------------------------------------------------------------------------------------------------------------------------------------------------------------------------------------------------------------------------------------------------------------------------------------------------------------------------------------------------------------------------------------------------------------------------------------------------------------------------------------------|
| Name:           | HOURWAGE                                                                                                                                                                                                                                                                                                                                                                                                                                                                                                                                                                                                                                                            |
| Label:          | Hourly wage                                                                                                                                                                                                                                                                                                                                                                                                                                                                                                                                                                                                                                                         |
| Variable Text:  | <p>HOURWAGE reports how much the respondent earned per hour in the current job, for those workers paid an hourly wage (and coded as "2" in PAIDHOUR). Amounts are expressed as they were reported to the interviewer; users must adjust for inflation using Consumer Price Index [URL omitted from DDI.] adjustment factors. Researchers should use the EARNWT weight with this variable.</p> <p>Users should note that HOURWAGE originally had two implied decimal places, but was revised so that the command files provided by IPUMS divide HOURWAGE by 100.</p> <p>HOURWAGE is one of the Outgoing Rotation/Earner Study [URL omitted from DDI.] questions.</p> |
| Concept:        | Outgoing Rotation Groups (Earner Study) Variables -- PERSON                                                                                                                                                                                                                                                                                                                                                                                                                                                                                                                                                                                                         |
| Start Position: | 163                                                                                                                                                                                                                                                                                                                                                                                                                                                                                                                                                                                                                                                                 |
| End Position:   | 166                                                                                                                                                                                                                                                                                                                                                                                                                                                                                                                                                                                                                                                                 |
| Width:          | 4                                                                                                                                                                                                                                                                                                                                                                                                                                                                                                                                                                                                                                                                   |

|                         |                                                                                                                                                                 |
|-------------------------|-----------------------------------------------------------------------------------------------------------------------------------------------------------------|
| Variable Format:        | numeric                                                                                                                                                         |
| Implied Decimal Places: | 2                                                                                                                                                               |
| Coder Instructions:     | <p>99.99 = N.I.U. (Not in Universe).<br/> 99.97 = Top Code (Wages of \$99.99 an hour or more).</p> <p>See User Note [URL omitted from DDI.] for these codes</p> |

### Variable: "PAIDHOUR"

|                         |                                                                                                                                                                                                                                                                                             |
|-------------------------|---------------------------------------------------------------------------------------------------------------------------------------------------------------------------------------------------------------------------------------------------------------------------------------------|
| Name:                   | PAIDHOUR                                                                                                                                                                                                                                                                                    |
| Label:                  | Paid by the hour                                                                                                                                                                                                                                                                            |
| Variable Text:          | <p>PAIDHOUR is a dichotomous variable indicating whether the respondent was paid by the hour for their current job or not. Researchers should use the EARNWT weight with this variable.</p> <p>PAIDHOUR is one of the Outgoing Rotation/Earner Study [URL omitted from DDI.] questions.</p> |
| Concept:                | Outgoing Rotation Groups (Earner Study) Variables -- PERSON                                                                                                                                                                                                                                 |
| Start Position:         | 167                                                                                                                                                                                                                                                                                         |
| End Position:           | 167                                                                                                                                                                                                                                                                                         |
| Width:                  | 1                                                                                                                                                                                                                                                                                           |
| Variable Format:        | numeric                                                                                                                                                                                                                                                                                     |
| Implied Decimal Places: | 0                                                                                                                                                                                                                                                                                           |

#### Categories

| Value | Label |
|-------|-------|
| 0     | NIU   |
| 1     | No    |

|   |            |
|---|------------|
| 2 | Yes        |
| 6 | Refused    |
| 7 | Don't Know |

**Variable: "UNION"**

|                         |                                                                                                                                                                                                                                                                                                                                                      |
|-------------------------|------------------------------------------------------------------------------------------------------------------------------------------------------------------------------------------------------------------------------------------------------------------------------------------------------------------------------------------------------|
| Name:                   | UNION                                                                                                                                                                                                                                                                                                                                                |
| Label:                  | Union membership                                                                                                                                                                                                                                                                                                                                     |
| Variable Text:          | UNION indicates whether, for the current job, the respondent was: 1) a member of a labor union or employee association similar to a union; 2) not a union member but covered by a union or employee association contract; or 3) neither a union member nor covered by a union contract. Researchers should use the EARNWT weight with this variable. |
| Concept:                | Outgoing Rotation Groups (Earner Study) Variables -- PERSON                                                                                                                                                                                                                                                                                          |
| Start Position:         | 168                                                                                                                                                                                                                                                                                                                                                  |
| End Position:           | 168                                                                                                                                                                                                                                                                                                                                                  |
| Width:                  | 1                                                                                                                                                                                                                                                                                                                                                    |
| Variable Format:        | numeric                                                                                                                                                                                                                                                                                                                                              |
| Implied Decimal Places: | 0                                                                                                                                                                                                                                                                                                                                                    |

**Categories**

| Value | Label                             |
|-------|-----------------------------------|
| 0     | NIU                               |
| 1     | No union coverage                 |
| 2     | Member of labor union             |
| 3     | Covered by union but not a member |

**Variable: "FIRMSIZE"**

|                         |                                                                                                                                                                                                                                                                                                                                                                                                                                                                                                      |
|-------------------------|------------------------------------------------------------------------------------------------------------------------------------------------------------------------------------------------------------------------------------------------------------------------------------------------------------------------------------------------------------------------------------------------------------------------------------------------------------------------------------------------------|
| Name:                   | FIRMSIZE                                                                                                                                                                                                                                                                                                                                                                                                                                                                                             |
| Label:                  | Number of employees                                                                                                                                                                                                                                                                                                                                                                                                                                                                                  |
| Variable Text:          | FIRMSIZE indicates the total number of persons who worked for the respondent's employer during the preceding calendar year, counting all locations where the employer operated. If the individual was self-employed in a business or farm, the response to FIRMSIZE indicates how many employees worked for the respondent. Responses were grouped into broad categories, such as "under 25 employees," "25 to 99 employees," "100 to 499 employees," "500 to 999 employees," and "1000+ employees." |
| Concept:                | Work Variables -- PERSON                                                                                                                                                                                                                                                                                                                                                                                                                                                                             |
| Start Position:         | 169                                                                                                                                                                                                                                                                                                                                                                                                                                                                                                  |
| End Position:           | 169                                                                                                                                                                                                                                                                                                                                                                                                                                                                                                  |
| Width:                  | 1                                                                                                                                                                                                                                                                                                                                                                                                                                                                                                    |
| Variable Format:        | numeric                                                                                                                                                                                                                                                                                                                                                                                                                                                                                              |
| Implied Decimal Places: | 0                                                                                                                                                                                                                                                                                                                                                                                                                                                                                                    |

**Categories**

| Value | Label    |
|-------|----------|
| 0     | NIU      |
| 1     | Under 10 |
| 2     | 10 to 24 |
| 3     | Under 25 |
| 4     | 10 to 49 |
| 5     | 25 to 99 |
| 6     | 50 to 99 |

|   |            |
|---|------------|
| 7 | 100 to 499 |
| 8 | 500 to 999 |
| 9 | 1000+      |

**Variable: "INCWAGE"**

|                         |                                                                                                                                                                                                                                                                                                                                                                                                                                                                                                                                                                                                                                                      |
|-------------------------|------------------------------------------------------------------------------------------------------------------------------------------------------------------------------------------------------------------------------------------------------------------------------------------------------------------------------------------------------------------------------------------------------------------------------------------------------------------------------------------------------------------------------------------------------------------------------------------------------------------------------------------------------|
| Name:                   | INCWAGE                                                                                                                                                                                                                                                                                                                                                                                                                                                                                                                                                                                                                                              |
| Label:                  | Wage and salary income                                                                                                                                                                                                                                                                                                                                                                                                                                                                                                                                                                                                                               |
| Variable Text:          | <p>INCWAGE indicates each respondent's total pre-tax wage and salary income--that is, money received as an employee--for the previous calendar year. Amounts are expressed as they were reported to the interviewer; users must adjust for inflation using Consumer Price Index [URL omitted from DDI.] adjustment factors.</p> <p>For ASEC samples 1988-onward, INCWAGE is derived from a Census recode variable. The topcoded components of INCWAGE are OINCWAGE and INCLONGJ. OINCWAGE is always a component of INCWAGE. When SRCEARN indicates that INCLONGJ is earned from wage and salary, INCLONGJ is an additional component of INCWAGE.</p> |
| Concept:                | Income Variables -- PERSON                                                                                                                                                                                                                                                                                                                                                                                                                                                                                                                                                                                                                           |
| Start Position:         | 170                                                                                                                                                                                                                                                                                                                                                                                                                                                                                                                                                                                                                                                  |
| End Position:           | 176                                                                                                                                                                                                                                                                                                                                                                                                                                                                                                                                                                                                                                                  |
| Width:                  | 7                                                                                                                                                                                                                                                                                                                                                                                                                                                                                                                                                                                                                                                    |
| Variable Format:        | numeric                                                                                                                                                                                                                                                                                                                                                                                                                                                                                                                                                                                                                                              |
| Implied Decimal Places: | 0                                                                                                                                                                                                                                                                                                                                                                                                                                                                                                                                                                                                                                                    |
| Coder Instructions:     | <p>9999999 = N.I.U. (Not in Universe).<br/>9999998 = Missing.</p> <p>IPUMS does not identify topcodes in the data. Refer to the Topcodes Tables link below for income topcodes documentation.</p> <p>See User Note [URL omitted from DDI.] for an explanation of these codes, and the Topcodes Tables [URL omitted from DDI.] page for documentation on income component topcodes over time.</p>                                                                                                                                                                                                                                                     |

**Variable: "INCFARM"**

|                         |                                                                                                                                                                                                                                                                                                                                                                                                                                                                                                                                                                                                                                                                                                                                                                                                                                                            |
|-------------------------|------------------------------------------------------------------------------------------------------------------------------------------------------------------------------------------------------------------------------------------------------------------------------------------------------------------------------------------------------------------------------------------------------------------------------------------------------------------------------------------------------------------------------------------------------------------------------------------------------------------------------------------------------------------------------------------------------------------------------------------------------------------------------------------------------------------------------------------------------------|
| Name:                   | INCFARM                                                                                                                                                                                                                                                                                                                                                                                                                                                                                                                                                                                                                                                                                                                                                                                                                                                    |
| Label:                  | Farm income                                                                                                                                                                                                                                                                                                                                                                                                                                                                                                                                                                                                                                                                                                                                                                                                                                                |
| Variable Text:          | <p>INCFARM indicates each respondent's net pre-income-tax earnings as a tenant farmer, sharecropper, or operator of his or her own farm during the previous calendar year. INCFARM collects income information for self-employed persons who had their own farms. Income earned as an employee on a farm is contained in the variable INCWAGE.</p> <p>Amounts are expressed as they were reported to the interviewer; users must adjust for inflation using Consumer Price Index [URL omitted from DDI.] adjustment factors.</p> <p>For ASEC samples 1988-onward, INCFARM is derived from a Census recode variable. The topcoded components of INCFARM are OINCFARM and INCLONGJ. OINCFARM is always a component of INCFARM. When SRCEARN indicates that INCLONGJ is earned from farm self-employment, INCLONGJ is an additional component of INCFARM.</p> |
| Concept:                | Income Variables -- PERSON                                                                                                                                                                                                                                                                                                                                                                                                                                                                                                                                                                                                                                                                                                                                                                                                                                 |
| Start Position:         | 177                                                                                                                                                                                                                                                                                                                                                                                                                                                                                                                                                                                                                                                                                                                                                                                                                                                        |
| End Position:           | 183                                                                                                                                                                                                                                                                                                                                                                                                                                                                                                                                                                                                                                                                                                                                                                                                                                                        |
| Width:                  | 7                                                                                                                                                                                                                                                                                                                                                                                                                                                                                                                                                                                                                                                                                                                                                                                                                                                          |
| Variable Format:        | numeric                                                                                                                                                                                                                                                                                                                                                                                                                                                                                                                                                                                                                                                                                                                                                                                                                                                    |
| Implied Decimal Places: | 0                                                                                                                                                                                                                                                                                                                                                                                                                                                                                                                                                                                                                                                                                                                                                                                                                                                          |
| Coder Instructions:     | <p>9999999 = N.I.U. (Not in Universe).<br/> 9999998 = Missing.<br/> Values can be negative.</p> <p>IPUMS does not identify topcodes in the data. Refer to the Topcodes Tables link below for income topcodes documentation.</p> <p>See User Note [URL omitted from DDI.] for an explanation of these codes, and the Topcodes Tables [URL omitted from DDI.] page for documentation on income component topcodes over time.</p>                                                                                                                                                                                                                                                                                                                                                                                                                             |

**Variable: "EARNWEEK"**

|        |                 |
|--------|-----------------|
| Name:  | EARNWEEK        |
| Label: | Weekly earnings |

|                         |                                                                                                                                                                                                                                                                                                                                                                                                                                                                                                                                                                                                                                                                                                                                                                                                                                                                                                                                                                                                                                                                                                                                                                                                                                        |
|-------------------------|----------------------------------------------------------------------------------------------------------------------------------------------------------------------------------------------------------------------------------------------------------------------------------------------------------------------------------------------------------------------------------------------------------------------------------------------------------------------------------------------------------------------------------------------------------------------------------------------------------------------------------------------------------------------------------------------------------------------------------------------------------------------------------------------------------------------------------------------------------------------------------------------------------------------------------------------------------------------------------------------------------------------------------------------------------------------------------------------------------------------------------------------------------------------------------------------------------------------------------------|
| Variable Text:          | <p>EARNWEEK reports how much the respondent usually earned per week at their current job, before deductions. Interviewers asked directly about total weekly earnings and also collected information about the usual number of hours worked per week and the hourly rate of pay at the current job. The figure given in EARNWEEK is the higher of the values derived from these two sources: 1) the respondent's answer to the question, "How much do you usually earn per week at this job before deductions?"; or 2) for workers paid by the hour (and coded as "2" in PAIDHOUR), the reported number of hours the respondent usually worked at the job, multiplied by the hourly wage rate given in HOURWAGE.</p> <p>The values in EARNWEEK are in dollars, with no implied decimal places; a value of 500 means that the respondent earned five hundred dollars per week before deductions. Amounts are expressed as they were reported to the interviewer; users must adjust for inflation using Consumer Price Index [URL omitted from DDI.] adjustment factors. Researchers should use the EARNWT weight with this variable.</p> <p>EARNWEEK is one of the Outgoing Rotation/Earner Study [URL omitted from DDI.] questions.</p> |
| Concept:                | Outgoing Rotation Groups (Earner Study) Variables -- PERSON                                                                                                                                                                                                                                                                                                                                                                                                                                                                                                                                                                                                                                                                                                                                                                                                                                                                                                                                                                                                                                                                                                                                                                            |
| Start Position:         | 184                                                                                                                                                                                                                                                                                                                                                                                                                                                                                                                                                                                                                                                                                                                                                                                                                                                                                                                                                                                                                                                                                                                                                                                                                                    |
| End Position:           | 191                                                                                                                                                                                                                                                                                                                                                                                                                                                                                                                                                                                                                                                                                                                                                                                                                                                                                                                                                                                                                                                                                                                                                                                                                                    |
| Width:                  | 8                                                                                                                                                                                                                                                                                                                                                                                                                                                                                                                                                                                                                                                                                                                                                                                                                                                                                                                                                                                                                                                                                                                                                                                                                                      |
| Variable Format:        | numeric                                                                                                                                                                                                                                                                                                                                                                                                                                                                                                                                                                                                                                                                                                                                                                                                                                                                                                                                                                                                                                                                                                                                                                                                                                |
| Implied Decimal Places: | 2                                                                                                                                                                                                                                                                                                                                                                                                                                                                                                                                                                                                                                                                                                                                                                                                                                                                                                                                                                                                                                                                                                                                                                                                                                      |
| Coder Instructions:     | <p>9999.99 = N.I.U. (Not in Universe).</p> <p>1990-1997: 1923 (Weekly earnings of \$1923 or more).<br/> 1998-onward: 2885 (Weekly earnings of \$2885 or more: ASEC samples only).<br/> 2884.61 for non-ASEC samples.</p> <p>See User Note [URL omitted from DDI.] for an explanation of these codes.</p>                                                                                                                                                                                                                                                                                                                                                                                                                                                                                                                                                                                                                                                                                                                                                                                                                                                                                                                               |

### Variable: "OINCWAGE"

|                |                                                                                                                                                                                                                                                            |
|----------------|------------------------------------------------------------------------------------------------------------------------------------------------------------------------------------------------------------------------------------------------------------|
| Name:          | OINCWAGE                                                                                                                                                                                                                                                   |
| Label:         | Earnings from other work included wage and salary earnings                                                                                                                                                                                                 |
| Variable Text: | OINCWAGE reports the net amount (prior to deductions) that the respondent earned in wages and salary, other than the amount earned in the primary (longest-held) job, during the preceding calendar year. The amount earned (in wages, salary, or earnings |



|                         |                                                                                                                                                                                                                                                                                                                                                                                                                                                                                                                                                                                                                                                                                                                                                                                                                                                                                                                                                                                                                                                                                                                                                                                                                                                                                                          |
|-------------------------|----------------------------------------------------------------------------------------------------------------------------------------------------------------------------------------------------------------------------------------------------------------------------------------------------------------------------------------------------------------------------------------------------------------------------------------------------------------------------------------------------------------------------------------------------------------------------------------------------------------------------------------------------------------------------------------------------------------------------------------------------------------------------------------------------------------------------------------------------------------------------------------------------------------------------------------------------------------------------------------------------------------------------------------------------------------------------------------------------------------------------------------------------------------------------------------------------------------------------------------------------------------------------------------------------------|
|                         | <p>from self-employment in a business or farm) from the longest held job during the preceding calendar year is reported in INCLONGJ.</p> <p>Imagine that an individual worked at one job for 8 months, earning \$10,000 in wages, and worked at two other jobs for the remaining 4 months, earning \$12,000 in wages. The \$12,000 in "other" wage and salary earnings (wages and salary from jobs other than the person's primary, or longest-held, job) would be reported in OINCWAGE; the \$10,000 in wages from the individual's longest-held job would be reported in INCLONGJ; and the total amount of wage and salary income from the previous calendar year (\$22,000) would be reported in INCWAGE.</p> <p>Imagine, instead, that as reported in SRCEARN, an individual was self-employed in a business or farm for their primary job, and also worked one or more additional jobs for wages. In such a case, self-employment income from the primary job would be reported in INCLONGJ; all wage and salary earnings would be reported in OINCWAGE, and the value of OINCWAGE and INCWAGE would be the same.</p> <p>Amounts are expressed as they were reported to the interviewer; users must adjust for inflation using Consumer Price Index [URL omitted from DDI.] adjustment factors.</p> |
| Concept:                | Income Variables -- PERSON                                                                                                                                                                                                                                                                                                                                                                                                                                                                                                                                                                                                                                                                                                                                                                                                                                                                                                                                                                                                                                                                                                                                                                                                                                                                               |
| Start Position:         | 192                                                                                                                                                                                                                                                                                                                                                                                                                                                                                                                                                                                                                                                                                                                                                                                                                                                                                                                                                                                                                                                                                                                                                                                                                                                                                                      |
| End Position:           | 198                                                                                                                                                                                                                                                                                                                                                                                                                                                                                                                                                                                                                                                                                                                                                                                                                                                                                                                                                                                                                                                                                                                                                                                                                                                                                                      |
| Width:                  | 7                                                                                                                                                                                                                                                                                                                                                                                                                                                                                                                                                                                                                                                                                                                                                                                                                                                                                                                                                                                                                                                                                                                                                                                                                                                                                                        |
| Variable Format:        | numeric                                                                                                                                                                                                                                                                                                                                                                                                                                                                                                                                                                                                                                                                                                                                                                                                                                                                                                                                                                                                                                                                                                                                                                                                                                                                                                  |
| Implied Decimal Places: | 0                                                                                                                                                                                                                                                                                                                                                                                                                                                                                                                                                                                                                                                                                                                                                                                                                                                                                                                                                                                                                                                                                                                                                                                                                                                                                                        |
| Coder Instructions:     | <p>9999999 = N.I.U. (Not in Universe).</p> <p>99997 = Topcode (1988-1995). For other years, see the Topcodes Tables link below.</p> <p>See User Note [URL omitted from DDI.] for an explanation of these codes, and the Topcodes Tables [URL omitted from DDI.] page for documentation on income component topcodes over time.</p>                                                                                                                                                                                                                                                                                                                                                                                                                                                                                                                                                                                                                                                                                                                                                                                                                                                                                                                                                                       |

### Variable: "WKSTAT"

|                |                                                                                                                                                                    |
|----------------|--------------------------------------------------------------------------------------------------------------------------------------------------------------------|
| Name:          | WKSTAT                                                                                                                                                             |
| Label:         | Full or part time status                                                                                                                                           |
| Variable Text: | WKSTAT is a recode from the Census Bureau that states the part-time or full-time employment status for the respondent, and reasons. It is derived from a number of |

|                         |                                                           |
|-------------------------|-----------------------------------------------------------|
|                         | labor force questions asked in the monthly questionnaire. |
| Concept:                | Work Variables -- PERSON                                  |
| Start Position:         | 199                                                       |
| End Position:           | 200                                                       |
| Width:                  | 2                                                         |
| Variable Format:        | numeric                                                   |
| Implied Decimal Places: | 0                                                         |

### Categories

| Value | Label                                                       |
|-------|-------------------------------------------------------------|
| 10    | Full-time schedules                                         |
| 11    | Full-time hours (35+), usually full-time                    |
| 12    | Part-time for non-economic reasons, usually full-time       |
| 13    | Not at work, usually full-time                              |
| 14    | Full-time hours, usually part-time for economic reasons     |
| 15    | Full-time hours, usually part-time for non-economic reasons |
| 20    | Part-time for economic reasons                              |
| 21    | Part-time for economic reasons, usually full-time           |
| 22    | Part-time hours, usually part-time for economic reasons     |
| 40    | Part-time for non-economic reasons, usually part-time       |
| 41    | Part-time hours, usually part-time for non-economic reasons |
| 42    | Not at work, usually part-time                              |
| 50    | Unemployed, seeking full-time work                          |

|    |                                    |
|----|------------------------------------|
| 60 | Unemployed, seeking part-time work |
| 99 | NIU, blank, or not in labor force  |
